# Supplementary material for: Discovery, isolation, heterologous expression and mode-of-action studies of the antibiotic polyketide tatiomicin from Amycolatopsis sp. DEM30355
Source: PubMed Central journal article supplement (PMC9481585; doi:10.1038/s41598-022-18726-3), 2022-09-16
Supplement: 41598_2022_18726_MOESM1_ESM.pdf [file 41598_2022_18726_MOESM1_ESM.pdf]

## Table of Contents

|                                                                                    |            |
|------------------------------------------------------------------------------------|------------|
| <b>Identification and Classification of DEM30355</b>                               | <b>S1</b>  |
| Phylogenetic Analysis of DEM30355                                                  | S1         |
| Neighbour-joining tree for DEM30355                                                | S2         |
| Photographic Images of DEM30355                                                    | S3         |
| Scanning Electron Microscopy of DEM30355                                           | S4         |
| <b>Fermentation of DEM30355</b>                                                    | <b>S5</b>  |
| <b>Structural Analysis of Tatiomicin/Tatiomicin*</b>                               | <b>S6</b>  |
| HPLC Separation of the Epimers of Tatiomicin                                       | S6         |
| Evaluation of Epimer Stability by HPLC                                             | S6         |
| UV Absorption Spectra of Tatiomicin and Tatiomicin*                                | S7         |
| LCMS of Tatiomicin and Tatiomicin*                                                 | S8         |
| <b>Chemical Characterization of Tatiomicin/Tatiomicin*</b>                         | <b>S9</b>  |
| Chemical Characterization of Tatiomicin and Tatiomicin* including optical rotation | S9         |
| Comparison of <sup>1</sup> H NMR data of Tatiomicin vs Tatiomicin*                 | S10        |
| NMR data for Tatiomicin/Tatiomicin*                                                | S11        |
| NMR data for Tatiomicin                                                            | S14        |
| NMR data for Tatiomicin*                                                           | S17        |
| <b>X-Ray Crystallographic Studies of Tatiomicin</b>                                | <b>S20</b> |
| Crystallography Data Tables for Tatiomicin                                         | S20        |
| <b>Computational Methods</b>                                                       | <b>S31</b> |
| Conformers of Tatiomicin                                                           | S31        |
| Conformers of Tatiomicin*                                                          | S32        |
| Experimental and Calculated VCD and ECD Spectra                                    | S33        |
| Cartesian coordinates of calculated conformers                                     | S34        |
| <b>Genome sequencing and analysis of biosynthetic pathway</b>                      | <b>S49</b> |
| Bioinformatic analysis                                                             | S49        |
| Proposed biosynthesis of tatiomicin                                                | S55        |
| <b>Heterologous expression of tatiomicin</b>                                       | <b>S57</b> |
| Analysis of Exconjugants                                                           | S57        |
| <b>Bioactivity Studies</b>                                                         | <b>S59</b> |
| MIC determination against a panel of bacterial isolates                            | S59        |
| <b>Mode of Action Studies</b>                                                      | <b>S61</b> |
| Reporter strain panel                                                              | S61        |
| Assessment of Michael acceptor ability of tatiomicin                               | S62        |

|                                                      |            |
|------------------------------------------------------|------------|
| Single cell microscopy                               | S65        |
| Creation of tatiomicin/tatiomicin* resistant mutants | S66        |
| <b>Microorganisms Used</b>                           | <b>S67</b> |
| <b>References</b>                                    | <b>S68</b> |

## Identification and Classification of DEM30355

### Phylogenetic analysis of DEM30355

The total genomic DNA was extracted using Gene Elute™ Bacterial Genomic Kits (Sigma), following the manufacturer's protocol for the analysis of Gram-positive bacteria. An amplification of the 16S gene was performed using the primers 27F and 1525R.

**Table S1** PCR conditions for amplification of 16S gene

|                      | Time in min | Temperature in °C |           |
|----------------------|-------------|-------------------|-----------|
| Initial denaturation | 5           | 95                |           |
| Denaturation         | 1           | 94                | 30 Cycles |
| Annealing            | 1           | 58                |           |
| Extension            | 1           | 72                |           |
| Final Extension      | 10          | 72                |           |

Primers Employed:

27f            5'-AGAGTTTGATCMTGGCTCAG

1525r        5'-AAGGAGGTGWTCCARCC

The PCR product was purified using GeneJet PCR purification Kit (Thermo Scientific) and the product was subsequently sequenced at SolGent Co., Ltd. The resulting sequences were trimmed and assembled in a DNA Baser and uploaded for identification to the online server EZTaxon. The 16S sequences of related *Amycolatopsis* and the *Prauserella rugosa* (GenBank accession no AB297964.1) was downloaded from EZTaxon and imported into the Mega X software package to perform neighbour-joining maximum likelihood and maximum parsimony tree-making algorithm based on 1000 bootstrap iterations.

## Neighbour-joining tree for DEM30355

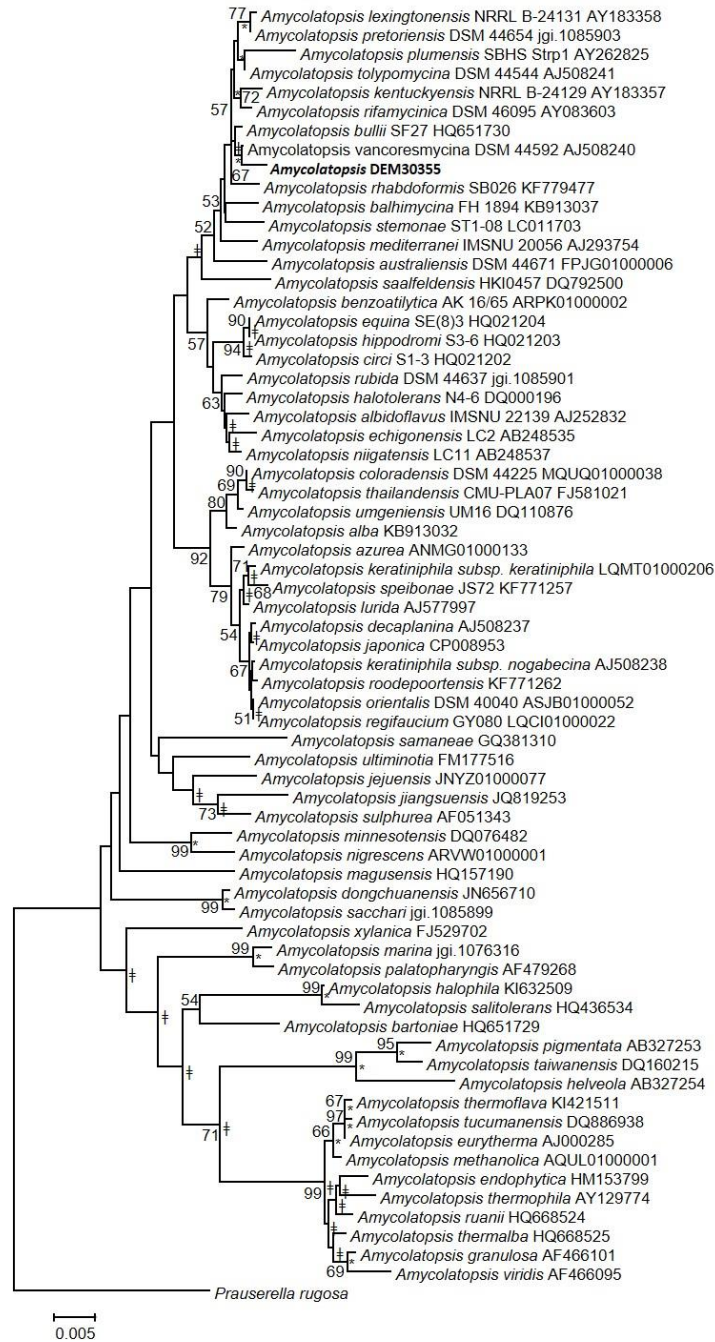

**Figure S1** Neighbour-joining tree based on nearly complete 16S rRNA sequences showing relationships between isolate DEM 30355 and the type strains of *Amycolatopsis* species. Stars (\*) indicate branches that were also recovered using the maximum-likelihood and maximum-parsimony tree-making algorithm; palatal click (‡) indicate branches that were also recovered with the maximum-likelihood tree-making algorithm. Numbers on the nodes are percentage bootstrap values based on a neighbour-joining analysis of 1000 resampled datasets. Only values >50 % are shown. *Prauserella rugosa* (GenBank accession no AB297964.1) was used as an outgroup.

**Photographic Images of DEM30355**

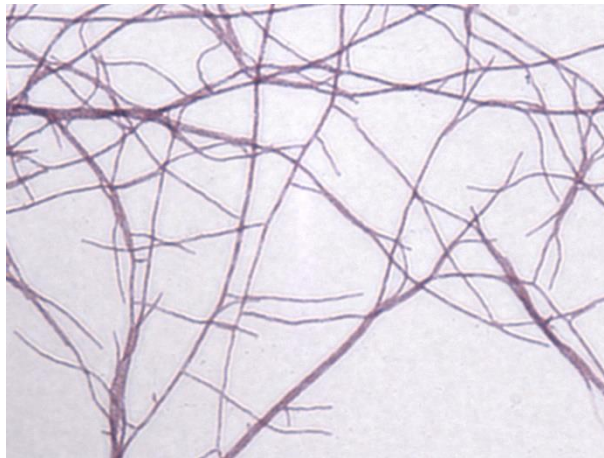

**Figure S2** Microscope image of *Amycolatopsis* sp. DEM30355 with Gram-stain

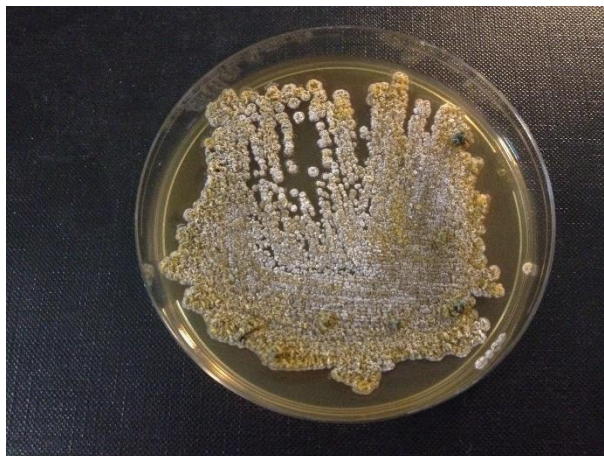

**Figure S3** *Amycolatopsis* sp. DEM30355 grown on GYMG agar

## Scanning Electron Microscopy of DEM30355

*Amycolatopsis* isolate DEM30355 was fixed overnight in 2% glutaraldehyde in Sorenson's Phosphate buffer (0.1 M sodium phosphate buffer, pH 7.2) then rinsed in several changes of Sorenson's buffer. The cells were dehydrated using 25%, 50% and 75% ethanol for 30min each, followed by 100% ethanol x2 for 1h, and carbon dioxide in a Baltec Critical Point Dryer. The specimen was mounted on an aluminium stub with Achesons Silver Dag and dried overnight. The sample was coated with gold, 5-10 nm using a Polaron SEM Coating Unit. The specimen was examined using a TESCAN VEGA LMU Scanning Electron Microscope housed within the EM Research Services (Newcastle University).

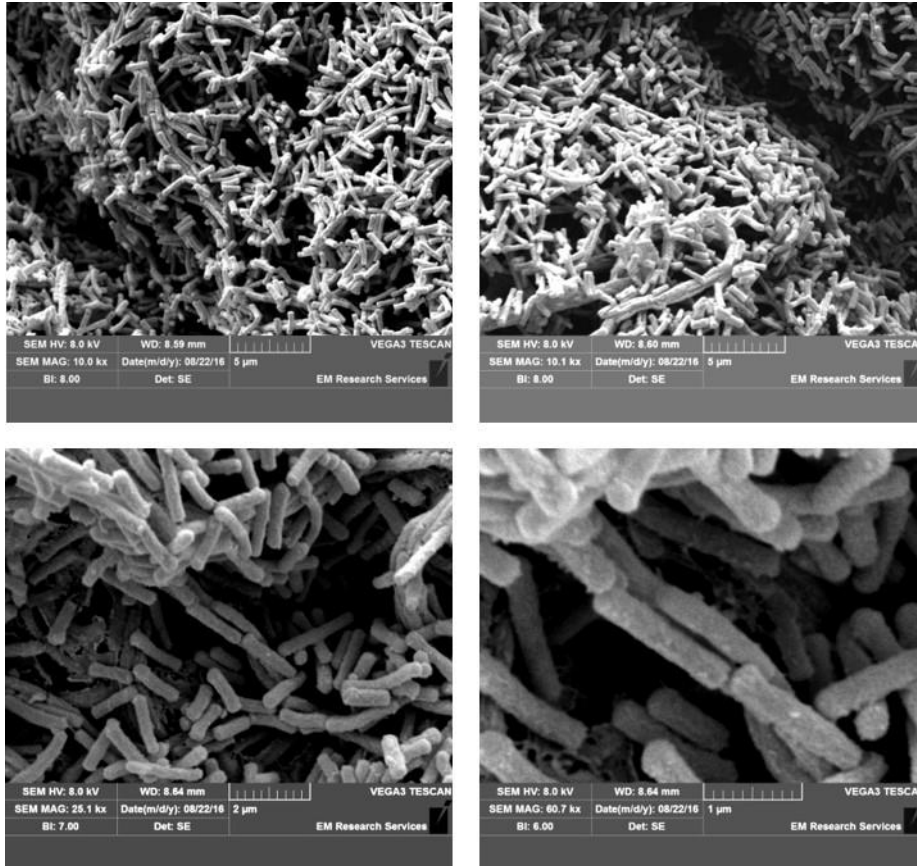

Figure S4 SEM images of DEM30355

## Fermentation of DEM30355

The optical density was measured at 450 nm. The dry cell weight was determined using 15 mL falcon tubes in triplicates. Determination of glucose was performed using the SD Codefree blood glucose monitoring system with disposable strips. Alkaline phosphatase and phosphate was determined using published methods.<sup>1</sup>

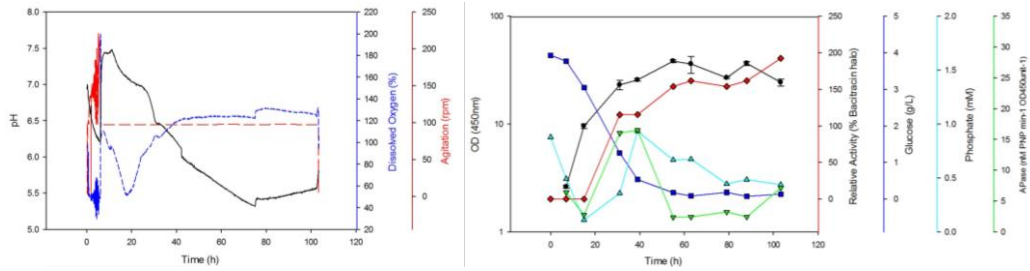

**Figure S5** DEM30355 grown in 500 L bioreactor in GYMG over 103.5h: (left) Online measurements; (—), pH was controlled at pH 7; (---), Dissolved Oxygen; (---), Agitation; (right) Offline measurements (★) Dry cell weight; (●), Optical density; (◆), Relative activity; (■), Glucose concentration; (▲), Phosphate concentration; (▼), Alkaline Phosphatase activity.

## Structural Analysis of Tatiomicin

### HPLC Separation of the Epimers of Tatiomicin

A sample of tatiomicin, as a mixture of epimers, was further purified via HPLC to provide material for NMR analysis (using an Agilent 1260 with an integrated fraction collector on a semi-preparative C18 column (250 x 10 mm, 5  $\mu$ m)). A linear gradient from 30% over 60 min (water (0.1 % formic acid): acetonitrile (0.1 % formic acid)) at a flow rate of 2.5 mL/min was performed with monitoring by UV/vis absorption at 325 nm.

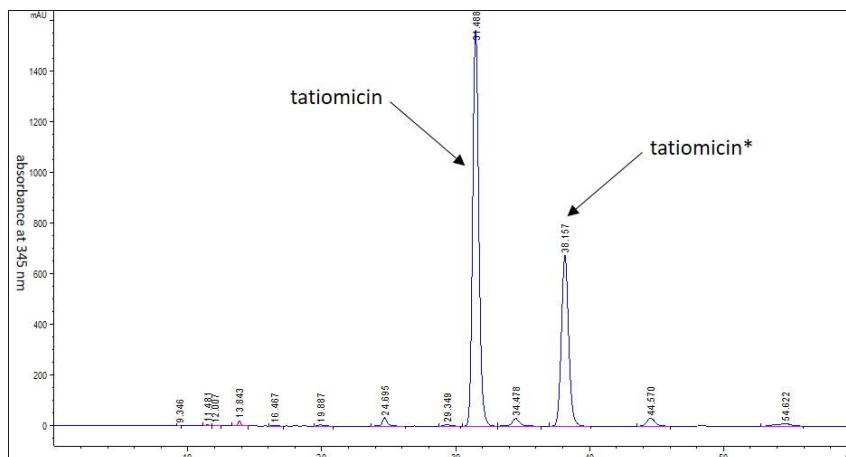

**Figure S6** HPLC separation of the epimers of tatiomicin, UV-vis absorption recorded at 325 nm.

### Evaluation of Epimer Stability by HPLC

In order to evaluate the stability of the minor epimer of tatiomicin (tatiomicin\*), immediately following HPLC separation fractions containing tatiomicin\* were collected and HPLC analysis was carried out at 2 hour intervals. After 8 h, nearly half of minor epimer of tatiomicin had epimerised to the corresponding major epimer.

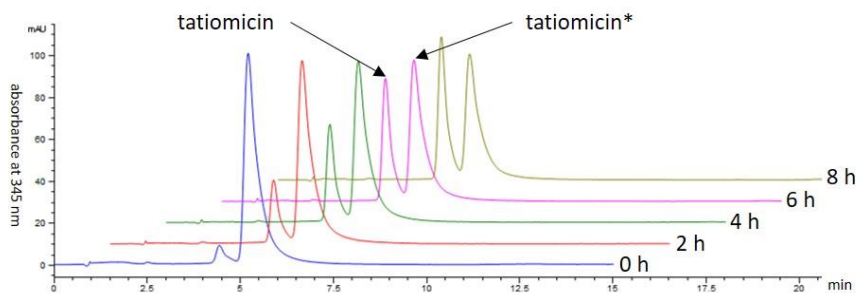

**Figure S7** HPLC analysis of minor epimer of tatiomicin versus time showing equilibration with major epimer.



## UV Absorption Spectra of Tatiomicin and Tatiomicin\*

The UV/VIS spectra of tatiomicin and tatiomicin\* were measured during HPLC separation of a mixture of the epimers of tatiomicin using an Agilent 1260 HPLC equipped with a fully wavelength UV/vis detector.

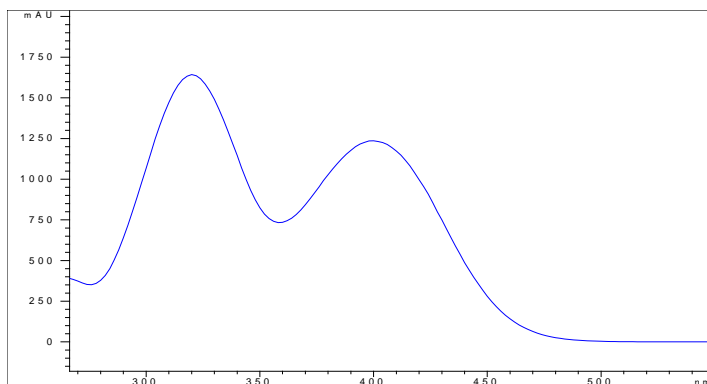

**Figure S8** UV/vis absorption spectrum of tatiomicin

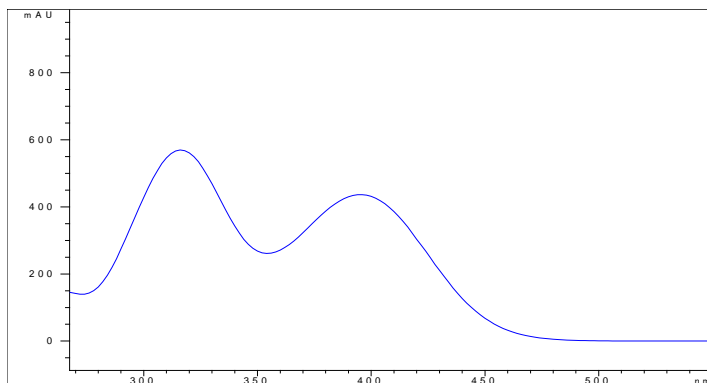

**Figure S9** UV/vis absorption spectrum of tatiomicin\*

### LCMS of Tatiomicin and Tatiomicin\*

Liquid chromatography - mass spectrometry (LCMS) experiments were performed on an Agilent HPLC 1260 – MicroTOF, using electrospray ionisation in positive mode. Both tatiomicin and tatiomicin\* showed the presence of  $[M+H]^+$  (403),  $[M+Na]^+$  (425),  $[2M+Na]^+$  (827) and  $[3M+Na]^+$  (1229) ions.

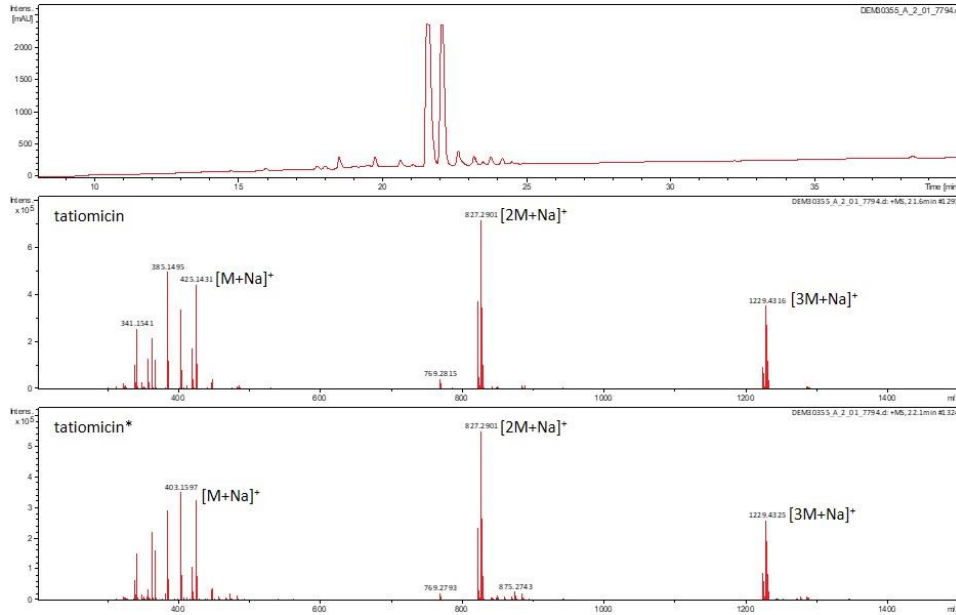

**Figure S10** LCMS chromatogram (top) and mass spectra of tatiomicin (middle) and tatiomicin\* (bottom).

## Chemical Characterisation of Tatiomicin and Tatiomicin\*

Table S2 NMR data for (–)-tatiomicin (**3**).

| Position | $\delta_{\text{H}}$ (J in Hz) | $\delta_{\text{C}}$ | Position | $\delta_{\text{H}}$ (J in Hz) | $\delta_{\text{C}}$   |
|----------|-------------------------------|---------------------|----------|-------------------------------|-----------------------|
| 1        | -                             | 196.3, C            | 9a       | -                             | 129.0, C              |
| 2        | 2.78 q (7.6)                  | 49.8, CH            | 10       | 5.49 s                        | 66.5, CH              |
| 3        | -                             | 81.7, C             | 10a      | -                             | 118.9, C              |
| 4        | -                             | 82.7, C             | 11       | 5.47 dq (12.0, 2.0)           | 124.7, CH             |
| 4a       | -                             | 83.5, C             | 12       | 5.77 dq (12.0, 7.2)           | 133.2, CH             |
| 5        | -                             | 151.2, C            | 13       | 1.94 dd (7.2, 2.0)            | 15.6, CH <sub>3</sub> |
| 6        | 6.92 d, (9.2)                 | 112.8, CH           | 14       | -                             | 174.9, C              |
| 7        | 7.05 d (9.2)                  | 115.9, CH           | 15       | 1.20 d (7.6)                  | 11.3, CH <sub>3</sub> |
| 8        | -                             | 152.9, C            | 16       | 3.84 s                        | 56.4, CH <sub>3</sub> |
| 8a       | -                             | 123.3, C            | 17       | 3.85, s                       | 56.5, CH <sub>3</sub> |
| 9        | 8.12 s                        | 131.9, CH           | -        | -                             | -                     |

### Optical Rotation Tatiomicin

$[\alpha]_{\text{D}} -78$  (c 0.3, CH<sub>2</sub>Cl<sub>2</sub>)

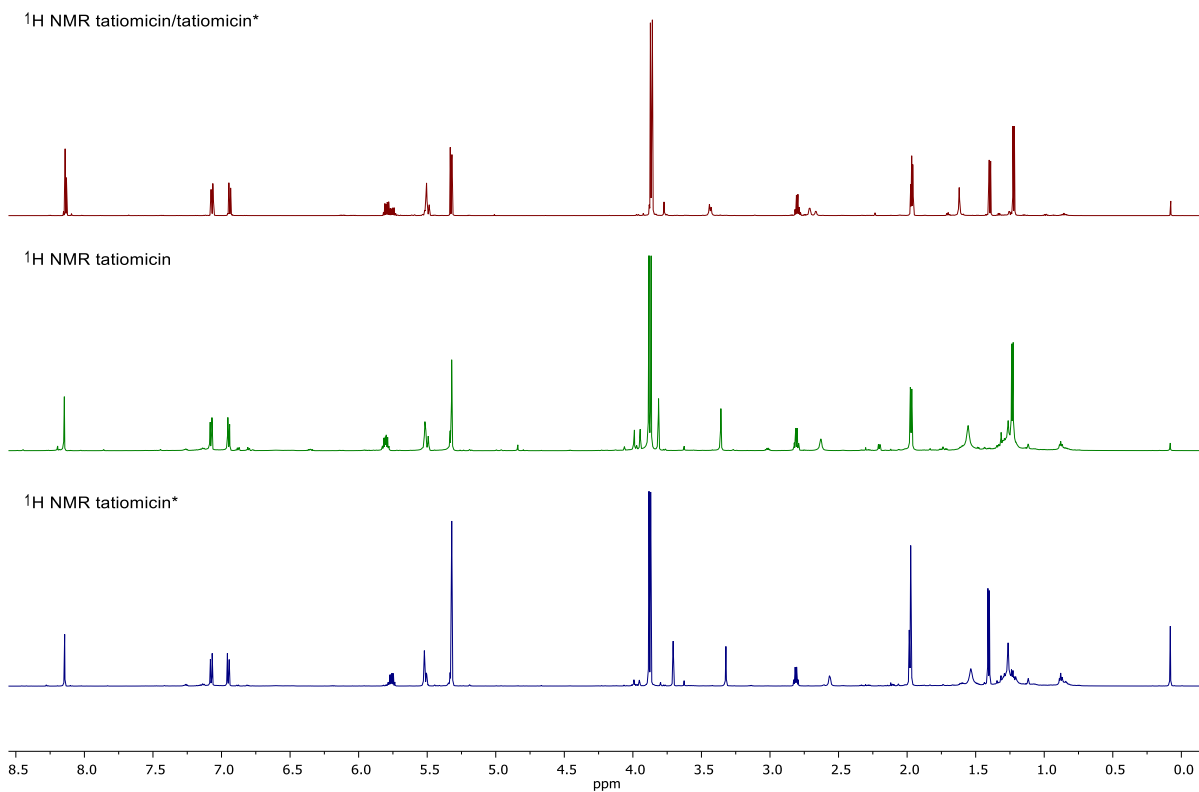

**Figure S11** Comparison of <sup>1</sup>H NMR data of Tatiomicin vs Tatiomicin\*

NMR data Tatiomicin/Tatiomicin\*

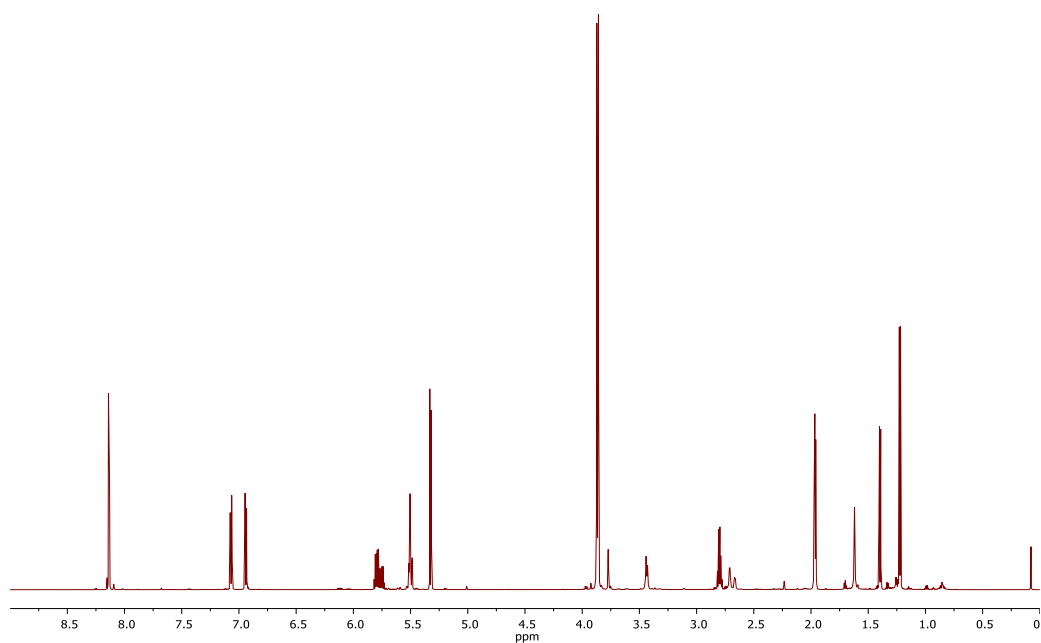

Figure S12  $^1\text{H}$  NMR 700 MHz ( $\text{CD}_2\text{Cl}_2$ )

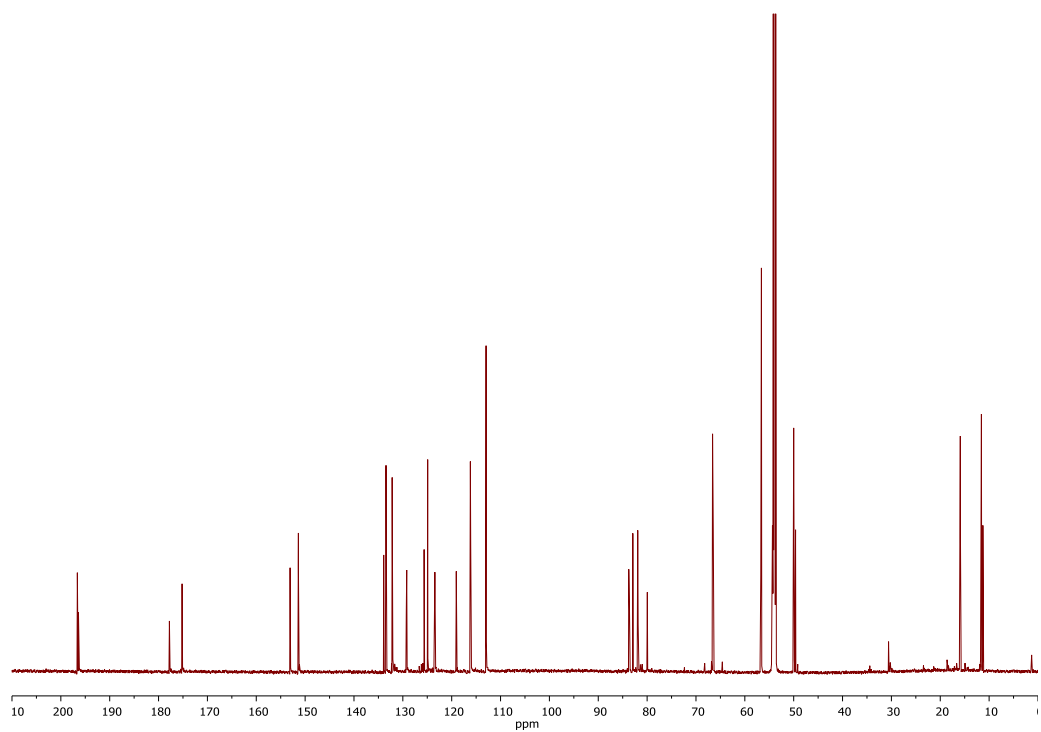

Figure S13  $^{13}\text{C}$  NMR 175 MHz ( $\text{CD}_2\text{Cl}_2$ )

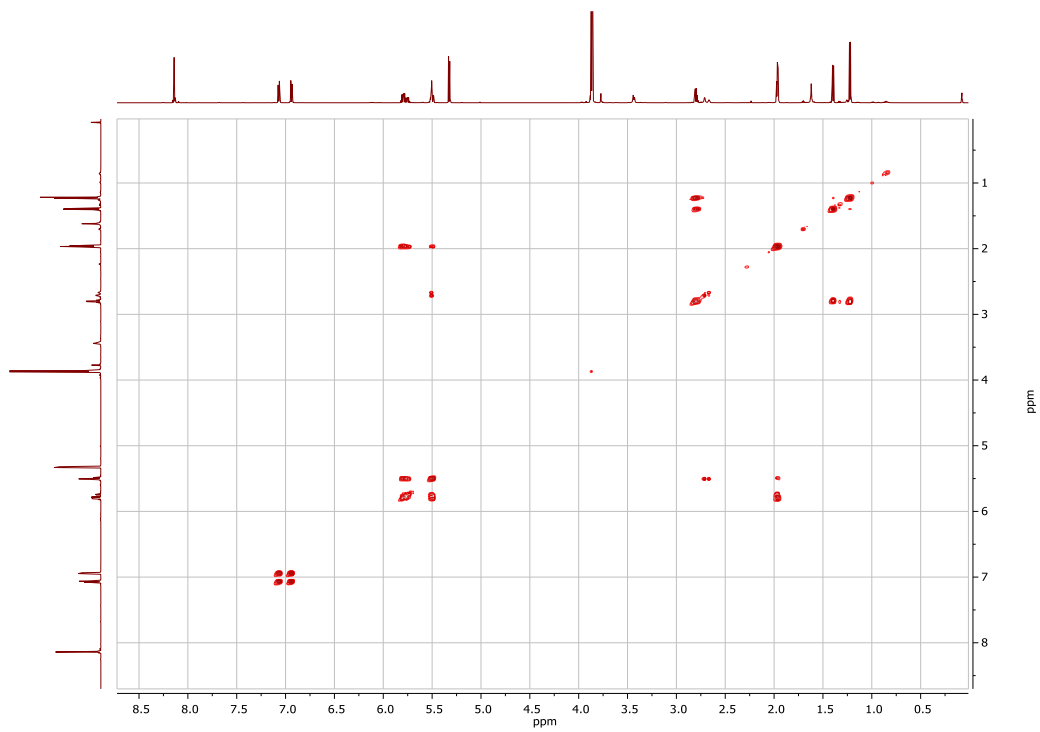

Figure S14 COSY (CD<sub>2</sub>Cl<sub>2</sub>)

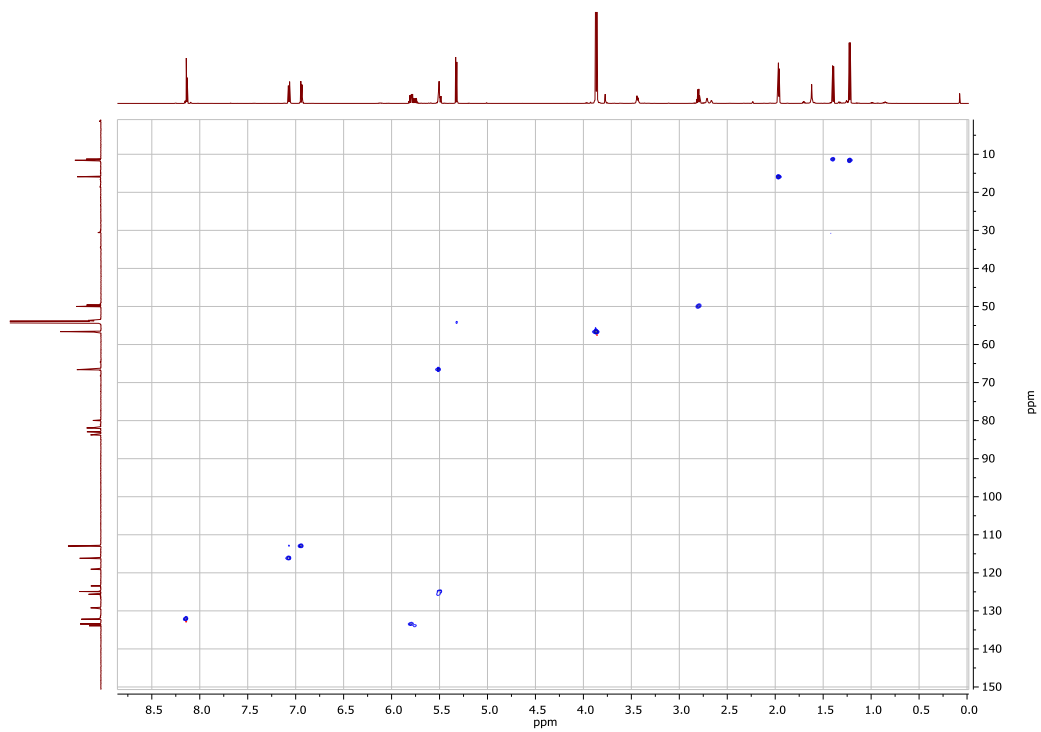

Figure S15 HSQC (CD<sub>2</sub>Cl<sub>2</sub>)

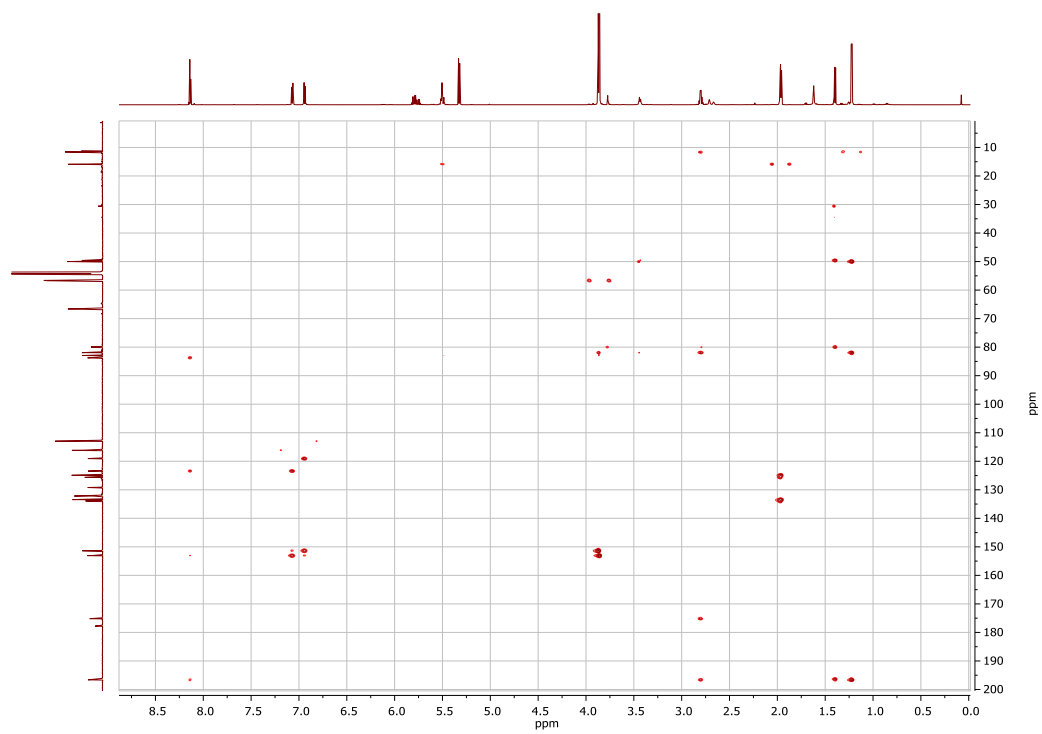

**Figure S16** HMBC ( $\text{CD}_2\text{Cl}_2$ )

NMR data Tatiomicin

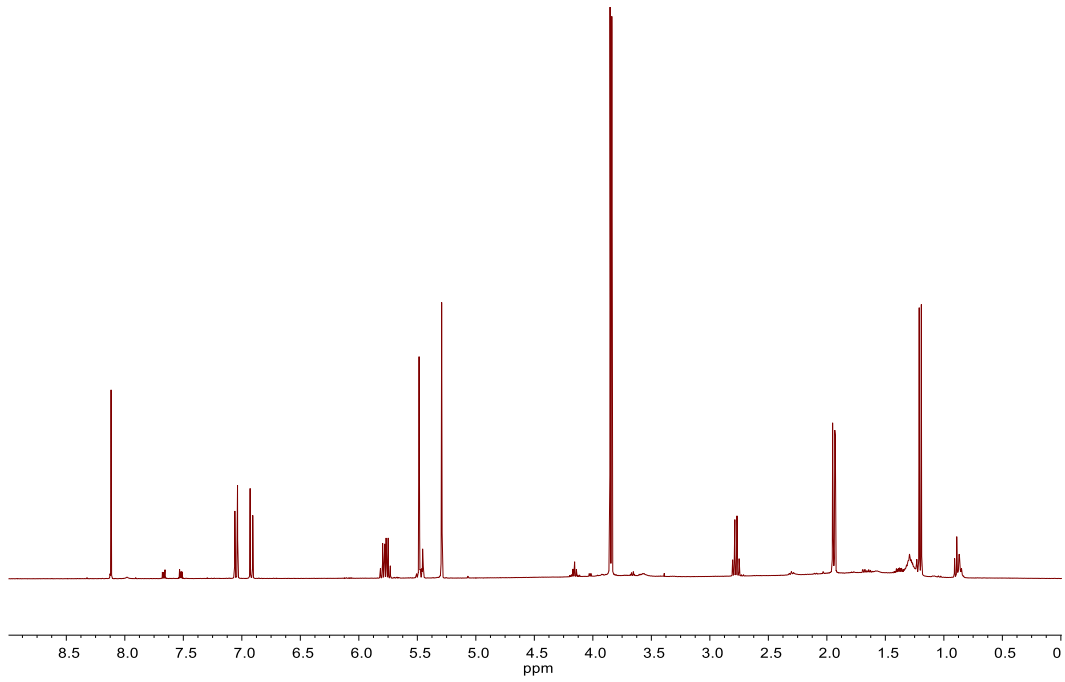

Figure S17  $^1\text{H}$  NMR 500 MHz ( $\text{CD}_2\text{Cl}_2$ )

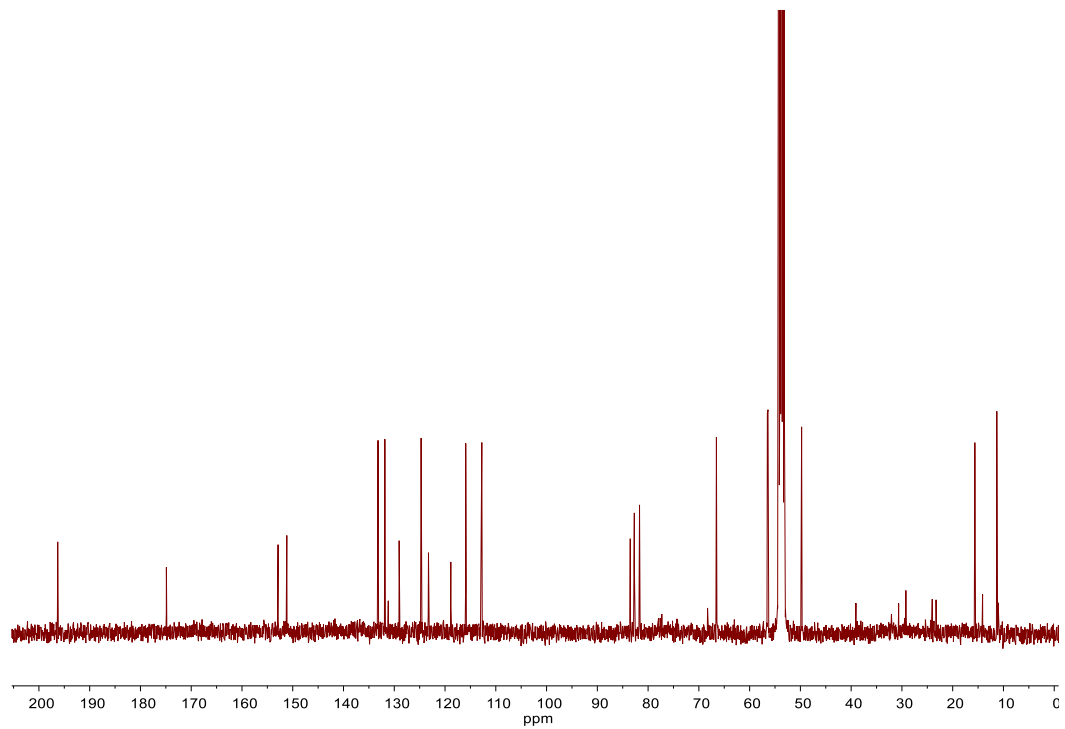

Figure S18  $^{13}\text{C}$  NMR 125 MHz ( $\text{CD}_2\text{Cl}_2$ )



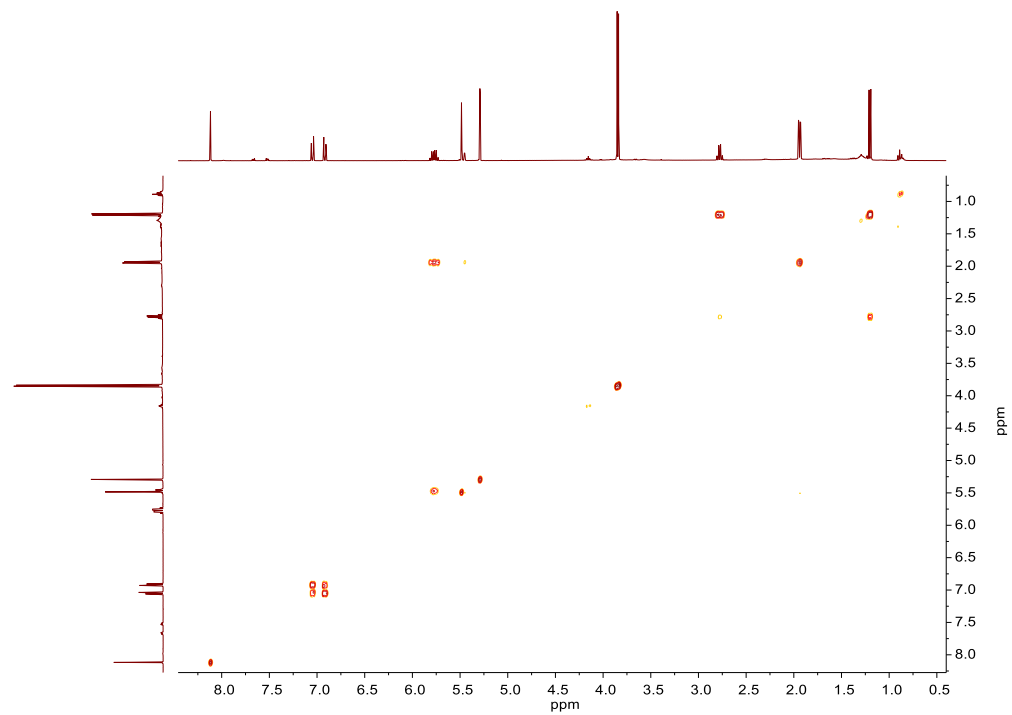

**Figure S19** COSY (CD<sub>2</sub>Cl<sub>2</sub>)

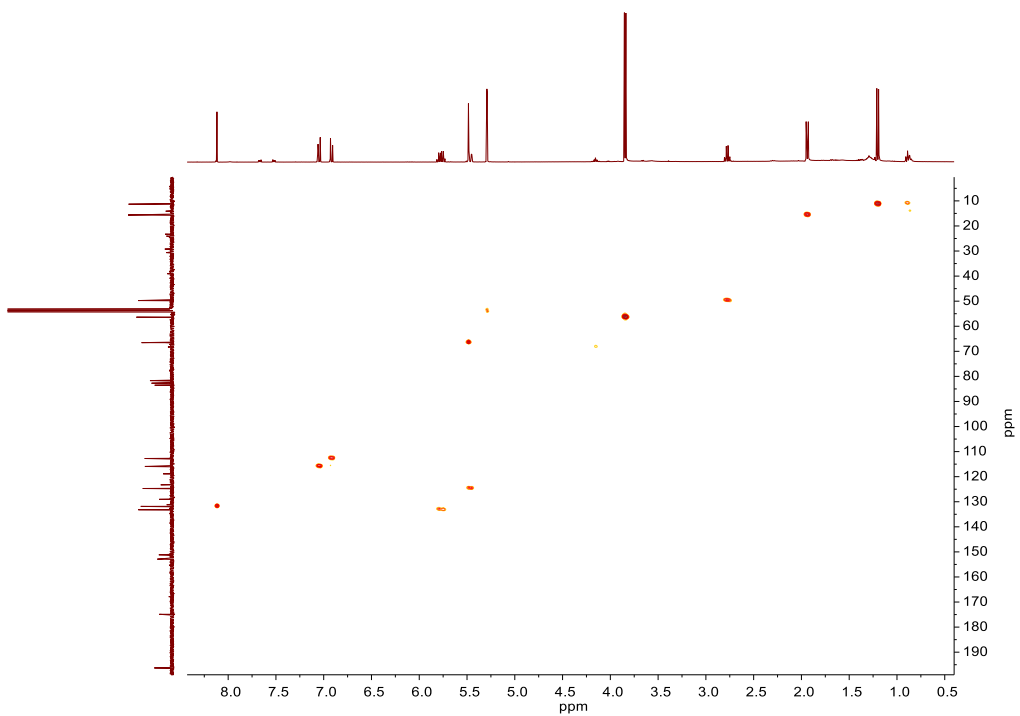

**Figure S20** HSQC (CD<sub>2</sub>Cl<sub>2</sub>)

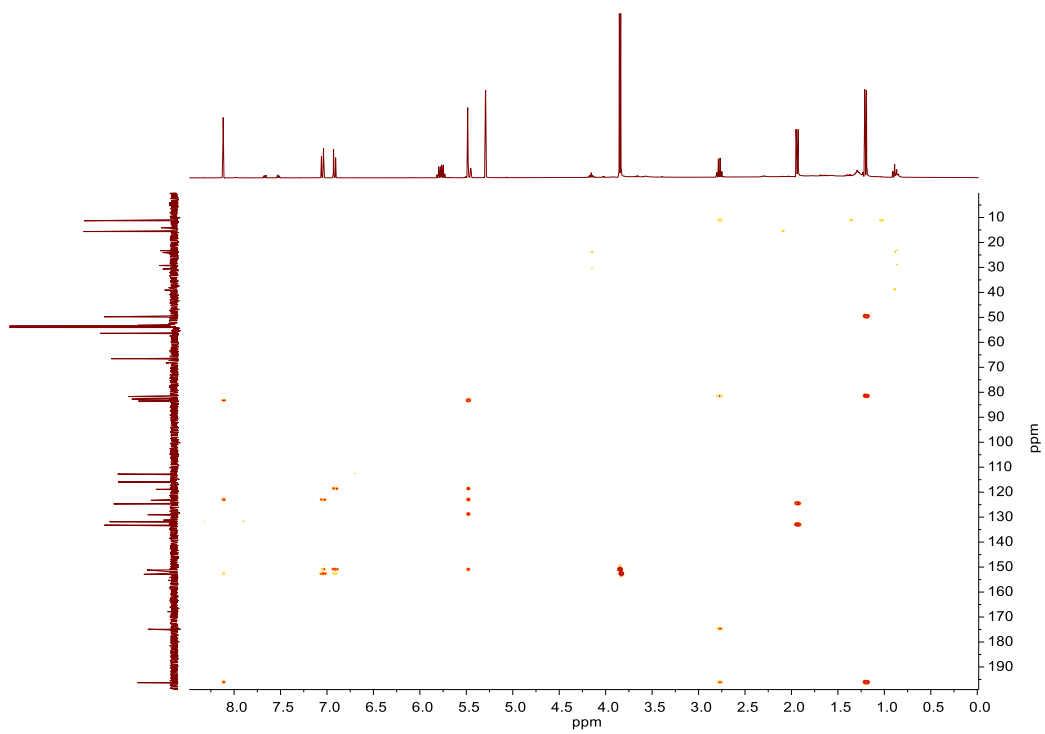

Figure S21 HMBC ( $\text{CD}_2\text{Cl}_2$ )

NMR data Tatiomicin\*

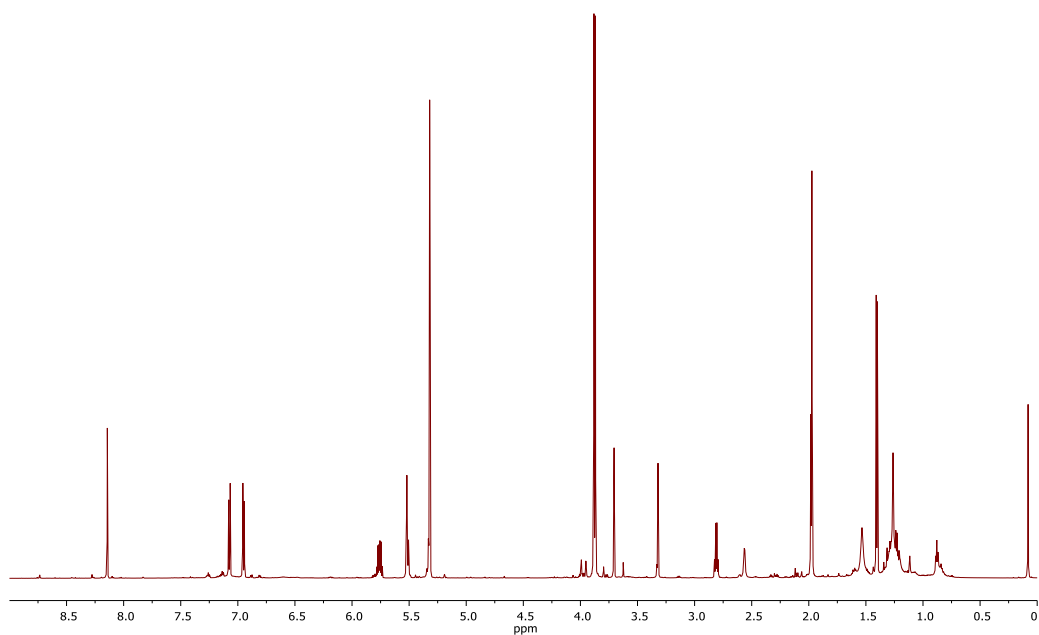

Figure S22 HMBC (CD<sub>2</sub>Cl<sub>2</sub>) <sup>1</sup>H NMR 700 MHz (CD<sub>2</sub>Cl<sub>2</sub>)

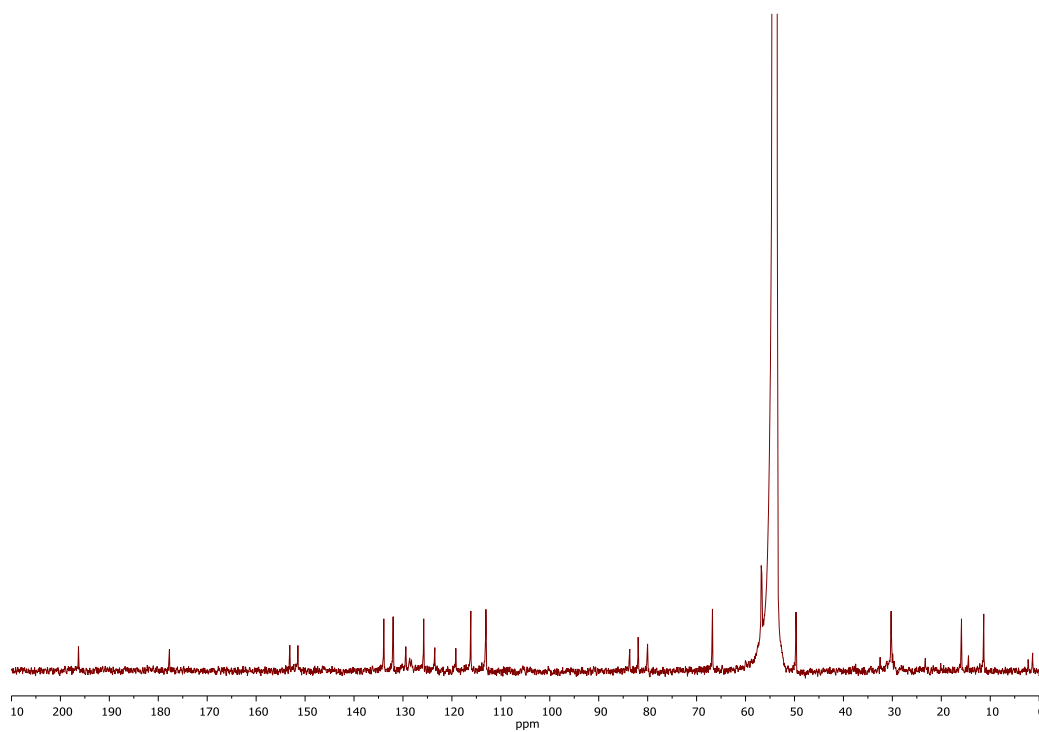

Figure S23 <sup>13</sup>C NMR 175 MHz (CD<sub>2</sub>Cl<sub>2</sub>)

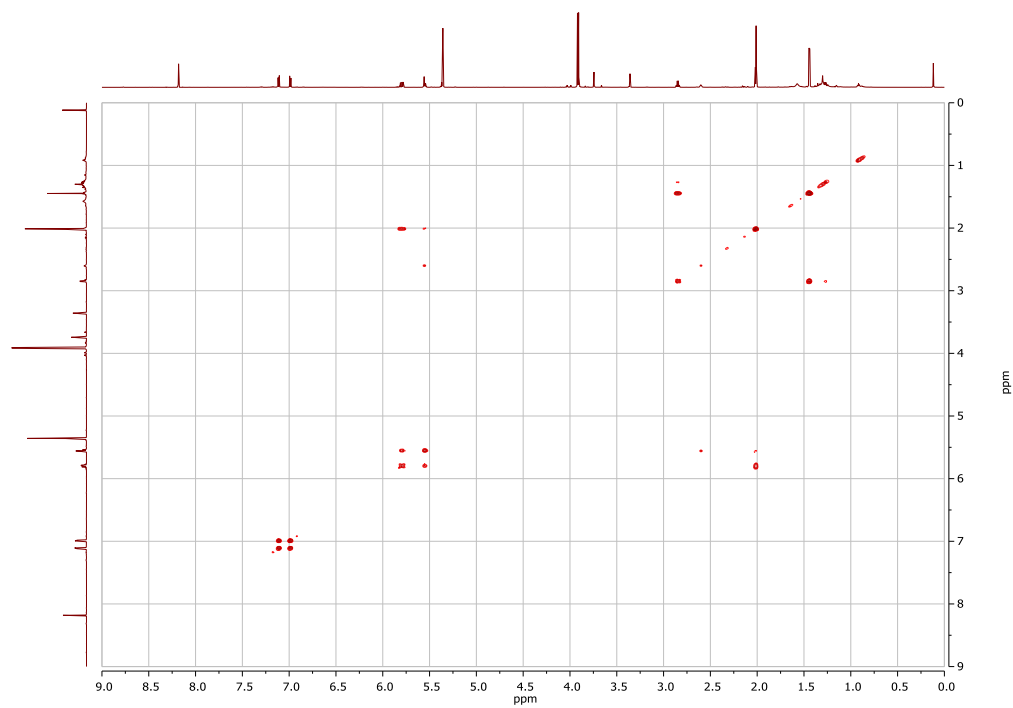

**Figure S 24** COSY (CD<sub>2</sub>Cl<sub>2</sub>)

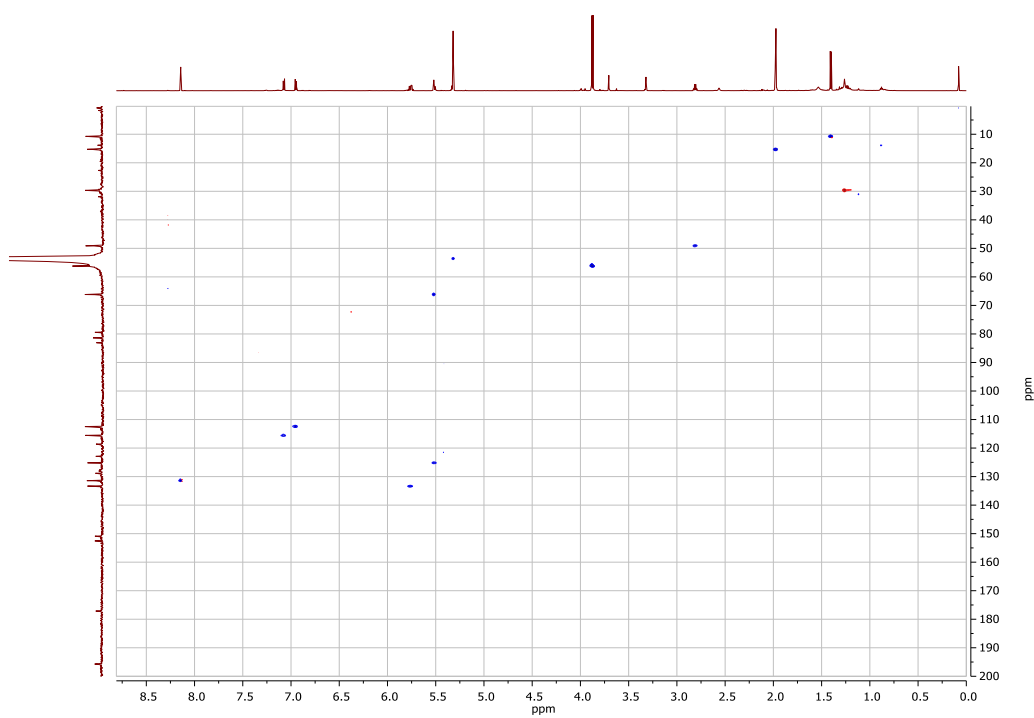

**Figure S25** HSQC (CD<sub>2</sub>Cl<sub>2</sub>)

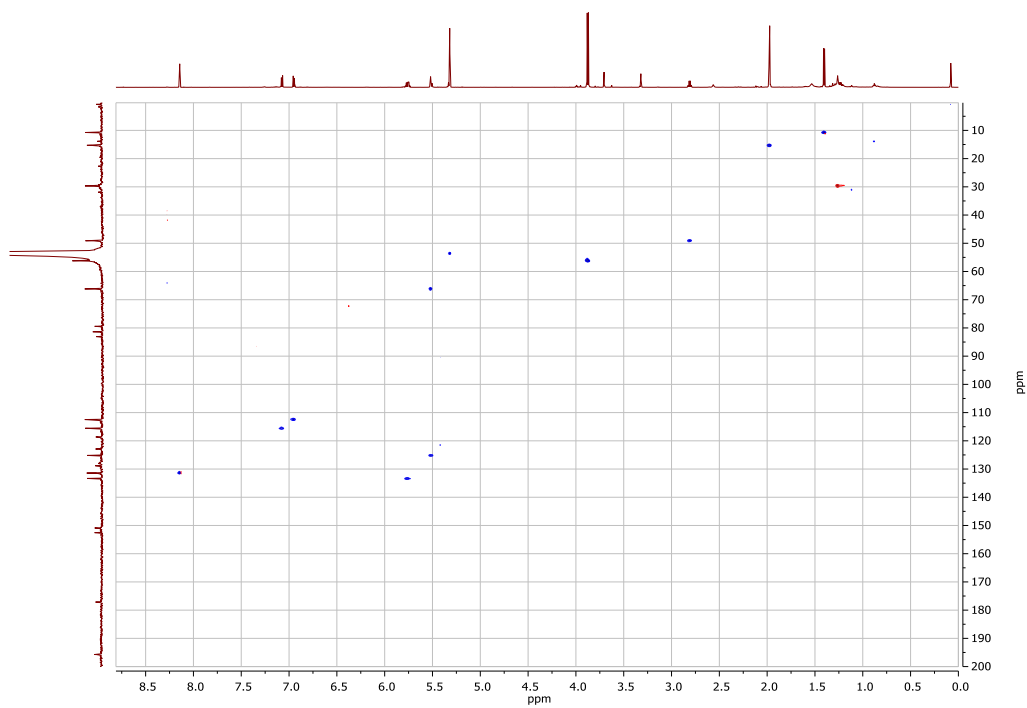

Figure S26 HMBC (CD<sub>2</sub>Cl<sub>2</sub>)

## X-Ray Crystallographic Studies of Tatiomicin

An initial single-crystal X-ray diffraction experiment was conducted at Diamond Light Source beamline I19 prior to its major upgrade in 2016,<sup>2</sup> following in-house screening to demonstrate that synchrotron radiation was required for the very small crystals. The principal beamline equipment was a Crystal Logics kappa-geometry diffractometer fitted with a Rigaku Saturn 724+ CCD detector and controlled by Rigaku CrystalClear software. The sample temperature, maintained by an Oxford Cryosystems Cryostream nitrogen-gas cooler, was 150 K, and the X-ray wavelength was 0.6889 Å (standard beamline conditions, close to the Zr absorption edge and similar to the widely used Mo- $K\alpha$  wavelength). This wavelength does not permit determination of absolute configuration for a chiral molecule, the resonant scattering contributions being too small for compounds containing no elements heavier than oxygen; the configuration reported here is that confirmed subsequently in the second diffraction experiment with longer X-ray wavelength.

The structure was determined by standard direct methods and refined by least-squares techniques based on all unique measured data (refinement on  $F^2$  values).<sup>3, 4</sup> The asymmetric unit consists of two independent tatiomicin molecules and one molecule of  $d_6$ -benzene; this solvent was used for recording NMR spectra prior to crystallization. All components are fully ordered. The data were of sufficient quality for O-bound H atoms to be refined freely, while C-bound H atoms were constrained with a riding model. Hydrogen bonding patterns were thus established and are included in the CIF-format results deposited in the Cambridge Structural Database. A summary of crystal data and refinement information is given below (Table S3).

In order to establish the absolute configuration experimentally, a further X-ray diffraction experiment was conducted following the I19 beamline upgrade. Another crystal from the same original sample was selected. The principal equipment of the upgraded beamline is a large custom-built 3-circle fixed- $\chi$  diffractometer fitted with a Dectris Pilatus 2M detector, controlled by Diamond Light Source GDA software.<sup>5</sup> The sample temperature (Cryostream) was 100 K, and the X-ray wavelength was 1.4879 Å (close to the Ni absorption edge, and similar to the widely used Cu- $K\alpha$  wavelength). This unusual experimental beamline arrangement requires a large number of individual scans with different detector positions in order to obtain a complete diffraction pattern with moderate multiplicity of observations.

Approximately 1/6 of the solvent molecules were lost from the crystal in the intervening period. In those locations, the nearby dimethoxy-substituted benzene ring of one of the tatiomicin molecules in the

asymmetric unit is slightly displaced towards the vacant solvent site. This has been modelled by inclusion of a minor disorder component for this part of the molecule. The refined occupancy factors for the major disorder component and the solvent molecule refined independently to essentially the same value, so they were subsequently set to be equal; this treatment is seen to be valid by recognition of unacceptably short contacts between the minor disorder component and the solvent molecule, meaning that they cannot both be present together. The disorder makes no significant difference to the molecular geometry; the difference between the major and minor components is mainly a small hinge movement about the C29...C30 axis in the central non-aromatic ring.

The principal purpose of this experiment was to establish the absolute configuration, which was indeterminate in the previous experiment with short-wavelength X-rays. This has been completely successful: the absolute-structure ('Flack') parameter<sup>6-8</sup> has a value of 0.05(6), insignificantly different from zero and with a small standard uncertainty, indicating the correct absolute configuration in the refined model structure (Table S4).

Detailed analysis of the molecular geometry is best done with the previous, fully ordered, crystal structure. The two structures are of comparable precision. Note that different temperatures were used (150 and 100 K). A summary of crystal data and refinement information for the second experiment is provided in Table S2 below. Methods and software were as for the first set of data. A listing of molecular geometrical parameters for the ordered structure is given below (Table S5).

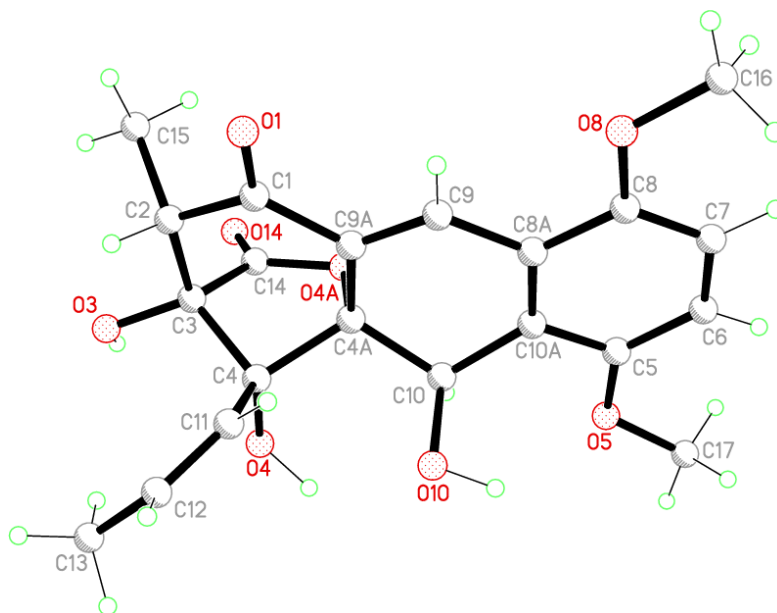

**Figure S27** One of the two molecules of tatiomicin in the asymmetric unit

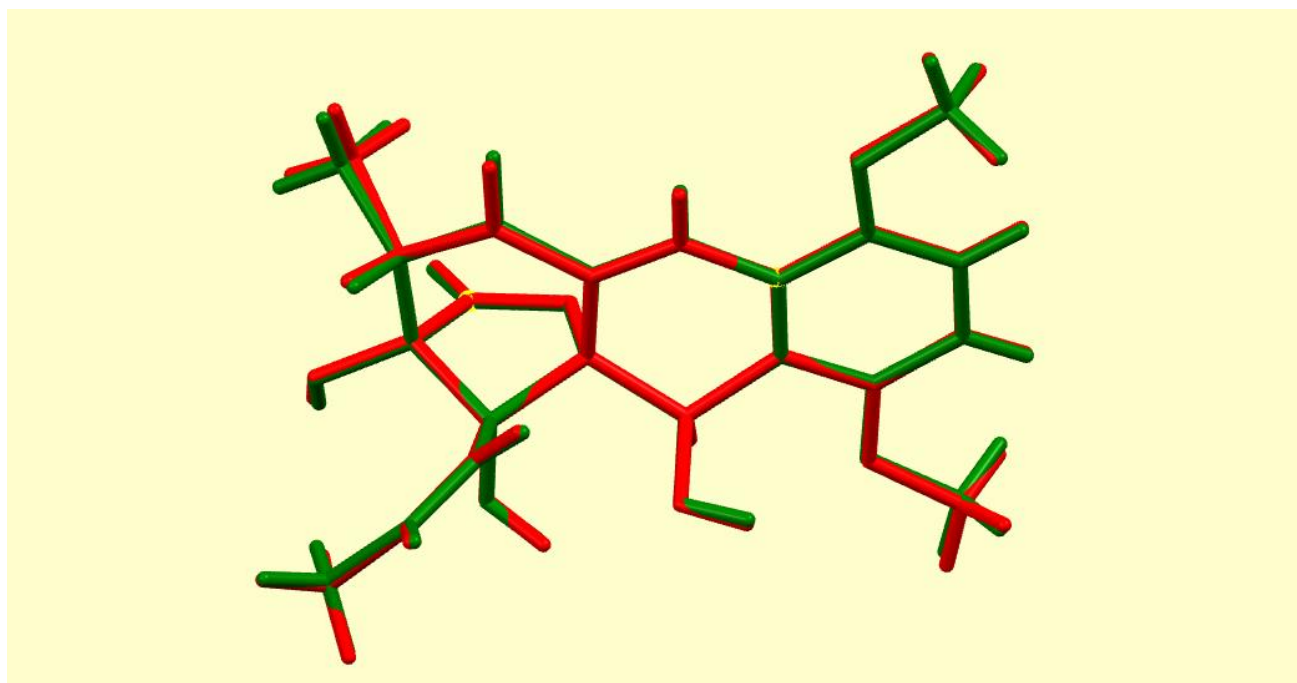

**Figure S28** An overlay of the two molecules (red and green) in the asymmetric unit (ignoring the minor disorder component), showing that they have essentially the same conformation and the same absolute configuration (second experiment, at 100 K)



### Crystallography Data Tables for Tatiomicin

**Table S3.** Crystal data and structure refinement from first experiment.

|                                       |                                                                         |                     |
|---------------------------------------|-------------------------------------------------------------------------|---------------------|
| Identification code                   | mjh73                                                                   |                     |
| Chemical formula (moiety)             | $C_{21}H_{22}O_8 \cdot 0.5C_6D_6$                                       |                     |
| Chemical formula (total)              | $C_{24}H_{22}D_3O_8$                                                    |                     |
| Formula weight                        | 444.46                                                                  |                     |
| Temperature                           | 150(2) K                                                                |                     |
| Radiation, wavelength                 | synchrotron, 0.6889 Å                                                   |                     |
| Crystal system, space group           | orthorhombic, $P2_12_12_1$                                              |                     |
| Unit cell parameters                  | $a = 8.0333(13)$ Å                                                      | $\alpha = 90^\circ$ |
|                                       | $b = 17.001(3)$ Å                                                       | $\beta = 90^\circ$  |
|                                       | $c = 32.193(5)$ Å                                                       | $\gamma = 90^\circ$ |
| Cell volume                           | $4396.7(13)$ Å <sup>3</sup>                                             |                     |
| Z                                     | 8                                                                       |                     |
| Calculated density                    | 1.343 g/cm <sup>3</sup>                                                 |                     |
| Absorption coefficient $\mu$          | 0.060 mm <sup>-1</sup>                                                  |                     |
| F(000)                                | 1864                                                                    |                     |
| Crystal colour and size               | yellow, 0.100 × 0.020 × 0.020 mm <sup>3</sup>                           |                     |
| Reflections for cell refinement       | 9992 ( $\theta$ range 2.5 to 24.3°)                                     |                     |
| Data collection method                | Rigaku Saturn 724+ on kappa diffractometer<br>wide-frame $\omega$ scans |                     |
| $\theta$ range for data collection    | 1.2 to 24.4°                                                            |                     |
| Index ranges                          | h -9 to 9, k -20 to 20, l -38 to 38                                     |                     |
| Completeness to $\theta = 24.4^\circ$ | 98.8 %                                                                  |                     |
| Reflections collected                 | 34672                                                                   |                     |
| Independent reflections               | 7819 ( $R_{int} = 0.0676$ )                                             |                     |
| Reflections with $F^2 > 2\sigma$      | 6274                                                                    |                     |
| Absorption correction                 | none                                                                    |                     |
| Structure solution                    | direct methods                                                          |                     |
| Refinement method                     | Full-matrix least-squares on $F^2$                                      |                     |
| Weighting parameters a, b             | 0.0622, 0.1985                                                          |                     |
| Data / restraints / parameters        | 7819 / 0 / 610                                                          |                     |
| Final R indices [ $F^2 > 2\sigma$ ]   | R1 = 0.0423, wR2 = 0.1022                                               |                     |
| R indices (all data)                  | R1 = 0.0589, wR2 = 0.1088                                               |                     |
| Goodness-of-fit on $F^2$              | 1.036                                                                   |                     |
| Absolute structure parameter          | 0.3(4)                                                                  |                     |
| Extinction coefficient                | 0.031(3)                                                                |                     |
| Largest and mean shift/su             | 0.001 and 0.000                                                         |                     |
| Largest diff. peak and hole           | 0.18 and -0.20 e Å <sup>-3</sup>                                        |                     |

**Table S4.** Crystal data and structure refinement from second experiment.

|                                       |                                                                                                 |                     |
|---------------------------------------|-------------------------------------------------------------------------------------------------|---------------------|
| Identification code                   | mjh73                                                                                           |                     |
| Chemical formula (moiety)             | $C_{21}H_{22}O_8 \cdot 0.42C_6D_6$                                                              |                     |
| Chemical formula (total)              | $C_{23.5}H_{22}D_{2.5}O_8$                                                                      |                     |
| Formula weight                        | 437.44                                                                                          |                     |
| Temperature                           | 100(2) K                                                                                        |                     |
| Radiation, wavelength                 | synchrotron, 1.4879 Å                                                                           |                     |
| Crystal system, space group           | orthorhombic, $P2_12_12_1$                                                                      |                     |
| Unit cell parameters                  | $a = 8.0059(3)$ Å                                                                               | $\alpha = 90^\circ$ |
|                                       | $b = 16.8978(7)$ Å                                                                              | $\beta = 90^\circ$  |
|                                       | $c = 31.9515(13)$ Å                                                                             | $\gamma = 90^\circ$ |
| Cell volume                           | $4322.5(3)$ Å <sup>3</sup>                                                                      |                     |
| Z                                     | 8                                                                                               |                     |
| Calculated density                    | $1.344$ g/cm <sup>3</sup>                                                                       |                     |
| Absorption coefficient $\mu$          | $0.760$ mm <sup>-1</sup>                                                                        |                     |
| F(000)                                | 1836                                                                                            |                     |
| Crystal colour and size               | yellow, $0.042 \times 0.031 \times 0.028$ mm <sup>3</sup>                                       |                     |
| Reflections for cell refinement       | 1717 ( $\theta$ range 2.8 to 25.0°)                                                             |                     |
| Data collection method                | fixed- $\chi$ diffractometer with Pilatus 2M detector<br>narrow-frame $\omega$ and $\phi$ scans |                     |
| $\theta$ range for data collection    | 2.7 to 65.8°                                                                                    |                     |
| Index ranges                          | $h -9$ to 9, $k -20$ to 20, $l -39$ to 39                                                       |                     |
| Completeness to $\theta = 63.2^\circ$ | 99.9 %                                                                                          |                     |
| Reflections collected                 | 48250                                                                                           |                     |
| Independent reflections               | 8060 ( $R_{int} = 0.0920$ )                                                                     |                     |
| Reflections with $F^2 > 2\sigma$      | 6155                                                                                            |                     |
| Absorption correction                 | none                                                                                            |                     |
| Structure solution                    | direct methods                                                                                  |                     |
| Refinement method                     | Full-matrix least-squares on $F^2$                                                              |                     |
| Weighting parameters a, b             | 0.0536,                                                                                         |                     |
| Data / restraints / parameters        | 8060 / 520 / 699                                                                                |                     |
| Final R indices [ $F^2 > 2\sigma$ ]   | $R1 = 0.0482$ , $wR2 = 0.0940$                                                                  |                     |
| R indices (all data)                  | $R1 = 0.0714$ , $wR2 = 0.0969$                                                                  |                     |
| Goodness-of-fit on $F^2$              | 0.999                                                                                           |                     |
| Absolute structure parameter          | 0.05(6)                                                                                         |                     |
| Extinction coefficient                | 0.00065(12)                                                                                     |                     |
| Largest and mean shift/su             | 0.001 and 0.000                                                                                 |                     |
| Largest diff. peak and hole           | 0.18 and $-0.17$ e Å <sup>-3</sup>                                                              |                     |

**Table S5.** Bond lengths (Å), bond angles and torsion angles (°) for tatiomicin at 150 K

|           |          |          |          |
|-----------|----------|----------|----------|
| C1–C2     | 1.520(4) | C1–C9A   | 1.479(4) |
| C1–O1     | 1.221(4) | C2–H2    | 1.000    |
| C2–C3     | 1.541(4) | C2–C15   | 1.533(5) |
| C3–C4     | 1.557(4) | C3–C14   | 1.511(5) |
| C3–O3     | 1.399(4) | C4A–C4   | 1.560(4) |
| C4A–C9A   | 1.500(4) | C4A–C10  | 1.540(4) |
| C4A–O4A   | 1.492(3) | C4–C11   | 1.516(4) |
| C4–O4     | 1.424(4) | C5–C6    | 1.389(5) |
| C5–C10A   | 1.407(5) | C5–O5    | 1.358(4) |
| C6–H6     | 0.950    | C6–C7    | 1.377(6) |
| C7–H7     | 0.950    | C7–C8    | 1.384(5) |
| C8A–C8    | 1.404(5) | C8A–C9   | 1.450(4) |
| C8A–C10A  | 1.400(5) | C8–O8    | 1.375(4) |
| C9A–C9    | 1.337(4) | C9–H9    | 0.950    |
| C10A–C10  | 1.510(5) | C10–H10  | 1.000    |
| C10–O10   | 1.437(4) | C11–H11  | 0.950    |
| C11–C12   | 1.314(5) | C12–H12  | 0.950    |
| C12–C13   | 1.491(5) | C13–H13A | 0.980    |
| C13–H13B  | 0.980    | C13–H13C | 0.980    |
| C14–O4A   | 1.350(3) | C14–O14  | 1.201(4) |
| C15–H15A  | 0.980    | C15–H15B | 0.980    |
| C15–H15C  | 0.980    | C16–H16A | 0.980    |
| C16–H16B  | 0.980    | C16–H16C | 0.980    |
| C16–O8    | 1.437(5) | C17–H17A | 0.980    |
| C17–H17B  | 0.980    | C17–H17C | 0.980    |
| C17–O5    | 1.438(4) | O3–H3O   | 0.85(5)  |
| O4–H4O    | 0.89(4)  | O10–H10O | 0.85(5)  |
| C21–C22   | 1.520(5) | C21–C29A | 1.472(5) |
| C21–O21   | 1.226(4) | C22–H22  | 1.000    |
| C22–C23   | 1.549(4) | C22–C35  | 1.535(5) |
| C23–C24   | 1.560(4) | C23–C34  | 1.518(5) |
| C23–O23   | 1.398(4) | C24A–C24 | 1.561(4) |
| C24A–C29A | 1.499(5) | C24A–C30 | 1.529(4) |
| C24A–O24A | 1.489(4) | C24–C31  | 1.508(5) |
| C24–O24   | 1.429(4) | C25–C26  | 1.407(6) |
| C25–C30A  | 1.384(5) | C25–O25  | 1.364(5) |
| C26–H26   | 0.950    | C26–C27  | 1.381(7) |
| C27–H27   | 0.950    | C27–C28  | 1.377(7) |
| C28A–C28  | 1.417(5) | C28A–C29 | 1.436(5) |
| C28A–C30A | 1.408(5) | C28–O28  | 1.377(6) |
| C29A–C29  | 1.341(5) | C29–H29  | 0.950    |
| C30–H30   | 1.000    | C30–C30A | 1.510(5) |
| C30–O30   | 1.442(4) | C31–H31  | 0.950    |
| C31–C32   | 1.325(5) | C32–H32  | 0.950    |
| C32–C33   | 1.485(6) | C33–H33A | 0.980    |
| C33–H33B  | 0.980    | C33–H33C | 0.980    |

|              |           |              |           |
|--------------|-----------|--------------|-----------|
| C34-O24A     | 1.336(4)  | C34-O34      | 1.203(4)  |
| C35-H35A     | 0.980     | C35-H35B     | 0.980     |
| C35-H35C     | 0.980     | C36-H36A     | 0.980     |
| C36-H36B     | 0.980     | C36-H36C     | 0.980     |
| C36-O28      | 1.442(5)  | C37-H37A     | 0.980     |
| C37-H37B     | 0.980     | C37-H37C     | 0.980     |
| C37-O25      | 1.418(5)  | O23-H23O     | 0.86(5)   |
| O24-H24O     | 0.90(5)   | O30-H30O     | 0.90(5)   |
| C41-D41      | 0.950     | C41-C42      | 1.338(11) |
| C41-C46      | 1.359(10) | C42-D42      | 0.950     |
| C42-C43      | 1.448(11) | C43-D43      | 0.950     |
| C43-C44      | 1.361(11) | C44-D44      | 0.950     |
| C44-C45      | 1.314(12) | C45-D45      | 0.950     |
| C45-C46      | 1.346(11) | C46-D46      | 0.950     |
|              |           |              |           |
| C2-C1-C9A    | 118.6(3)  | C2-C1-O1     | 119.4(3)  |
| C9A-C1-O1    | 122.0(3)  | C1-C2-H2     | 106.6     |
| C1-C2-C3     | 114.5(2)  | C1-C2-C15    | 109.5(3)  |
| H2-C2-C3     | 106.6     | H2-C2-C15    | 106.6     |
| C3-C2-C15    | 112.5(3)  | C2-C3-C4     | 110.6(2)  |
| C2-C3-C14    | 110.2(3)  | C2-C3-O3     | 106.8(2)  |
| C4-C3-C14    | 100.2(2)  | C4-C3-O3     | 115.4(3)  |
| C14-C3-O3    | 113.5(2)  | C4-C4A-C9A   | 109.9(2)  |
| C4-C4A-C10   | 115.9(2)  | C4-C4A-O4A   | 102.9(2)  |
| C9A-C4A-C10  | 115.0(2)  | C9A-C4A-O4A  | 107.3(2)  |
| C10-C4A-O4A  | 104.6(2)  | C3-C4-C4A    | 97.2(2)   |
| C3-C4-C11    | 116.4(3)  | C3-C4-O4     | 104.6(2)  |
| C4A-C4-C11   | 113.1(2)  | C4A-C4-O4    | 110.4(2)  |
| C11-C4-O4    | 113.7(2)  | C6-C5-C10A   | 118.6(3)  |
| C6-C5-O5     | 126.1(3)  | C10A-C5-O5   | 115.2(3)  |
| C5-C6-H6     | 119.3     | C5-C6-C7     | 121.3(3)  |
| H6-C6-C7     | 119.3     | C6-C7-H7     | 119.7     |
| C6-C7-C8     | 120.5(3)  | H7-C7-C8     | 119.7     |
| C8-C8A-C9    | 120.9(3)  | C8-C8A-C10A  | 119.6(3)  |
| C9-C8A-C10A  | 119.4(3)  | C7-C8-C8A    | 119.6(3)  |
| C7-C8-O8     | 125.1(3)  | C8A-C8-O8    | 115.3(3)  |
| C1-C9A-C4A   | 117.5(2)  | C1-C9A-C9    | 120.6(3)  |
| C4A-C9A-C9   | 121.6(3)  | C8A-C9-C9A   | 122.8(3)  |
| C8A-C9-H9    | 118.6     | C9A-C9-H9    | 118.6     |
| C5-C10A-C8A  | 120.2(3)  | C5-C10A-C10  | 119.3(3)  |
| C8A-C10A-C10 | 120.2(3)  | C4A-C10-C10A | 113.5(3)  |
| C4A-C10-H10  | 108.8     | C4A-C10-O10  | 106.3(2)  |
| C10A-C10-H10 | 108.8     | C10A-C10-O10 | 110.5(2)  |
| H10-C10-O10  | 108.8     | C4-C11-H11   | 115.8     |
| C4-C11-C12   | 128.4(3)  | H11-C11-C12  | 115.8     |
| C11-C12-H12  | 115.4     | C11-C12-C13  | 129.3(3)  |
| H12-C12-C13  | 115.4     | C12-C13-H13A | 109.5     |
| C12-C13-H13B | 109.5     | C12-C13-H13C | 109.5     |

|               |          |                |          |
|---------------|----------|----------------|----------|
| H13A-C13-H13B | 109.5    | H13A-C13-H13C  | 109.5    |
| H13B-C13-H13C | 109.5    | C3-C14-O4A     | 109.5(2) |
| C3-C14-O14    | 128.8(3) | O4A-C14-O14    | 121.7(3) |
| C2-C15-H15A   | 109.5    | C2-C15-H15B    | 109.5    |
| C2-C15-H15C   | 109.5    | H15A-C15-H15B  | 109.5    |
| H15A-C15-H15C | 109.5    | H15B-C15-H15C  | 109.5    |
| H16A-C16-H16B | 109.5    | H16A-C16-H16C  | 109.5    |
| H16A-C16-O8   | 109.5    | H16B-C16-H16C  | 109.5    |
| H16B-C16-O8   | 109.5    | H16C-C16-O8    | 109.5    |
| H17A-C17-H17B | 109.5    | H17A-C17-H17C  | 109.5    |
| H17A-C17-O5   | 109.5    | H17B-C17-H17C  | 109.5    |
| H17B-C17-O5   | 109.5    | H17C-C17-O5    | 109.5    |
| C3-O3-H3O     | 100(3)   | C4-O4-H4O      | 108(3)   |
| C4A-O4A-C14   | 108.7(2) | C5-O5-C17      | 117.5(3) |
| C8-O8-C16     | 118.2(3) | C10-O10-H10O   | 100(3)   |
| C22-C21-C29A  | 119.2(3) | C22-C21-O21    | 119.0(3) |
| C29A-C21-O21  | 121.8(3) | C21-C22-H22    | 106.2    |
| C21-C22-C23   | 114.4(3) | C21-C22-C35    | 111.0(3) |
| H22-C22-C23   | 106.2    | H22-C22-C35    | 106.2    |
| C23-C22-C35   | 112.3(3) | C22-C23-C24    | 109.5(2) |
| C22-C23-C34   | 110.3(3) | C22-C23-O23    | 107.4(3) |
| C24-C23-C34   | 100.4(2) | C24-C23-O23    | 115.9(3) |
| C34-C23-O23   | 113.2(3) | C24-C24A-C29A  | 110.1(3) |
| C24-C24A-C30  | 114.9(3) | C24-C24A-O24A  | 103.2(2) |
| C29A-C24A-C30 | 115.5(3) | C29A-C24A-O24A | 107.4(2) |
| C30-C24A-O24A | 104.5(2) | C23-C24-C24A   | 97.0(2)  |
| C23-C24-C31   | 117.3(3) | C23-C24-O24    | 104.3(2) |
| C24A-C24-C31  | 113.4(2) | C24A-C24-O24   | 110.3(2) |
| C31-C24-O24   | 113.2(2) | C26-C25-C30A   | 118.7(4) |
| C26-C25-O25   | 125.7(4) | C30A-C25-O25   | 115.5(3) |
| C25-C26-H26   | 119.5    | C25-C26-C27    | 121.0(4) |
| H26-C26-C27   | 119.5    | C26-C27-H27    | 119.7    |
| C26-C27-C28   | 120.6(4) | H27-C27-C28    | 119.7    |
| C28-C28A-C29  | 120.6(4) | C28-C28A-C30A  | 119.1(4) |
| C29-C28A-C30A | 120.1(3) | C27-C28-C28A   | 119.7(4) |
| C27-C28-O28   | 124.9(4) | C28A-C28-O28   | 115.4(4) |
| C21-C29A-C24A | 117.3(3) | C21-C29A-C29   | 121.1(3) |
| C24A-C29A-C29 | 121.3(3) | C28A-C29-C29A  | 122.7(3) |
| C28A-C29-H29  | 118.7    | C29A-C29-H29   | 118.7    |
| C24A-C30-H30  | 108.8    | C24A-C30-C30A  | 113.6(3) |
| C24A-C30-O30  | 107.2(3) | H30-C30-C30A   | 108.8    |
| H30-C30-O30   | 108.8    | C30A-C30-O30   | 109.7(2) |
| C25-C30A-C28A | 120.8(3) | C25-C30A-C30   | 119.6(4) |
| C28A-C30A-C30 | 119.2(3) | C24-C31-H31    | 115.9    |
| C24-C31-C32   | 128.2(3) | H31-C31-C32    | 115.9    |
| C31-C32-H32   | 115.6    | C31-C32-C33    | 128.7(4) |
| H32-C32-C33   | 115.6    | C32-C33-H33A   | 109.5    |
| C32-C33-H33B  | 109.5    | C32-C33-H33C   | 109.5    |

|                |           |                |           |
|----------------|-----------|----------------|-----------|
| H33A-C33-H33B  | 109.5     | H33A-C33-H33C  | 109.5     |
| H33B-C33-H33C  | 109.5     | C23-C34-O24A   | 109.7(3)  |
| C23-C34-O34    | 127.6(3)  | O24A-C34-O34   | 122.6(3)  |
| C22-C35-H35A   | 109.5     | C22-C35-H35B   | 109.5     |
| C22-C35-H35C   | 109.5     | H35A-C35-H35B  | 109.5     |
| H35A-C35-H35C  | 109.5     | H35B-C35-H35C  | 109.5     |
| H36A-C36-H36B  | 109.5     | H36A-C36-H36C  | 109.5     |
| H36A-C36-O28   | 109.5     | H36B-C36-H36C  | 109.5     |
| H36B-C36-O28   | 109.5     | H36C-C36-O28   | 109.5     |
| H37A-C37-H37B  | 109.5     | H37A-C37-H37C  | 109.5     |
| H37A-C37-O25   | 109.5     | H37B-C37-H37C  | 109.5     |
| H37B-C37-O25   | 109.5     | H37C-C37-O25   | 109.5     |
| C23-O23-H23O   | 105(3)    | C24-O24-H24O   | 104(3)    |
| C24A-O24A-C34  | 109.0(2)  | C25-O25-C37    | 117.5(4)  |
| C28-O28-C36    | 117.9(4)  | C30-O30-H30O   | 106(3)    |
| D41-C41-C42    | 120.4     | D41-C41-C46    | 120.4     |
| C42-C41-C46    | 119.2(7)  | C41-C42-D42    | 120.4     |
| C41-C42-C43    | 119.3(7)  | D42-C42-C43    | 120.4     |
| C42-C43-D43    | 121.4     | C42-C43-C44    | 117.1(7)  |
| D43-C43-C44    | 121.4     | C43-C44-D44    | 118.8     |
| C43-C44-C45    | 122.4(8)  | D44-C44-C45    | 118.8     |
| C44-C45-D45    | 120.2     | C44-C45-C46    | 119.6(8)  |
| D45-C45-C46    | 120.2     | C41-C46-C45    | 122.4(9)  |
| C41-C46-D46    | 118.8     | C45-C46-D46    | 118.8     |
|                |           |                |           |
| C9A-C1-C2-C3   | 5.8(4)    | C9A-C1-C2-C15  | -121.6(3) |
| O1-C1-C2-C3    | -175.9(3) | O1-C1-C2-C15   | 56.7(4)   |
| C1-C2-C3-C4    | 36.1(4)   | C1-C2-C3-C14   | -73.8(3)  |
| C1-C2-C3-O3    | 162.5(3)  | C15-C2-C3-C4   | 162.0(3)  |
| C15-C2-C3-C14  | 52.1(3)   | C15-C2-C3-O3   | -71.7(3)  |
| C2-C3-C4-C4A   | -73.0(3)  | C2-C3-C4-C11   | 47.3(4)   |
| C2-C3-C4-O4    | 173.7(2)  | C14-C3-C4-C4A  | 43.3(3)   |
| C14-C3-C4-C11  | 163.6(3)  | C14-C3-C4-O4   | -70.0(3)  |
| O3-C3-C4-C4A   | 165.7(2)  | O3-C3-C4-C11   | -74.1(3)  |
| O3-C3-C4-O4    | 52.3(3)   | C9A-C4A-C4-C3  | 73.2(3)   |
| C9A-C4A-C4-C11 | -49.5(3)  | C9A-C4A-C4-O4  | -178.2(2) |
| C10-C4A-C4-C3  | -154.4(2) | C10-C4A-C4-C11 | 82.9(3)   |
| C10-C4A-C4-O4  | -45.8(3)  | O4A-C4A-C4-C3  | -40.9(3)  |
| O4A-C4A-C4-C11 | -163.6(2) | O4A-C4A-C4-O4  | 67.7(3)   |
| C10A-C5-C6-C7  | 0.6(5)    | O5-C5-C6-C7    | -177.6(3) |
| C5-C6-C7-C8    | -0.6(6)   | C6-C7-C8-C8A   | -0.5(5)   |
| C6-C7-C8-O8    | 179.4(3)  | C9-C8A-C8-C7   | -174.7(3) |
| C9-C8A-C8-O8   | 5.5(4)    | C10A-C8A-C8-C7 | 1.6(5)    |
| C10A-C8A-C8-O8 | -178.2(3) | C2-C1-C9A-C4A  | -5.3(4)   |
| C2-C1-C9A-C9   | 169.5(3)  | O1-C1-C9A-C4A  | 176.5(3)  |
| O1-C1-C9A-C9   | -8.7(5)   | C4-C4A-C9A-C1  | -37.0(3)  |
| C4-C4A-C9A-C9  | 148.2(3)  | C10-C4A-C9A-C1 | -169.9(3) |

|                    |           |                    |           |
|--------------------|-----------|--------------------|-----------|
| C10-C4A-C9A-C9     | 15.3(4)   | O4A-C4A-C9A-C1     | 74.2(3)   |
| O4A-C4A-C9A-C9     | -100.6(3) | C1-C9A-C9-C8A      | -171.2(3) |
| C4A-C9A-C9-C8A     | 3.4(4)    | C8-C8A-C9-C9A      | 170.3(3)  |
| C10A-C8A-C9-C9A    | -6.0(4)   | C8-C8A-C10A-C5     | -1.7(4)   |
| C8-C8A-C10A-C10    | 172.1(3)  | C9-C8A-C10A-C5     | 174.7(3)  |
| C9-C8A-C10A-C10    | -11.5(4)  | C6-C5-C10A-C8A     | 0.6(5)    |
| C6-C5-C10A-C10     | -173.3(3) | O5-C5-C10A-C8A     | 178.9(3)  |
| O5-C5-C10A-C10     | 5.1(4)    | C5-C10A-C10-C4A    | -157.0(3) |
| C5-C10A-C10-O10    | 83.7(3)   | C8A-C10A-C10-C4A   | 29.1(4)   |
| C8A-C10A-C10-O10   | -90.2(3)  | C4-C4A-C10-C10A    | -160.0(3) |
| C4-C4A-C10-O10     | -38.4(3)  | C9A-C4A-C10-C10A   | -30.0(4)  |
| C9A-C4A-C10-O10    | 91.6(3)   | O4A-C4A-C10-C10A   | 87.4(3)   |
| O4A-C4A-C10-O10    | -150.9(2) | C3-C4-C11-C12      | 79.0(4)   |
| C4A-C4-C11-C12     | -169.6(3) | O4-C4-C11-C12      | -42.6(5)  |
| C4-C11-C12-C13     | -0.2(7)   | C2-C3-C14-O4A      | 83.7(3)   |
| C2-C3-C14-O14      | -95.6(4)  | C4-C3-C14-O4A      | -32.9(3)  |
| C4-C3-C14-O14      | 147.8(3)  | O3-C3-C14-O4A      | -156.5(2) |
| O3-C3-C14-O14      | 24.2(5)   | C3-C14-O4A-C4A     | 6.2(3)    |
| O14-C14-O4A-C4A    | -174.4(3) | C4-C4A-O4A-C14     | 23.1(3)   |
| C9A-C4A-O4A-C14    | -92.8(3)  | C10-C4A-O4A-C14    | 144.6(2)  |
| C6-C5-O5-C17       | 7.0(5)    | C10A-C5-O5-C17     | -171.1(3) |
| C7-C8-O8-C16       | -0.6(5)   | C8A-C8-O8-C16      | 179.2(3)  |
| C29A-C21-C22-C23   | -1.2(5)   | C29A-C21-C22-C35   | -129.6(3) |
| O21-C21-C22-C23    | 178.1(3)  | O21-C21-C22-C35    | 49.8(5)   |
| C21-C22-C23-C24    | 40.4(4)   | C21-C22-C23-C34    | -69.1(4)  |
| C21-C22-C23-O23    | 167.1(3)  | C35-C22-C23-C24    | 168.1(3)  |
| C35-C22-C23-C34    | 58.5(4)   | C35-C22-C23-O23    | -65.3(4)  |
| C22-C23-C24-C24A   | -73.8(3)  | C22-C23-C24-C31    | 47.1(4)   |
| C22-C23-C24-O24    | 173.1(3)  | C34-C23-C24-C24A   | 42.3(3)   |
| C34-C23-C24-C31    | 163.1(3)  | C34-C23-C24-O24    | -70.9(3)  |
| O23-C23-C24-C24A   | 164.6(3)  | O23-C23-C24-C31    | -74.6(4)  |
| O23-C23-C24-O24    | 51.5(3)   | C29A-C24A-C24-C23  | 73.9(3)   |
| C29A-C24A-C24-C31  | -49.9(3)  | C29A-C24A-C24-O24  | -178.0(2) |
| C30-C24A-C24-C23   | -153.6(3) | C30-C24A-C24-C31   | 82.6(3)   |
| C30-C24A-C24-O24   | -45.5(3)  | O24A-C24A-C24-C23  | -40.5(3)  |
| O24A-C24A-C24-C31  | -164.3(2) | O24A-C24A-C24-O24  | 67.6(3)   |
| C30A-C25-C26-C27   | 1.9(6)    | O25-C25-C26-C27    | -176.6(4) |
| C25-C26-C27-C28    | -1.7(7)   | C26-C27-C28-C28A   | -0.3(6)   |
| C26-C27-C28-O28    | 178.5(4)  | C29-C28A-C28-C27   | -173.2(4) |
| C29-C28A-C28-O28   | 7.9(5)    | C30A-C28A-C28-C27  | 2.0(5)    |
| C30A-C28A-C28-O28  | -176.9(3) | C22-C21-C29A-C24A  | 1.0(4)    |
| C22-C21-C29A-C29   | 173.8(3)  | O21-C21-C29A-C24A  | -178.3(3) |
| O21-C21-C29A-C29   | -5.6(5)   | C24-C24A-C29A-C21  | -40.1(4)  |
| C24-C24A-C29A-C29  | 147.2(3)  | C30-C24A-C29A-C21  | -172.2(3) |
| C30-C24A-C29A-C29  | 15.0(4)   | O24A-C24A-C29A-C21 | 71.6(3)   |
| O24A-C24A-C29A-C29 | -101.2(3) | C21-C29A-C29-C28A  | -169.5(3) |

|                    |           |                    |           |
|--------------------|-----------|--------------------|-----------|
| C24A–C29A–C29–C28A | 2.9(5)    | C28–C28A–C29–C29A  | 171.0(3)  |
| C30A–C28A–C29–C29A | –4.1(5)   | C24–C24A–C30–C30A  | –160.0(3) |
| C24–C24A–C30–O30   | –38.7(3)  | C29A–C24A–C30–C30A | –30.1(4)  |
| C29A–C24A–C30–O30  | 91.2(3)   | O24A–C24A–C30–C30A | 87.7(3)   |
| O24A–C24A–C30–O30  | –151.0(2) | C26–C25–C30A–C28A  | –0.2(5)   |
| C26–C25–C30A–C30   | –173.2(3) | O25–C25–C30A–C28A  | 178.5(3)  |
| O25–C25–C30A–C30   | 5.5(5)    | C28–C28A–C30A–C25  | –1.7(5)   |
| C28–C28A–C30A–C30  | 171.3(3)  | C29–C28A–C30A–C25  | 173.5(3)  |
| C29–C28A–C30A–C30  | –13.5(5)  | C24A–C30–C30A–C25  | –156.8(3) |
| C24A–C30–C30A–C28A | 30.0(4)   | O30–C30–C30A–C25   | 83.3(4)   |
| O30–C30–C30A–C28A  | –89.8(4)  | C23–C24–C31–C32    | 77.2(4)   |
| C24A–C24–C31–C32   | –171.0(3) | O24–C24–C31–C32    | –44.4(5)  |
| C24–C31–C32–C33    | –1.4(7)   | C22–C23–C34–O24A   | 83.8(3)   |
| C22–C23–C34–O34    | –96.4(4)  | C24–C23–C34–O24A   | –31.7(3)  |
| C24–C23–C34–O34    | 148.1(3)  | O23–C23–C34–O24A   | –155.9(3) |
| O23–C23–C34–O34    | 23.9(5)   | C23–C34–O24A–C24A  | 5.2(3)    |
| O34–C34–O24A–C24A  | –174.7(3) | C24–C24A–O24A–C34  | 23.7(3)   |
| C29A–C24A–O24A–C34 | –92.6(3)  | C30–C24A–O24A–C34  | 144.2(3)  |
| C26–C25–O25–C37    | 5.7(6)    | C30A–C25–O25–C37   | –172.9(4) |
| C27–C28–O28–C36    | 8.4(6)    | C28A–C28–O28–C36   | –172.8(4) |
| C46–C41–C42–C43    | 1.0(10)   | C41–C42–C43–C44    | –1.3(9)   |
| C42–C43–C44–C45    | 1.9(11)   | C43–C44–C45–C46    | –2.2(15)  |
| C44–C45–C46–C41    | 1.8(15)   | C42–C41–C46–C45    | –1.3(13)  |

Hydrogen bonds for (–)-tatiomicin [Å and °].

| D–H...A         | d(D–H)  | d(H...A) | d(D...A) | <(DHA) |
|-----------------|---------|----------|----------|--------|
| O3–H3O...O14    | 0.85(5) | 2.47(5)  | 2.880(3) | 110(4) |
| O3–H3O...O24a   | 0.85(5) | 2.01(5)  | 2.781(3) | 150(4) |
| O4–H4O...O10    | 0.89(4) | 2.33(4)  | 2.948(3) | 126(3) |
| O4–H4O...O30    | 0.89(4) | 2.13(4)  | 2.809(3) | 133(3) |
| O10–H10O...O14b | 0.85(5) | 1.99(5)  | 2.834(3) | 169(4) |
| O23–H23O...O34  | 0.86(5) | 2.48(4)  | 2.859(4) | 107(3) |
| O23–H23O...O4b  | 0.86(5) | 2.01(5)  | 2.834(3) | 159(4) |
| O24–H24O...O10  | 0.90(5) | 2.23(5)  | 2.865(3) | 127(4) |
| O24–H24O...O30  | 0.90(5) | 2.30(5)  | 2.930(3) | 126(3) |
| O30–H30O...O34a | 0.90(5) | 1.91(5)  | 2.814(3) | 174(4) |

Symmetry operations for equivalent atoms

a  $x-1,y,z$     b  $x+1,y,z$



## Computational Methods

### Conformers of Tatiomicin

**Table S6** Relative enthalpies ( $\Delta H_{298K}$ ) and the corresponding Boltzmann weights of tatiomicin calculated within the IEFPCM of chloroform.

| Conformer | $\Delta H_{298K}^a$<br>[kcal mol <sup>-1</sup> ] | Pop- $\Delta H$<br>[%] |
|-----------|--------------------------------------------------|------------------------|
| 1         | 0.00                                             | 77.1                   |
| 2         | 0.89                                             | 17.2                   |
| 3         | 1.65                                             | 4.8                    |
| 4         | 3.17                                             | 0.4                    |
| 5         | 3.26                                             | 0.3                    |
| 6         | 3.42                                             | 0.2                    |

<sup>a</sup>Referenced to H = -1414.649964 hartree

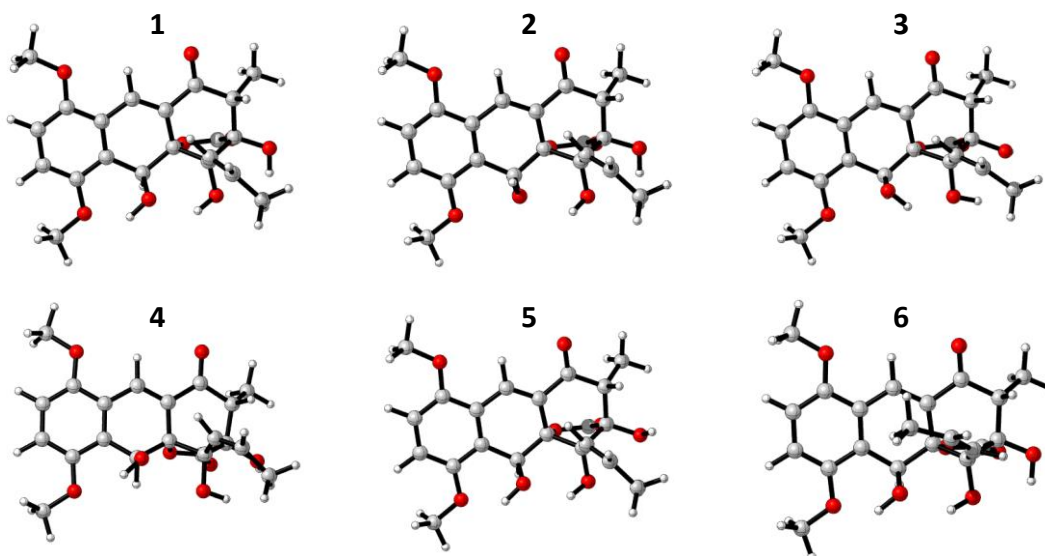

**Figure S29** 3D representations of the optimized structures, prepared using CYLview<sup>9</sup>

### Conformers of Tatiomicin\*

**Table S7** Relative enthalpies ( $\Delta H_{298K}$ ) and the corresponding Boltzmann weights of the minor C-2 epimer of (-) **3** calculated within the IEFPCM of chloroform.

| Conformer | $\Delta H_{298K}^a$<br>[kcal mol <sup>-1</sup> ] | Pop- $\Delta H$<br>[%] |
|-----------|--------------------------------------------------|------------------------|
| 1         | 0.00                                             | 83.1                   |
| 2         | 1.19                                             | 11.1                   |
| 3         | 1.73                                             | 4.5                    |
| 4         | 3.05                                             | 0.5                    |
| 5         | 3.29                                             | 0.3                    |
| 6         | 3.33                                             | 0.3                    |
| 7         | 3.73                                             | 0.2                    |

<sup>a</sup>Referenced to H = -1415.199655 hartree

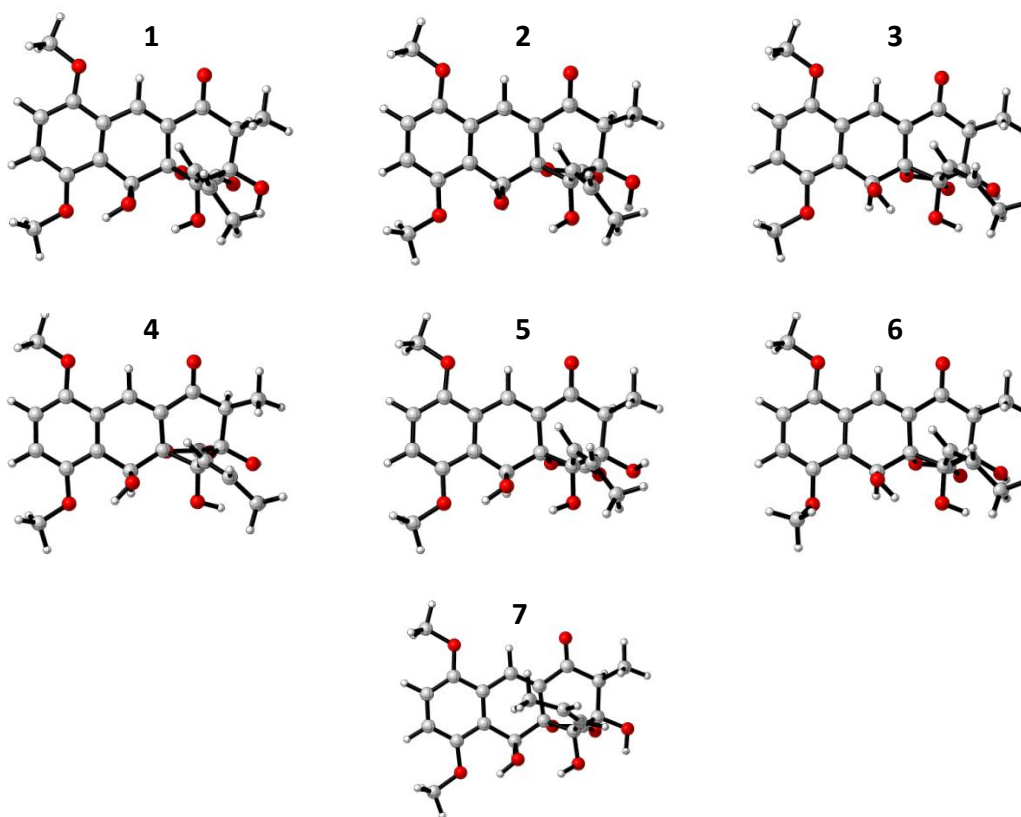

**Figure S30** 3D representations of the optimized structures were prepared using CYLview<sup>9</sup>

### Experimental and Calculated VCD and ECD Spectra

IR and VCD spectra were recorded on a dual PEM ChiralIR-2X spectrometer (Biotoools Inc., Jupiter, FL). All measurements were performed in  $\text{CDCl}_3$  with a concentration of 0.1 M. A cell with 100  $\mu\text{m}$  path length and  $\text{BaF}_2$  windows was used. Both the sample and the solvent spectrum were recorded with a resolution of  $4\text{ cm}^{-1}$ , totaling 30 000 scans each with both PEMs optimized at  $1400\text{ cm}^{-1}$ . The final baseline-corrected VCD spectrum was obtained through subtraction of the solvent spectrum.

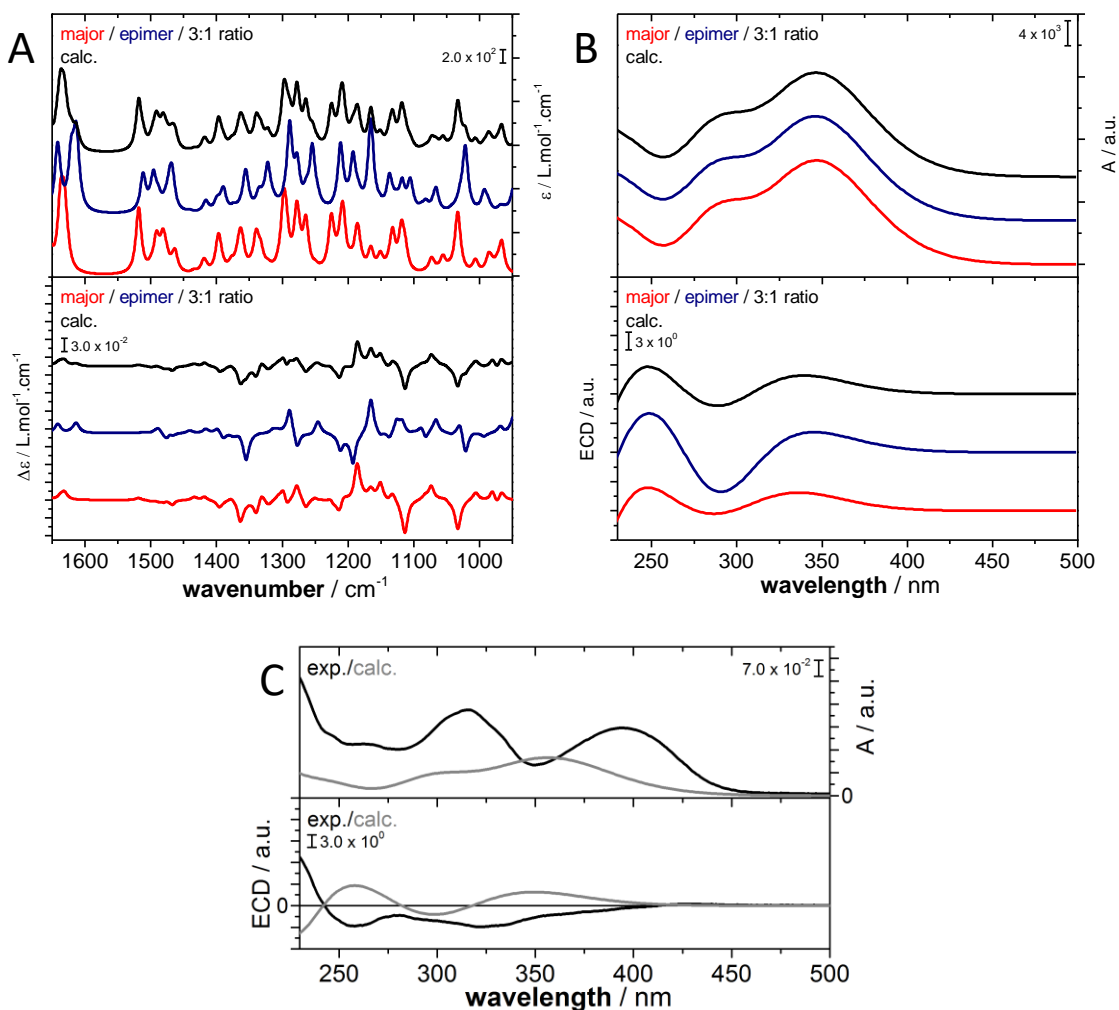

**Figure S31** Calculated VCD (A) and ECD (B) spectra for tatiomicin, tatiomicin\* and a 3:1 mixture of tatiomicin:tatiomicin\* as found in isolated samples, and comparison between experimental and calculated ECD (C).

**Table S8** Cartesian coordinates of calculated conformersTatiomicin (**3**) Conformer 1

|   |          |          |          |
|---|----------|----------|----------|
| C | -4.54314 | 0.45963  | 0.12473  |
| C | -4.36309 | -0.89022 | -0.17258 |
| C | -3.08259 | -1.41420 | -0.31674 |
| C | -1.96787 | -0.58164 | -0.17678 |
| C | -2.14060 | 0.77010  | 0.13898  |
| C | -3.44580 | 1.29724  | 0.28956  |
| C | -0.59839 | -1.19424 | -0.34070 |
| C | 0.57996  | -0.20039 | -0.37311 |
| C | 0.27882  | 1.19116  | 0.10272  |
| C | -0.98415 | 1.61526  | 0.30441  |
| C | 1.89619  | -0.72739 | 0.28539  |
| C | 2.88964  | 0.17544  | -0.49521 |
| C | 2.83098  | 1.62665  | 0.01311  |
| C | 1.40912  | 2.13924  | 0.25513  |
| O | -3.52976 | 2.61381  | 0.58639  |
| O | -2.80845 | -2.72887 | -0.56795 |
| C | -4.81748 | 3.19184  | 0.74988  |
| C | -3.89534 | -3.61790 | -0.79928 |
| O | -0.35912 | -2.16043 | 0.69191  |
| O | 1.23602  | 3.30064  | 0.58165  |
| C | 1.91837  | -0.58439 | 1.78416  |
| C | 2.72983  | -1.18146 | 2.66308  |
| C | 3.83975  | -2.15803 | 2.44641  |
| O | 2.19019  | -2.03478 | -0.17211 |
| O | 4.21522  | -0.25021 | -0.43785 |
| C | 3.63865  | 2.60749  | -0.83907 |
| O | 0.95410  | -0.08145 | -1.79352 |
| C | 2.28855  | 0.07184  | -1.90473 |
| O | 2.85025  | 0.11377  | -2.96316 |
| H | -5.55137 | 0.83872  | 0.22901  |
| H | -5.23643 | -1.52042 | -0.28375 |
| H | -0.57246 | -1.70552 | -1.30959 |
| H | -1.13827 | 2.64778  | 0.59700  |
| H | 3.28493  | 1.58498  | 1.01297  |
| H | -4.64377 | 4.24137  | 0.98089  |
| H | -5.40499 | 3.11476  | -0.17059 |
| H | -5.35975 | 2.72232  | 1.57690  |
| H | -3.44763 | -4.58762 | -1.00980 |
| H | -4.53595 | -3.69706 | 0.08450  |
| H | -4.48723 | -3.29563 | -1.66122 |
| H | -1.05831 | -2.82207 | 0.59971  |
| H | 1.17777  | 0.09859  | 2.19169  |
| H | 2.55800  | -0.91986 | 3.70699  |
| H | 4.78455  | -1.73048 | 2.80115  |
| H | 3.66724  | -3.06058 | 3.04421  |

|   |         |          |          |
|---|---------|----------|----------|
| H | 3.95689 | -2.44726 | 1.40491  |
| H | 1.49503 | -2.60140 | 0.19827  |
| H | 4.23441 | -1.18084 | -0.69300 |
| H | 3.63095 | 3.58984  | -0.36594 |
| H | 4.67046 | 2.26614  | -0.92958 |
| H | 3.21996 | 2.70824  | -1.84362 |

Tatiomicin (**3**) Conformer 2

|   |          |          |          |
|---|----------|----------|----------|
| C | -4.53525 | 0.41307  | 0.08560  |
| C | -4.34092 | -0.92762 | -0.23751 |
| C | -3.05704 | -1.46832 | -0.30729 |
| C | -1.95254 | -0.64557 | -0.05266 |
| C | -2.13998 | 0.71215  | 0.24992  |
| C | -3.44827 | 1.24447  | 0.33060  |
| C | -0.57041 | -1.24505 | -0.04092 |
| C | 0.56570  | -0.22936 | -0.26112 |
| C | 0.27098  | 1.17411  | 0.17285  |
| C | -0.99428 | 1.57721  | 0.40801  |
| C | 1.94274  | -0.69748 | 0.30724  |
| C | 2.84041  | 0.16963  | -0.61558 |
| C | 2.79047  | 1.64717  | -0.17799 |
| C | 1.39309  | 2.13954  | 0.21507  |
| O | -3.54696 | 2.55936  | 0.63499  |
| O | -2.79211 | -2.76246 | -0.61299 |
| C | -4.83970 | 3.14586  | 0.69552  |
| C | -3.87900 | -3.61843 | -0.93226 |
| O | -0.35467 | -2.00772 | 1.15023  |
| O | 1.23847  | 3.30032  | 0.55316  |
| C | 2.11149  | -0.45538 | 1.78412  |
| C | 3.00304  | -0.99978 | 2.61959  |
| C | 4.08718  | -1.99574 | 2.36486  |
| O | 2.20602  | -2.03223 | -0.08352 |
| O | 4.17769  | -0.21947 | -0.65940 |
| C | 3.45069  | 2.60190  | -1.17549 |
| O | 0.80092  | -0.19220 | -1.71248 |
| C | 2.11560  | -0.02645 | -1.95554 |
| O | 2.58004  | -0.04281 | -3.06056 |
| H | -5.54703 | 0.79432  | 0.13334  |
| H | -5.20951 | -1.54430 | -0.43056 |
| H | -0.49037 | -1.97290 | -0.84966 |
| H | -1.16600 | 2.61402  | 0.67485  |
| H | 3.36909  | 1.67373  | 0.75520  |
| H | -4.67832 | 4.19369  | 0.94278  |
| H | -5.35146 | 3.07463  | -0.26958 |
| H | -5.45085 | 2.67883  | 1.47464  |
| H | -4.56217 | -3.72742 | -0.08345 |
| H | -4.42969 | -3.25395 | -1.80580 |
| H | -3.43654 | -4.58605 | -1.16343 |

|   |          |          |          |
|---|----------|----------|----------|
| H | -0.60966 | -1.48200 | 1.91622  |
| H | 1.42574  | 0.27037  | 2.21443  |
| H | 2.93438  | -0.66570 | 3.65459  |
| H | 5.05707  | -1.55903 | 2.62839  |
| H | 3.95644  | -2.86830 | 3.01548  |
| H | 4.12634  | -2.33306 | 1.33200  |
| H | 1.64673  | -2.59591 | 0.46822  |
| H | 4.20634  | -1.15619 | -0.88898 |
| H | 3.47704  | 3.60647  | -0.75209 |
| H | 4.47119  | 2.27854  | -1.38408 |
| H | 2.90203  | 2.64230  | -2.11997 |

Tatiomicin (**3**) Conformer 3

|   |          |          |          |
|---|----------|----------|----------|
| C | -4.53756 | 0.41213  | 0.03378  |
| C | -4.33978 | -0.93823 | -0.24471 |
| C | -3.05652 | -1.48512 | -0.26471 |
| C | -1.95722 | -0.65883 | -0.00964 |
| C | -2.14684 | 0.70468  | 0.25730  |
| C | -3.45387 | 1.24531  | 0.28623  |
| C | -0.57919 | -1.26100 | 0.06550  |
| C | 0.54846  | -0.24947 | -0.20412 |
| C | 0.26695  | 1.15516  | 0.23377  |
| C | -1.00207 | 1.56397  | 0.44192  |
| C | 1.94234  | -0.71213 | 0.31125  |
| C | 2.79517  | 0.15641  | -0.64463 |
| C | 2.77107  | 1.63193  | -0.18704 |
| C | 1.38974  | 2.11516  | 0.27891  |
| O | -3.55440 | 2.56882  | 0.55204  |
| O | -2.79004 | -2.79155 | -0.51911 |
| C | -4.84714 | 3.15638  | 0.58611  |
| C | -3.87559 | -3.65606 | -0.81583 |
| O | -0.45009 | -1.83447 | 1.36095  |
| O | 1.25317  | 3.26584  | 0.65741  |
| C | 2.14221  | -0.47869 | 1.79232  |
| C | 3.12833  | -0.94179 | 2.56588  |
| C | 4.31849  | -1.77382 | 2.20846  |
| O | 2.07858  | -2.07828 | -0.05640 |
| O | 4.10807  | -0.32418 | -0.77804 |
| C | 3.37244  | 2.60095  | -1.20674 |
| O | 0.72850  | -0.21691 | -1.67283 |
| C | 2.02343  | -0.04770 | -1.94503 |
| O | 2.49633  | -0.07951 | -3.05075 |
| H | -5.54875 | 0.79780  | 0.04422  |
| H | -5.20599 | -1.55759 | -0.43996 |
| H | -0.48650 | -2.03772 | -0.69872 |
| H | -1.17433 | 2.60241  | 0.70212  |
| H | 3.39652  | 1.64955  | 0.71491  |
| H | -4.68871 | 4.20839  | 0.81736  |

|   |          |          |          |
|---|----------|----------|----------|
| H | -5.34720 | 3.06889  | -0.38392 |
| H | -5.46823 | 2.70282  | 1.36533  |
| H | -4.57225 | -3.72346 | 0.02646  |
| H | -4.41186 | -3.33005 | -1.71352 |
| H | -3.43512 | -4.63545 | -0.99632 |
| H | 0.30395  | -2.43720 | 1.33153  |
| H | 1.36794  | 0.10728  | 2.27827  |
| H | 3.05274  | -0.69012 | 3.62281  |
| H | 4.18334  | -2.80536 | 2.55513  |
| H | 4.53959  | -1.78491 | 1.14149  |
| H | 5.20601  | -1.38912 | 2.72055  |
| H | 3.01926  | -2.25759 | -0.17713 |
| H | 4.31217  | -0.34907 | -1.72395 |
| H | 3.40998  | 3.60244  | -0.77675 |
| H | 4.38920  | 2.29851  | -1.46516 |
| H | 2.78039  | 2.64604  | -2.12482 |

Tatiomicin (**3**) Conformer 4

|   |          |          |          |
|---|----------|----------|----------|
| C | 4.52756  | 0.40529  | 0.02791  |
| C | 4.32780  | -0.95045 | 0.28092  |
| C | 3.04575  | -1.49702 | 0.25342  |
| C | 1.95000  | -0.66839 | -0.00143 |
| C | 2.14383  | 0.69287  | -0.27275 |
| C | 3.44962  | 1.23622  | -0.25885 |
| C | 0.57165  | -1.27412 | -0.11758 |
| C | -0.54740 | -0.26825 | 0.15119  |
| C | -0.27273 | 1.11434  | -0.36793 |
| C | 0.99988  | 1.53272  | -0.53557 |
| C | -1.97480 | -0.75119 | -0.24508 |
| C | -2.75256 | 0.21872  | 0.68473  |
| C | -2.74960 | 1.64815  | 0.10533  |
| C | -1.39426 | 2.07007  | -0.47516 |
| O | 3.55483  | 2.55952  | -0.52063 |
| O | 2.76841  | -2.81830 | 0.43312  |
| C | 4.84654  | 3.15093  | -0.51667 |
| C | 3.83864  | -3.69483 | 0.75516  |
| O | 0.38583  | -1.78720 | -1.43466 |
| O | -1.26982 | 3.17361  | -0.97781 |
| C | -2.25593 | -0.62712 | -1.72486 |
| C | -3.29886 | -1.10990 | -2.40494 |
| C | -4.48683 | -1.88067 | -1.92467 |
| O | -2.14065 | -2.06524 | 0.25467  |
| O | -4.05945 | -0.23195 | 0.94282  |
| C | -3.27672 | 2.70791  | 1.07526  |
| O | -0.63650 | -0.15019 | 1.62253  |
| C | -1.90583 | 0.09711  | 1.95092  |
| O | -2.31030 | 0.17485  | 3.08154  |
| H | 5.53670  | 0.79535  | 0.05578  |

|   |          |          |          |
|---|----------|----------|----------|
| H | 5.18991  | -1.57071 | 0.49185  |
| H | 0.45287  | -2.07378 | 0.61737  |
| H | 1.17206  | 2.56299  | -0.82656 |
| H | -3.42913 | 1.59882  | -0.75498 |
| H | 4.69199  | 4.20213  | -0.75401 |
| H | 5.31705  | 3.06625  | 0.46823  |
| H | 5.49204  | 2.69795  | -1.27609 |
| H | 4.57977  | -3.73005 | -0.05023 |
| H | 4.32357  | -3.40028 | 1.69153  |
| H | 3.39103  | -4.68005 | 0.87602  |
| H | 0.94544  | -2.56662 | -1.51473 |
| H | -1.49489 | -0.10555 | -2.29732 |
| H | -3.27936 | -0.93478 | -3.47997 |
| H | -4.41009 | -2.92997 | -2.23385 |
| H | -4.62514 | -1.84333 | -0.84529 |
| H | -5.39734 | -1.48627 | -2.38748 |
| H | -3.05984 | -2.14158 | 0.54153  |
| H | -4.21135 | -0.14970 | 1.89532  |
| H | -3.33053 | 3.67089  | 0.56619  |
| H | -4.27895 | 2.44406  | 1.41888  |
| H | -2.62909 | 2.81919  | 1.94912  |

Tatiomicin (**3**) Conformer 5

|   |          |          |          |
|---|----------|----------|----------|
| C | -4.54970 | 0.42332  | 0.08559  |
| C | -4.35237 | -0.92460 | -0.20927 |
| C | -3.06457 | -1.44192 | -0.31190 |
| C | -1.96105 | -0.60129 | -0.13924 |
| C | -2.15141 | 0.74770  | 0.17963  |
| C | -3.46345 | 1.26687  | 0.29074  |
| C | -0.58279 | -1.20398 | -0.24709 |
| C | 0.57674  | -0.19321 | -0.31595 |
| C | 0.26455  | 1.18353  | 0.18952  |
| C | -1.00414 | 1.59620  | 0.38458  |
| C | 1.92829  | -0.72675 | 0.27010  |
| C | 2.87321  | 0.19957  | -0.54735 |
| C | 2.79328  | 1.65672  | -0.02217 |
| C | 1.38523  | 2.13395  | 0.34681  |
| O | -3.56499 | 2.58148  | 0.59086  |
| O | -2.77358 | -2.75494 | -0.54565 |
| C | -4.86086 | 3.15109  | 0.71535  |
| C | -3.84538 | -3.64937 | -0.82037 |
| O | -0.34700 | -2.09810 | 0.84990  |
| O | 1.22560  | 3.27025  | 0.75854  |
| C | 2.05434  | -0.58755 | 1.76583  |
| C | 2.91959  | -1.21139 | 2.57332  |
| C | 3.98120  | -2.21507 | 2.25131  |
| O | 2.16396  | -2.03683 | -0.19716 |
| O | 4.19657  | -0.23522 | -0.63921 |



|   |          |          |          |
|---|----------|----------|----------|
| C | 3.48454  | 2.66971  | -0.93883 |
| O | 0.88894  | -0.05274 | -1.74827 |
| C | 2.21811  | 0.10113  | -1.92362 |
| O | 2.72454  | 0.16906  | -3.00625 |
| H | -5.56300 | 0.79643  | 0.15699  |
| H | -5.21821 | -1.55932 | -0.34975 |
| H | -0.53021 | -1.77311 | -1.18127 |
| H | -1.17002 | 2.62295  | 0.69098  |
| H | 3.32962  | 1.64235  | 0.93802  |
| H | -4.70111 | 4.20007  | 0.95866  |
| H | -5.41701 | 3.07674  | -0.22461 |
| H | -5.42760 | 2.67306  | 1.52083  |
| H | -3.38453 | -4.61679 | -1.01246 |
| H | -4.52097 | -3.73236 | 0.03678  |
| H | -4.40415 | -3.33067 | -1.70558 |
| H | -1.03323 | -2.77588 | 0.79224  |
| H | 1.36144  | 0.10794  | 2.23219  |
| H | 2.83706  | -0.96210 | 3.63086  |
| H | 4.06016  | -2.42479 | 1.18638  |
| H | 4.95108  | -1.86607 | 2.62439  |
| H | 3.77746  | -3.15613 | 2.77602  |
| H | 1.49057  | -2.58133 | 0.23885  |
| H | 4.61833  | -0.10803 | 0.21786  |
| H | 3.50869  | 3.64414  | -0.45022 |
| H | 4.50705  | 2.35462  | -1.15167 |
| H | 2.95610  | 2.77665  | -1.88947 |

Tatiomicin (**3**) Conformer 6

|   |          |          |          |
|---|----------|----------|----------|
| C | -4.28479 | 0.73389  | -0.34247 |
| C | -4.21858 | -0.65752 | -0.39273 |
| C | -2.98917 | -1.30528 | -0.33874 |
| C | -1.80953 | -0.56016 | -0.23805 |
| C | -1.86922 | 0.83744  | -0.17540 |
| C | -3.12428 | 1.49079  | -0.23025 |
| C | -0.49683 | -1.30811 | -0.21224 |
| C | 0.77000  | -0.42715 | -0.25525 |
| C | 0.57260  | 1.04220  | -0.02772 |
| C | -0.65285 | 1.60088  | -0.04097 |
| C | 1.98783  | -0.94272 | 0.56208  |
| C | 3.10935  | -0.27037 | -0.27814 |
| C | 3.15808  | 1.24398  | -0.00550 |
| C | 1.77677  | 1.89684  | 0.09971  |
| O | -3.09914 | 2.84145  | -0.17036 |
| O | -2.82976 | -2.66252 | -0.36235 |
| C | -4.33260 | 3.54565  | -0.21628 |
| C | -3.98236 | -3.48086 | -0.52990 |
| O | -0.42209 | -2.18701 | 0.91696  |
| O | 1.69548  | 3.09852  | 0.28654  |

|   |          |          |          |
|---|----------|----------|----------|
| C | 2.16703  | -0.63733 | 2.02624  |
| C | 1.38079  | -0.21249 | 3.02080  |
| C | -0.06372 | 0.15444  | 3.07713  |
| O | 2.19195  | -2.33419 | 0.33631  |
| O | 4.37920  | -0.79795 | -0.04574 |
| C | 4.06129  | 2.01289  | -0.97298 |
| O | 1.24573  | -0.55676 | -1.65331 |
| C | 2.59025  | -0.54583 | -1.69212 |
| O | 3.21306  | -0.72360 | -2.70138 |
| H | -5.25532 | 1.21026  | -0.38932 |
| H | -5.13965 | -1.22080 | -0.47416 |
| H | -0.44907 | -1.91494 | -1.12353 |
| H | -0.72884 | 2.67720  | 0.06309  |
| H | 3.58501  | 1.33241  | 1.00190  |
| H | -4.85934 | 3.35889  | -1.15757 |
| H | -4.97426 | 3.27454  | 0.62830  |
| H | -4.07371 | 4.60093  | -0.15018 |
| H | -4.67818 | -3.35735 | 0.30563  |
| H | -4.48761 | -3.25495 | -1.47356 |
| H | -3.61894 | -4.50679 | -0.55039 |
| H | -1.17145 | -2.79258 | 0.82757  |
| H | 3.20097  | -0.84597 | 2.29994  |
| H | 1.89227  | -0.11174 | 3.97834  |
| H | -0.52063 | -0.31238 | 3.95638  |
| H | -0.17413 | 1.23768  | 3.20731  |
| H | -0.63234 | -0.15297 | 2.20533  |
| H | 1.41442  | -2.77591 | 0.71369  |
| H | 4.31182  | -1.75889 | -0.11854 |
| H | 4.12785  | 3.05438  | -0.65670 |
| H | 5.06234  | 1.57967  | -0.97598 |
| H | 3.67295  | 1.98874  | -1.99438 |

Tatiomicin (**3**) C-2 epimer conformation 1

|   |          |          |          |
|---|----------|----------|----------|
| C | 4.56123  | 0.44320  | -0.18749 |
| C | 4.37620  | -0.92766 | 0.00215  |
| C | 3.09363  | -1.45190 | 0.14567  |
| C | 1.98154  | -0.60058 | 0.11438  |
| C | 2.15850  | 0.77438  | -0.09270 |
| C | 3.46658  | 1.30139  | -0.24322 |
| C | 0.60639  | -1.21118 | 0.28215  |
| C | -0.55962 | -0.20650 | 0.44230  |
| C | -0.25738 | 1.22116  | 0.07125  |
| C | 1.00494  | 1.64427  | -0.14423 |
| C | -1.92350 | -0.65938 | -0.19192 |
| C | -2.86526 | 0.19368  | 0.71422  |
| C | -2.79622 | 1.71629  | 0.40643  |

|   |          |          |          |
|---|----------|----------|----------|
| C | -1.38119 | 2.19563  | 0.03618  |
| O | 3.55662  | 2.64406  | -0.43016 |
| O | 2.81332  | -2.78735 | 0.29558  |
| C | 4.84947  | 3.23354  | -0.58076 |
| C | 3.89862  | -3.71082 | 0.42516  |
| O | 0.30982  | -2.09425 | -0.81977 |
| O | -1.20580 | 3.36729  | -0.25804 |
| C | -2.00114 | -0.42483 | -1.68282 |
| C | -2.83744 | -0.97425 | -2.56999 |
| C | -3.95594 | -1.95411 | -2.37610 |
| O | -2.22066 | -2.00127 | 0.18505  |
| O | -4.20227 | -0.21821 | 0.70661  |
| O | -0.86685 | -0.20295 | 1.89573  |
| C | -2.19276 | -0.03553 | 2.08411  |
| O | -2.70450 | -0.05120 | 3.17020  |
| C | -3.82873 | 2.19549  | -0.63043 |
| H | 5.56818  | 0.82127  | -0.29423 |
| H | 5.24498  | -1.57085 | 0.03036  |
| H | 0.60962  | -1.80140 | 1.20291  |
| H | 1.16585  | 2.69360  | -0.35663 |
| H | -3.02881 | 2.23699  | 1.34398  |
| H | 4.67271  | 4.29881  | -0.71206 |
| H | 5.46129  | 3.07122  | 0.31123  |
| H | 5.36286  | 2.83646  | -1.46115 |
| H | 3.44005  | -4.68672 | 0.56931  |
| H | 4.51260  | -3.72547 | -0.47964 |
| H | 4.51692  | -3.46540 | 1.29273  |
| H | 1.00227  | -2.77044 | -0.81246 |
| H | -1.27062 | 0.27638  | -2.07320 |
| H | -2.69508 | -0.65756 | -3.60195 |
| H | -3.80596 | -2.82849 | -3.01949 |
| H | -4.05505 | -2.29164 | -1.34817 |
| H | -4.90285 | -1.50008 | -2.68943 |
| H | -1.56272 | -2.55653 | -0.26299 |
| H | -4.21919 | -1.16756 | 0.88743  |
| H | -3.72428 | 3.27376  | -0.75234 |
| H | -4.83695 | 1.97439  | -0.28363 |
| H | -3.68088 | 1.71637  | -1.59804 |

Tatiomicin\* (3) C-2 epimer conformation 2

|   |          |          |          |
|---|----------|----------|----------|
| C | 4.56019  | 0.43112  | -0.14618 |
| C | 4.37434  | -0.93590 | 0.06132  |
| C | 3.09023  | -1.48068 | 0.13414  |
| C | 1.97669  | -0.63773 | -0.00134 |
| C | 2.15643  | 0.74461  | -0.18524 |
| C | 3.46522  | 1.28201  | -0.26867 |
| C | 0.58912  | -1.23624 | -0.00892 |
| C | -0.54104 | -0.23853 | 0.33503  |

|   |          |          |          |
|---|----------|----------|----------|
| C | -0.25341 | 1.20343  | 0.02391  |
| C | 1.00587  | 1.62354  | -0.21874 |
| C | -1.95046 | -0.64536 | -0.22126 |
| C | -2.80948 | 0.13922  | 0.81762  |
| C | -2.74688 | 1.68230  | 0.60191  |
| C | -1.37468 | 2.17611  | 0.10062  |
| O | 3.55694  | 2.62595  | -0.45342 |
| O | 2.83169  | -2.80304 | 0.33380  |
| C | 4.85191  | 3.22704  | -0.50662 |
| C | 3.92833  | -3.69829 | 0.51788  |
| O | 0.32511  | -1.90660 | -1.25473 |
| O | -1.22925 | 3.35285  | -0.18870 |
| C | -2.16267 | -0.29464 | -1.67591 |
| C | -3.06170 | -0.79282 | -2.53258 |
| C | -4.13982 | -1.81516 | -2.33017 |
| O | -2.21256 | -2.01529 | 0.06972  |
| O | -4.14687 | -0.26360 | 0.88888  |
| O | -0.72491 | -0.33711 | 1.80245  |
| C | -2.03026 | -0.18568 | 2.10995  |
| O | -2.45383 | -0.28093 | 3.22925  |
| C | -3.88754 | 2.23742  | -0.26916 |
| H | 5.56932  | 0.81493  | -0.20060 |
| H | 5.24678  | -1.56652 | 0.16257  |
| H | 0.53713  | -2.02715 | 0.73791  |
| H | 1.17496  | 2.67828  | -0.39545 |
| H | -2.85648 | 2.14259  | 1.59231  |
| H | 4.67583  | 4.29166  | -0.64451 |
| H | 5.39937  | 3.06454  | 0.42627  |
| H | 5.43174  | 2.84062  | -1.34981 |
| H | 3.48393  | -4.67934 | 0.67223  |
| H | 4.56968  | -3.72533 | -0.36821 |
| H | 4.52064  | -3.42451 | 1.39621  |
| H | 0.57469  | -1.33341 | -1.98948 |
| H | -1.49349 | 0.46624  | -2.06561 |
| H | -3.01745 | -0.38623 | -3.54160 |
| H | -4.16474 | -2.21997 | -1.32220 |
| H | -5.11494 | -1.36751 | -2.55188 |
| H | -4.01262 | -2.64211 | -3.03798 |
| H | -1.68034 | -2.54156 | -0.54395 |
| H | -4.16127 | -1.22233 | 1.01024  |
| H | -3.77588 | 3.31938  | -0.34077 |
| H | -4.85062 | 2.00973  | 0.18486  |
| H | -3.86903 | 1.81546  | -1.27397 |

Tatiomicin\* (3) C-2 epimer conformation 3

|   |         |          |          |
|---|---------|----------|----------|
| C | 4.56887 | 0.42424  | -0.08421 |
| C | 4.37547 | -0.94760 | 0.08135  |
| C | 3.08932 | -1.49272 | 0.09922  |

|   |          |          |          |
|---|----------|----------|----------|
| C | 1.98232  | -0.64566 | -0.04361 |
| C | 2.16813  | 0.73845  | -0.19581 |
| C | 3.47833  | 1.27799  | -0.22267 |
| C | 0.59532  | -1.23944 | -0.11861 |
| C | -0.52281 | -0.24745 | 0.27131  |
| C | -0.24632 | 1.19363  | -0.05097 |
| C | 1.01844  | 1.61476  | -0.26599 |
| C | -1.94771 | -0.65701 | -0.22541 |
| C | -2.75785 | 0.13160  | 0.84054  |
| C | -2.71428 | 1.67576  | 0.59689  |
| C | -1.36899 | 2.16074  | 0.01333  |
| O | 3.57531  | 2.62649  | -0.37228 |
| O | 2.82552  | -2.82220 | 0.24923  |
| C | 4.87210  | 3.22428  | -0.39935 |
| C | 3.91804  | -3.72381 | 0.42015  |
| O | 0.41887  | -1.71022 | -1.45886 |
| O | -1.24694 | 3.32549  | -0.33046 |
| C | -2.19686 | -0.32318 | -1.68460 |
| C | -3.18551 | -0.76421 | -2.46827 |
| C | -4.35276 | -1.65014 | -2.14329 |
| O | -2.07837 | -2.05621 | 0.04197  |
| O | -4.06728 | -0.37073 | 0.98284  |
| O | -0.64958 | -0.34408 | 1.75531  |
| C | -1.93376 | -0.18998 | 2.09259  |
| O | -2.36270 | -0.29073 | 3.21390  |
| C | -3.90705 | 2.20765  | -0.21332 |
| H | 5.57938  | 0.80799  | -0.09691 |
| H | 5.24446  | -1.58170 | 0.19092  |
| H | 0.52488  | -2.07625 | 0.57829  |
| H | 1.18965  | 2.66919  | -0.44287 |
| H | -2.76295 | 2.15383  | 1.58469  |
| H | 4.70111  | 4.29121  | -0.52585 |
| H | 5.40650  | 3.04854  | 0.53886  |
| H | 5.46282  | 2.84705  | -1.23919 |
| H | 3.47165  | -4.71027 | 0.52836  |
| H | 4.57687  | -3.71723 | -0.45348 |
| H | 4.49358  | -3.48474 | 1.31971  |
| H | -0.32832 | -2.32378 | -1.45475 |
| H | -1.45196 | 0.31633  | -2.14441 |
| H | -3.14226 | -0.43952 | -3.50587 |
| H | -4.19656 | -2.65691 | -2.54777 |
| H | -4.55788 | -1.72803 | -1.07662 |
| H | -5.25591 | -1.25968 | -2.62185 |
| H | -3.01116 | -2.24222 | 0.21186  |
| H | -4.26226 | -0.42185 | 1.93095  |
| H | -3.80855 | 3.28840  | -0.31547 |
| H | -4.84136 | 1.98565  | 0.30098  |
| H | -3.94495 | 1.76425  | -1.20831 |

## Tatiomicin\* (3) C-2 epimer conformation 4

|   |          |          |          |
|---|----------|----------|----------|
| C | 4.56905  | 0.41177  | -0.02383 |
| C | 4.37016  | -0.96263 | 0.12003  |
| C | 3.08216  | -1.49967 | 0.10119  |
| C | 1.97985  | -0.64793 | -0.03406 |
| C | 2.17200  | 0.73299  | -0.19667 |
| C | 3.48384  | 1.26839  | -0.19130 |
| C | 0.59066  | -1.24234 | -0.14221 |
| C | -0.52197 | -0.25225 | 0.22807  |
| C | -0.24876 | 1.17299  | -0.17677 |
| C | 1.02172  | 1.59807  | -0.34823 |
| C | -1.97042 | -0.68939 | -0.17106 |
| C | -2.72074 | 0.20239  | 0.86438  |
| C | -2.68802 | 1.71971  | 0.49635  |
| C | -1.37183 | 2.14091  | -0.18730 |
| O | 3.58716  | 2.61550  | -0.34349 |
| O | 2.80091  | -2.83723 | 0.17472  |
| C | 4.88601  | 3.20982  | -0.35878 |
| C | 3.87707  | -3.75380 | 0.37938  |
| O | 0.36252  | -1.67628 | -1.49028 |
| O | -1.26262 | 3.26136  | -0.65858 |
| C | -2.28037 | -0.46516 | -1.63845 |
| C | -3.31362 | -0.93798 | -2.34021 |
| C | -4.47846 | -1.77583 | -1.89916 |
| O | -2.13094 | -2.04751 | 0.22873  |
| O | -4.02493 | -0.27617 | 1.11218  |
| O | -0.57885 | -0.26108 | 1.71891  |
| C | -1.84091 | -0.03724 | 2.09952  |
| O | -2.21597 | -0.03410 | 3.24464  |
| C | -3.91825 | 2.19555  | -0.29144 |
| H | 5.58007  | 0.79395  | -0.00713 |
| H | 5.23472  | -1.60158 | 0.23785  |
| H | 0.49334  | -2.08838 | 0.53892  |
| H | 1.19356  | 2.64598  | -0.55986 |
| H | -2.68210 | 2.27645  | 1.44378  |
| H | 4.71947  | 4.27585  | -0.49802 |
| H | 5.40700  | 3.04219  | 0.58833  |
| H | 5.48681  | 2.82260  | -1.18682 |
| H | 4.40243  | -3.54121 | 1.31500  |
| H | 3.41914  | -4.73913 | 0.43654  |
| H | 4.58280  | -3.72771 | -0.45628 |
| H | 0.90994  | -2.45761 | -1.63197 |
| H | -1.54353 | 0.11634  | -2.18120 |
| H | -3.31349 | -0.69221 | -3.40037 |
| H | -4.62593 | -1.78518 | -0.82076 |
| H | -5.39941 | -1.39880 | -2.35463 |
| H | -4.35896 | -2.80916 | -2.24508 |

|   |          |          |          |
|---|----------|----------|----------|
| H | -3.04448 | -2.15262 | 0.52694  |
| H | -4.18086 | -0.22839 | 2.06765  |
| H | -3.81315 | 3.26101  | -0.49658 |
| H | -4.82501 | 2.03660  | 0.29094  |
| H | -4.01568 | 1.66487  | -1.23841 |

Tatiomicin\* (3) C-2 epimer conformation 5

|   |          |          |          |
|---|----------|----------|----------|
| C | 4.57308  | 0.43055  | -0.14859 |
| C | 4.37961  | -0.93988 | 0.03601  |
| C | 3.09195  | -1.46155 | 0.14350  |
| C | 1.98465  | -0.60595 | 0.08780  |
| C | 2.17004  | 0.76808  | -0.11817 |
| C | 3.48254  | 1.29180  | -0.23541 |
| C | 0.60313  | -1.21230 | 0.20180  |
| C | -0.55205 | -0.20347 | 0.39582  |
| C | -0.24667 | 1.21685  | 0.00582  |
| C | 1.01840  | 1.63756  | -0.20194 |
| C | -1.93877 | -0.67044 | -0.18562 |
| C | -2.84567 | 0.18843  | 0.75490  |
| C | -2.75669 | 1.72307  | 0.43622  |
| C | -1.36751 | 2.18679  | -0.03917 |
| O | 3.58067  | 2.63396  | -0.42251 |
| O | 2.80213  | -2.79607 | 0.27281  |
| C | 4.87821  | 3.21923  | -0.54702 |
| C | 3.87919  | -3.72348 | 0.43589  |
| O | 0.31754  | -2.02231 | -0.95821 |
| O | -1.21235 | 3.34074  | -0.40660 |
| C | -2.10201 | -0.42220 | -1.66943 |
| C | -2.98121 | -0.99074 | -2.50253 |
| C | -4.05195 | -2.00702 | -2.22941 |
| O | -2.17582 | -2.02105 | 0.18084  |
| O | -4.16747 | -0.25839 | 0.87998  |
| O | -0.81284 | -0.19393 | 1.85683  |
| C | -2.13423 | -0.03927 | 2.09552  |
| O | -2.60073 | -0.04189 | 3.20015  |
| C | -3.85750 | 2.23299  | -0.51114 |
| H | 5.58361  | 0.80589  | -0.22794 |
| H | 5.24574  | -1.58530 | 0.08700  |
| H | 0.58284  | -1.85536 | 1.08541  |
| H | 1.18277  | 2.68415  | -0.42522 |
| H | -2.90357 | 2.24462  | 1.39076  |
| H | 4.70744  | 4.28444  | -0.68661 |
| H | 5.46991  | 3.05913  | 0.35883  |
| H | 5.40969  | 2.81710  | -1.41431 |
| H | 3.41283  | -4.69834 | 0.56097  |
| H | 4.52377  | -3.73732 | -0.44751 |
| H | 4.46876  | -3.48344 | 1.32483  |
| H | 0.99967  | -2.70793 | -0.98162 |

|   |          |          |          |
|---|----------|----------|----------|
| H | -1.41517 | 0.29978  | -2.09942 |
| H | -2.91673 | -0.67268 | -3.54168 |
| H | -3.86934 | -2.91308 | -2.81873 |
| H | -4.11566 | -2.28617 | -1.18023 |
| H | -5.02330 | -1.62148 | -2.55978 |
| H | -1.52785 | -2.53978 | -0.32130 |
| H | -4.64274 | -0.06917 | 0.06296  |
| H | -3.70007 | 3.29685  | -0.68697 |
| H | -4.84360 | 2.11322  | -0.05968 |
| H | -3.83726 | 1.72200  | -1.47527 |

Tatiomicin\* (3) C-2 epimer conformation 6

|   |          |          |          |
|---|----------|----------|----------|
| C | 4.61238  | 0.34610  | 0.03780  |
| C | 4.38540  | -0.99469 | 0.33203  |
| C | 3.08930  | -1.51048 | 0.37970  |
| C | 2.00030  | -0.66993 | 0.15066  |
| C | 2.21145  | 0.69415  | -0.12868 |
| C | 3.53268  | 1.20048  | -0.19532 |
| C | 0.60475  | -1.25041 | 0.12897  |
| C | -0.51158 | -0.20478 | 0.35848  |
| C | -0.19750 | 1.19437  | -0.09085 |
| C | 1.07988  | 1.57635  | -0.30584 |
| C | -1.91960 | -0.64111 | -0.16384 |
| C | -2.76505 | 0.25569  | 0.78201  |
| C | -2.68367 | 1.76880  | 0.39560  |
| C | -1.30523 | 2.17775  | -0.16737 |
| O | 3.65791  | 2.52227  | -0.47548 |
| O | 2.86842  | -2.82737 | 0.71441  |
| C | 4.96589  | 3.09429  | -0.55320 |
| C | 3.25354  | -3.79286 | -0.27726 |
| O | 0.45498  | -1.90692 | -1.13389 |
| O | -1.14778 | 3.30264  | -0.61431 |
| C | -2.09268 | -0.44729 | -1.65930 |
| C | -3.05911 | -0.93774 | -2.44124 |
| C | -4.26745 | -1.75351 | -2.08491 |
| O | -2.08778 | -2.00711 | 0.22845  |
| O | -4.08716 | -0.21625 | 0.90906  |
| O | -0.70885 | -0.15156 | 1.83719  |
| C | -2.00506 | 0.04737  | 2.09711  |
| O | -2.48675 | 0.06036  | 3.20109  |
| C | -3.82846 | 2.23946  | -0.51557 |
| H | 5.62803  | 0.71486  | 0.00827  |
| H | 5.22525  | -1.64885 | 0.53520  |
| H | 0.51252  | -1.98087 | 0.93479  |
| H | 1.27146  | 2.60652  | -0.57889 |
| H | -2.76802 | 2.33954  | 1.33042  |
| H | 4.81190  | 4.14490  | -0.78930 |
| H | 5.49021  | 3.00696  | 0.40243  |



|   |          |          |          |
|---|----------|----------|----------|
| H | 5.55441  | 2.62358  | -1.34570 |
| H | 2.67892  | -3.64065 | -1.19475 |
| H | 4.32421  | -3.73344 | -0.49411 |
| H | 3.02545  | -4.77046 | 0.14535  |
| H | -0.32455 | -2.47646 | -1.07049 |
| H | -1.30759 | 0.12097  | -2.14527 |
| H | -2.95949 | -0.72125 | -3.50291 |
| H | -4.51709 | -1.72418 | -1.02536 |
| H | -5.13739 | -1.38315 | -2.63565 |
| H | -4.12941 | -2.79797 | -2.38772 |
| H | -3.03080 | -2.16552 | 0.36725  |
| H | -4.32940 | -0.16661 | 1.84636  |
| H | -3.70466 | 3.30446  | -0.71215 |
| H | -4.78917 | 2.08030  | -0.02730 |
| H | -3.82982 | 1.70691  | -1.46661 |

Tatiomicin\* (3) C-2 epimer conformation 7

|   |          |          |          |
|---|----------|----------|----------|
| C | -4.32071 | 0.70317  | -0.26829 |
| C | -4.25169 | -0.68964 | -0.19867 |
| C | -3.01684 | -1.33129 | -0.14638 |
| C | -1.83410 | -0.58005 | -0.16881 |
| C | -1.89580 | 0.82030  | -0.22697 |
| C | -3.15727 | 1.46713  | -0.27915 |
| C | -0.51312 | -1.32285 | -0.14087 |
| C | 0.74886  | -0.44432 | -0.32797 |
| C | 0.55508  | 1.04307  | -0.21904 |
| C | -0.67456 | 1.59526  | -0.21739 |
| C | 2.02447  | -0.88454 | 0.45677  |
| C | 3.09256  | -0.28368 | -0.51108 |
| C | 3.14141  | 1.27299  | -0.46267 |
| C | 1.76263  | 1.91156  | -0.20961 |
| O | -3.13432 | 2.82416  | -0.34099 |
| O | -2.85463 | -2.69179 | -0.05398 |
| C | -4.37350 | 3.53393  | -0.38611 |
| C | -4.01351 | -3.53020 | -0.10284 |
| O | -0.37395 | -2.09777 | 1.06652  |
| O | 1.68143  | 3.11842  | -0.04685 |
| C | 2.27913  | -0.48013 | 1.89031  |
| C | 1.55174  | 0.02595  | 2.89293  |
| C | 0.11634  | 0.43786  | 3.00096  |
| O | 2.22567  | -2.29887 | 0.32986  |
| O | 4.37936  | -0.80097 | -0.32411 |
| O | 1.14496  | -0.69982 | -1.74681 |
| C | 2.48684  | -0.68530 | -1.86699 |
| O | 3.05480  | -0.92893 | -2.89696 |
| C | 4.20667  | 1.84644  | 0.48762  |
| H | -5.29324 | 1.17283  | -0.31082 |
| H | -5.17257 | -1.25646 | -0.18571 |

|   |          |          |          |
|---|----------|----------|----------|
| H | -0.50609 | -2.01362 | -0.98871 |
| H | -0.75463 | 2.67461  | -0.19802 |
| H | 3.41330  | 1.60967  | -1.47169 |
| H | -4.10648 | 4.58767  | -0.42693 |
| H | -4.94723 | 3.26754  | -1.27846 |
| H | -4.96985 | 3.34210  | 0.51060  |
| H | -3.64177 | -4.55114 | -0.04963 |
| H | -4.67406 | -3.33599 | 0.74654  |
| H | -4.55739 | -3.38684 | -1.04009 |
| H | -1.11984 | -2.71545 | 1.07269  |
| H | 3.31780  | -0.69656 | 2.12926  |
| H | 2.11369  | 0.17840  | 3.81336  |
| H | -0.28589 | 0.09367  | 3.95909  |
| H | 0.03444  | 1.53120  | 3.00178  |
| H | -0.51643 | 0.04122  | 2.21501  |
| H | 1.48435  | -2.71703 | 0.79700  |
| H | 4.30617  | -1.76541 | -0.30430 |
| H | 4.19409  | 2.93344  | 0.40775  |
| H | 5.19405  | 1.48217  | 0.20838  |
| H | 4.01344  | 1.57431  | 1.52509  |

## Genome sequencing and analysis of biosynthetic pathway

### Bioinformatic analysis

Artemis (Rutherford, Parkhill et al. 2000) was used for visual inspection and comparative genomics. The web based software RAST<sup>10</sup> was used for annotation of the sequence, while genome mining was performed using the automated software antiSMASH 6.0.1.<sup>11</sup> The ends of the tatiomicin gene cluster identified due to its homology to the rishirilide gene cluster were manually defined.<sup>12</sup>

**Table S9** Size of contigs from the assembly of the PacBio dataset.

|         | Size in Kb |          | Size in Kb |
|---------|------------|----------|------------|
| Contig1 | 42         | Contig8  | 302        |
| Contig2 | 16         | Contig9  | 543        |
| Contig3 | 328        | Contig10 | 134        |
| Contig4 | 995        | Contig11 | 123        |
| Contig5 | 4418       | Contig12 | 615        |
| Contig6 | 1767       | Contig13 | 377        |
| Contig7 | 12         | Total    | 9672       |

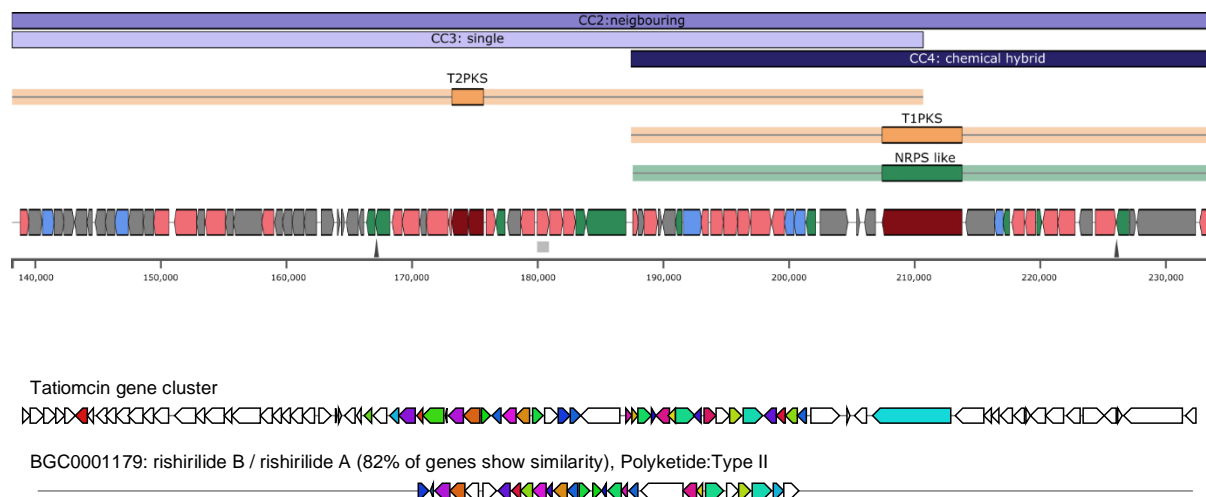

**Figure S32** antiSMASH analysis of the contig containing the tatiomicin gene cluster. **(Top)** Region 2 depicting a putative T1PKS & T2PKS biosynthetic gene cluster. Genes colours: red – core biosynthetic genes, pink – additional biosynthetic genes, blue – transport related genes, green – regulatory genes, grey – other genes **(Bottom)** comparison to rishirilide gene cluster as depicted by antiSMASH

**Table S10.** Deduced function of ORFs in the tatiomicin gene cluster from *Amycolatopsis* DEM30355

| ORF    | AA  | Most similar Protein                                                             | E value | ident  | accession      |
|--------|-----|----------------------------------------------------------------------------------|---------|--------|----------------|
| tatO10 | 261 | 3-oxoacyl-ACP reductase FabG [ <i>Micromonospora</i> sp. KC213]                  | 2E-145  | 79.69% | WP_132336555.1 |
| tatK1  | 76  | act minimal PKS acyl carrier protein [ <i>Streptomyces</i> sp. SolWspMP-5a-2]    | 8E-19   | 57.00% | SCD95577.1     |
| tatK2  | 423 | ketosynthase chain-length factor [ <i>Amycolatopsis balhimycina</i> ]            | 0       | 73.00% | WP_020639073.1 |
| tatK3  | 418 | beta-ACP synthase [ <i>Streptacidiphilus jiangxiensis</i> ]                      | 0       | 80.00% | WP_042441868.1 |
| tatO3  | 245 | 3-oxoacyl-ACP reductase [ <i>Actinosynnema</i> sp. ALI-1.44]                     | 2E-119  | 73.00% | WP_076992001.1 |
| tatR2  | 242 | SARP family pathway specific regulatory protein [ <i>Streptomyces collinus</i> ] | 1E-72   | 51.00% | WP_020939953.1 |
| tatO1  | 351 | luciferase [ <i>Actinosynnema</i> sp. ALI-1.44]                                  | 0       | 77.00% | WP_076991986.1 |
| tatP   | 372 | putative phosphotransferase [ <i>Streptomyces bottropensis</i> ]                 | 4E-112  | 53.00% | AHL46718.1     |
| TatC1  | 312 | MBL fold metallo-hydrolase [ <i>Actinosynnema</i> sp. ALI-1.44]                  | 7E-132  | 61.00% | WP_076992077.1 |
| tatM1  | 349 | methyltransferase [ <i>Acidobacteriales</i> bacterium 13_1_40CM_3_55_5]          | 3E-112  | 50.00% | OLD18459.1     |

|       |      |                                                                                        |        |        |                |
|-------|------|----------------------------------------------------------------------------------------|--------|--------|----------------|
| TatC2 | 320  | cyclase [Actinobacteria bacterium 13_2_20CM_2_71_6]                                    | 5E-124 | 56.00% | OLB79503.1     |
| tatR1 | 269  | DNA-binding transcriptional activator of the SARP family [Streptomyces sp. MnatMP-M17] | 1E-67  | 48.00% | SCF79391.1     |
| tatR3 | 1052 | SARP family transcriptional regulator [Streptomyces scabiei]                           | 0      | 42.00% | WP_037700027.1 |
| tatC3 | 144  | hydroxylacyl-CoA dehydrogenase [Actinosynnema sp. ALI-1.44]                            | 3E-69  | 75.00% | WP_076991988.1 |
| tatC4 | 160  | hydroxylacyl-CoA dehydrogenase [Streptomyces acidiscabies]                             | 4E-28  | 42.00% | WP_050987403.1 |
| tatO5 | 357  | alkene reductase [Actinosynnema sp. ALI-1.44]                                          | 4E-146 | 64.00% | WP_076992078.1 |
| tatO4 | 100  | antibiotic biosynthesis monooxygenase [Actinosynnema sp. ALI-1.44]                     | 6E-42  | 67.00% | WP_076991989.1 |
| tatO6 | 340  | luciferase family oxidoreductase [Streptomyces scabiei]                                | 3E-112 | 58.00% | WP_037700025.1 |
| tatR4 | 170  | MarR family transcriptional regulator [Amycolatopsis sp. MJM2582]                      | 1E-49  | 58.00% | WP_037347867.1 |
| tatT4 | 495  | MFS transporter [Actinosynnema sp. ALI-1.44]                                           | 0      | 71.00% | WP_076992079.1 |
| tatO2 | 205  | flavin reductase family protein [Kitasatospora mediocidica]                            | 2E-61  | 57.93% | WP_035798953.1 |

|        |      |                                                                                                                  |        |        |                |
|--------|------|------------------------------------------------------------------------------------------------------------------|--------|--------|----------------|
| tatM2  | 338  | O-methyltransferase<br>[ <i>Nonomuraea jiangxiensis</i> ]                                                        | 2E-108 | 53.00% | SDI34086.1     |
| tatC5  | 375  | two-component flavin-dependent<br>monooxygenase<br>[ <i>Micromonospora marina</i> ]                              | 3E-116 | 52.00% | SCF37294.1     |
| tatO8  | 325  | oxidoreductase<br>[ <i>Amycolatopsis sp.</i><br>MJM2582]                                                         | 3E-138 | 63.00% | WP_037347708.1 |
| tatO9  | 548  | Putative polyketide<br>hydroxylase [ <i>Streptomyces<br/>bottropensis</i> ATCC 25435]                            | 0      | 56.00% | EMF53299.1     |
| tatT1  | 331  | amino acid ABC transporter<br>substrate-binding protein,<br>PAAT family [ <i>Actinoplanes<br/>derwentensis</i> ] | 3E-97  | 52.00% | SDT78871.1     |
| tatT2  | 255  | ABC transporter related<br>protein [ <i>Streptomyces<br/>thermoautotrophicus</i> ]                               | 6E-127 | 73.00% | KWX02137.1     |
| tatT3  | 299  | ABC transporter permease<br>[ <i>Streptomyces<br/>thermoautotrophicus</i> ]                                      | 2E-118 | 67.00% | WP_066891941.1 |
| tatR5  | 255  | SARP family transcriptional<br>regulator [ <i>Streptomyces sp.</i><br>PTY08712]                                  | 5E-62  | 50.00% | WP_065488167.1 |
| tatS1  | 2120 | type I polyketide synthase<br>[ <i>Amycolatopsis vastitatis</i> ]                                                | 0.0    | 89.38% | WP_093947784.1 |
| TatO11 | 393  | cytochrome P450<br>[ <i>Amycolatopsis<br/>rifamycinica</i> ]                                                     | 0.0    | 94.91% | WP_051735947.1 |

**Table S11.** Homologous genes between the tatiomicin and rishirilide biosynthetic gene clusters

| tatiomicin ORFs | rishirilide ORFs | query cover | E value   | ident  |
|-----------------|------------------|-------------|-----------|--------|
| tatO10          | rsLO10           | 98%         | 1.00E-127 | 70.04% |
| tatK1           | rslK1            | 94%         | 1E-18     | 47%    |
| tatK2           | rslK2            | 93%         | 2E-162    | 63%    |
| tatK3           | rslK3            | 99%         | 0         | 68%    |
| tatO3           | rsLO3            | 99%         | 1E-72     | 49%    |
| tatR2           | rslR2            | 95%         | 4E-67     | 47%    |
| tatO1           | rsLO1            | 99%         | 8E-174    | 68%    |
| tatP            | rslP             | 97%         | 7E-117    | 53%    |
| TatC2           | rslC2            | 92%         | 4E-96     | 50%    |
| tatM1           | rsLO9            | 10%         | 0.75      | 31%    |
| TatC1           | rslC1            | 93%         | 8E-103    | 52%    |
| tatR1           | rslR1            | 93%         | 1E-61     | 47%    |
| tatR3           | rslR3            | 98%         | 0         | 41%    |
| tatC3           | rslC3            | 91%         | 2E-61     | 65%    |
| tatC4           | rslC3            | 91%         | 1E-30     | 40%    |
| tatO5           | rsLO5            | 98%         | 1E-134    | 56%    |
| tatO4           | rsLO4            | 87%         | 2E-36     | 56%    |
| tatO6           | rsLO6            | 99%         | 2E-113    | 56%    |
| tatR4           | rslR4            | 86%         | 6E-45     | 49%    |
| tatT4           | rslT4            | 92%         | 0         | 66%    |
| tatO2           | rsLO2            | 100%        | 4E-52     | 52%    |
| tatM2           | rslR4            | 18%         | 0.57      | 26%    |
| tatC5           | rslC2            | 28%         | 0.64      | 32%    |
| tatO8           | rsLO8            | 100%        | 6E-131    | 61%    |
| tatO9           | rsLO9            | 97%         | 0         | 56%    |

|        |                          |     |        |        |
|--------|--------------------------|-----|--------|--------|
| tatT1  | rsIT1                    | 82% | 2E-99  | 52%    |
| tatT2  | rsIT2                    | 96% | 4E-102 | 60%    |
| tatT3  | rsIT3                    | 88% | 3E-111 | 67%    |
| tatR5  | rsIR2                    | 91% | 5E-60  | 49%    |
| tatS1  | rsIK3                    | 14% | 1E-25  | 28.87% |
| tatO11 | No significant hit found |     |        |        |



## Proposed biosynthesis of tatiomicin

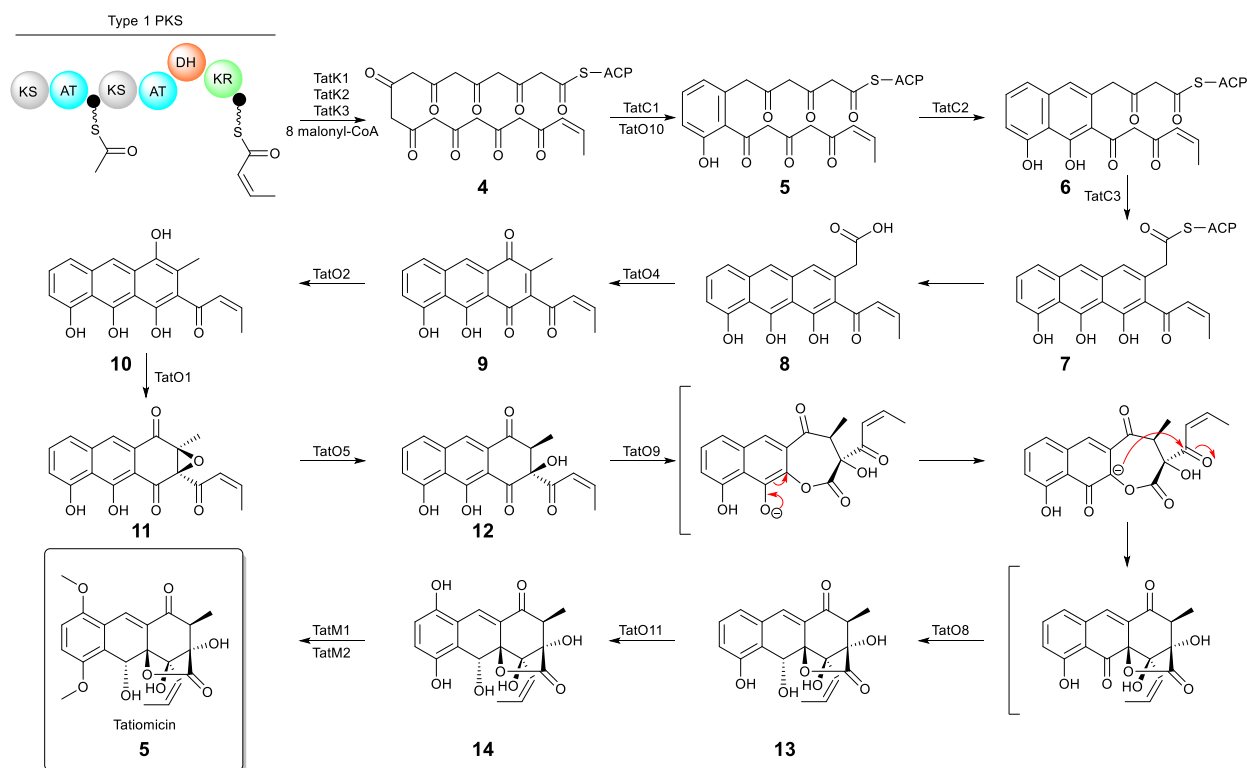

**Figure S33.** Proposed biosynthetic pathway of tatiomicin via hybrid type I and type II polyketide synthase.

The starting moiety in biosynthetic assembly of tatiomicin and rishirilide are different. In rishirilide biosynthesis, enzymes encoded by *rsIK4*, *rsIO3* and *rsIA* are proposed to be involved in production of 4-methylpentanoyl-ACP.<sup>13</sup> Tatiomicin BGC lacks the homologous of these genes, instead it contains *tatS1* that encodes a modular type I polyketide synthase enzyme with module and domain organization required for the formation of cis-crotonyl moiety. TatS1 consist of a loading module and one extender module which incorporate a malonyl-CoA onto the priming acetate unit followed by ketoreduction and dehydration to produce cis-crotonyl backbone. Cis-crotonyl moiety is then elongated via attachment of eight malonyl-CoA by minimal PKS enzymes TatK1, TatK2, and TatK3 homologous to RslK1, RslK2, RslK3, respectively.<sup>13</sup> Sequence analysis of TatC1, TatC2, and TatC3 showed homology to rishirilide cyclases RslC1, RslC2, and RslC3, respectively.<sup>13, 14</sup> It has been proposed that C9-ketoreductase RslO10 involves in first ring cyclisation of rishirilide.<sup>13</sup> The *tatO10* in *tat* gene cluster shows 70% identity to *rsIO10*, therefore, TatC1 and TatO10 together involve in first ring cyclization/aromatization of tatiomicin **5**. TatC2 and TatC3 catalyse the second and third ring cyclization to produce intermediate **7**. Several tailoring enzymes are then modifying this backbone. The function of most of the enzymes proposed here are based on their close homology to the enzymes involved in rishirilide biosynthesis. The *tatO4* with 56% identity to *rsIO4* could be responsible for quinone **9** formation. Flavin mononucleotide (FMN)-dependent monooxygenase TatO1 (68% identity to RslO1) together with putative flavin reductase TatO2 (52% identity to RslO2) are proposed to be responsible for epoxy formation in third ring.<sup>14</sup> Flavin

dependent RslO5 reductively ring-opens the epoxide moiety in rishirilide biosynthesis.<sup>15</sup> In *tat* gene cluster, *tatO5* showed homology to *rs/O5* (56% identity), suggesting that TetO5 is converting **11** to **12** which then undergoes oxidative rearrangement of carbon backbone to give intermediate **13**. The enzyme candidate for this rearrangement is TatO9. It shares a 56% identity to RslO9, that has been shown to be responsible for the carbon backbone rearrangement via lactone-forming Baeyer-Villiger oxidation followed by intramolecular aldol condensation.<sup>15</sup> The ketoreductase TatO8 (homologous of RslO8) catalyses the ketone reduction in the second ring to form **13**. Compared to rishirilide, three additional tailoring enzymes are involved in the assembly of tatiomicin. The gene *tatO11* located downstream of the *tat* gene cluster encodes for a P<sub>450</sub> enzyme that could be responsible for hydroxylation of the first ring of tatiomicin at para position of the previous hydroxyl group. Both these hydroxyls are the site for methylation by the two methyl transferases TatM1 and TatM2 to yield the final tatiomicin product.

## Heterologous expression of tatiomicin

**Table S12. Primers used for the screening of the tatiomicin gene cluster**

| Name      | Sequence                  |
|-----------|---------------------------|
| Tat_1_for | GATCGCCACCGCCGACCTCTAC    |
| Tat_1_rv  | CTCAGCACCAGGTCCTCCACTTC   |
| Tat_2_for | CACAAAGTGTTGATCGCCAACCGTG |
| Tat_2_rv  | GTCTCCTCGATCAGTTTCTGGTGCC |
| Tat_3_for | CAGCTGGTTCGCTTCGTCGTAGTGG |
| Tat_3_rv  | ACCACCACCGAATATGACGCAGCCG |
| Tat_4_for | CCGTTGCTGATCTTCGTGACCACTG |
| Tat_4_rv  | AATCGTCGAAGTAGTCGCTCTTGCC |

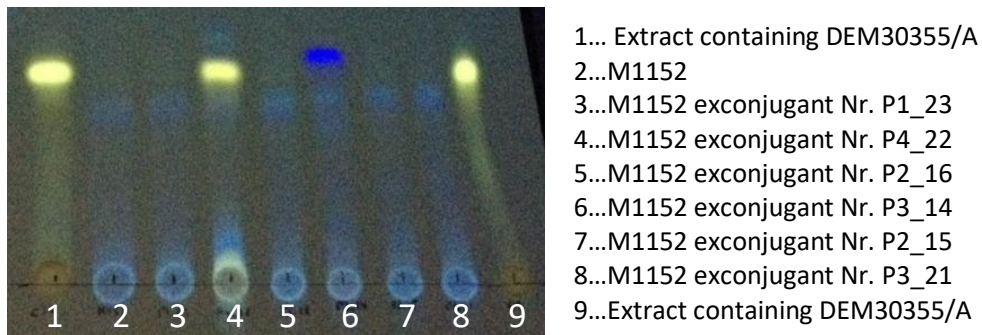

**Figure S34. Example TLC of the exconjugant screening for tatiomicin production**

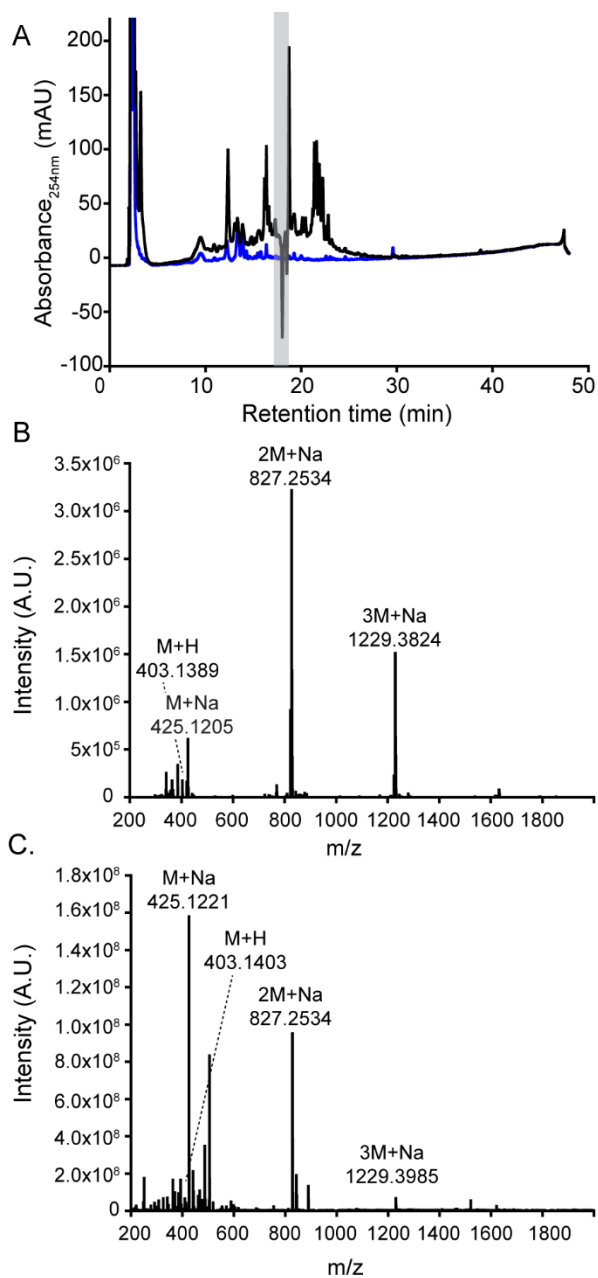

**Figure S35** Detection of tatiomicin in the heterologous host *S. coelicolor* M1152 A) extracts of *S. coelicolor* (blue) and *S. coelicolor* M1152::tat (black). In grey is the retention time of purified tatiomicin according to a purified standard. B) MS spectrum of tatiomicin purified from the native host *Amycolatopsis* DEM30355. C) MS spectrum of tatiomicin purified from the heterologous host *S. coelicolor* M1152::tat

## Bioactivity Studies

### MIC determination against a panel of bacterial isolates

**Table S13** MIC assay against a panel of pathogenic microorganisms using agar dilution method. Organism name and code are provided. The MIC was determined after 22 h of growth via visible inspection and given in mg/L.

|                               | Organism                            | Org. Code  | Tatiomicin/Tatiomicin* |
|-------------------------------|-------------------------------------|------------|------------------------|
| Gram-negative                 | <i>Acinetobacter baumannii</i>      | ATCC 19606 | >64                    |
|                               | <i>Burkholderia cepacia</i>         | ATCC 25416 | >64                    |
|                               | <i>Enterobacter cloacae</i>         | NCTC 11936 | >64                    |
|                               | <i>Escherichia coli</i>             | NCTC 10418 | >64                    |
|                               | <i>Klebsiella pneumoniae</i>        | NCTC 9528  | >64                    |
|                               | <i>Providencia rettgeri</i>         | NCTC 7475  | >64                    |
|                               | <i>Pseudomonas aeruginosa</i>       | NCTC 10662 | >64                    |
|                               | <i>Salmonella typhimurium</i>       | NCTC 74    | >64                    |
|                               | <i>Serratia marcescens</i>          | NCTC 10211 | >64                    |
|                               | <i>Yersinia enterocolitica</i>      | NCTC 11176 | >64                    |
| Gram-positive                 | <i>Bacillus subtilis</i>            | NCTC 9372  | 16                     |
|                               | <i>Enterococcus faecalis</i>        | NCTC 775   | 16                     |
|                               | <i>Enterococcus faecium</i>         | NCTC 7171  | 64                     |
|                               | <i>Listeria monocytogenes</i>       | NCTC 11994 | 16                     |
|                               | <i>Staphylococcus epidermidis</i>   | NCTC 11047 | 8                      |
|                               | <i>Staphylococcus aureus</i>        | NCTC 6571  | 8                      |
|                               | <i>Staphylococcus aureus</i> (MRSA) | NCTC 11939 | 16                     |
| <i>Streptococcus pyogenes</i> | NCTC 8306                           | 8          |                        |
| Yeast                         | <i>Candida albicans</i>             | ATCC 90028 | >64                    |
|                               | <i>Candida glabrata</i>             | NCPF 9725  | >64                    |

**Table S14** MIC assay against a panel of methicillin resistant *Staphylococcus aureus* (MRSA) using agar dilution method. Organism name and code are provided. The MIC was determined after 22 h of growth via visible inspection and given in mg/L.

|                              | MRSA Ref.            | Tatiomicin/Tatiomicin* |
|------------------------------|----------------------|------------------------|
| Bel                          | 97597                | 4                      |
| Bel                          | 97598                | 4                      |
| Fin                          | 37481                | 4                      |
| Fin                          | 54511                | 4                      |
| Fin                          | 54518                | 8                      |
| Fra                          | 462                  | 8                      |
| Fra                          | 920                  | 8                      |
| Fra                          | 95035                | 8                      |
| Ger                          | 131/98 (Sger 11d2)   | 8                      |
| Ger                          | 1966/97 (Han 111c)   | 8                      |
| Ger                          | 2594-1/97 (Sger 11a) | 8                      |
| Ger                          | 2594-2/97 (Sger 11b) | 8                      |
| EMRSA 15                     | 1729/98              | 8                      |
| EMRSA 15                     | 1758/98              | 8                      |
| EMRSA 15                     | 14956                | 8                      |
| EMRSA 15                     | 12484/98             | 8                      |
| EMRSA 15                     | 14185/98             | 8                      |
| EMRSA 15                     | 16822/98             | 8                      |
| EMRSA 15                     | 19972/98             | 8                      |
| EMRSA 15                     | 20460/98             | 8                      |
| EMRSA 15                     | 21268/98             | 8                      |
| EMRSA 15                     | 21698/98             | 8                      |
| EMRSA 15                     | 2501/98              | 8                      |
| EMRSA 15                     | 6323/98              | 8                      |
| EMRSA 16                     | 00036/95             | 4                      |
| EMRSA 16                     | 00998/95             | 4                      |
| EMRSA 16                     | 03732/95             | 4                      |
| EMRSA 16                     | 07121/95             | 4                      |
| EMRSA 16                     | 07924/95             | 4                      |
| EMRSA 16                     | 18200/95             | 8                      |
| EMRSA 16                     | 18205/95             | 4                      |
| EMRSA 16                     | 21354/95             | 4                      |
| EMRSA 16                     | 23728/98             | 8                      |
| EMRSA 16                     | 23729/98             | 4                      |
| EMRSA 16                     | 32010/96             | 4                      |
| EMRSA 16                     | 34256/96             | 4                      |
| MRSA                         | NCTC 11939           | 4                      |
| <i>Staphylococcus aureus</i> | NCTC 6571            | 4                      |

## Mode of Action Studies

### Reporter strain panel

A *B. subtilis* reporter strain panel, *gyrA*, *ypuA*, *fabHA*,  $\phi 105$ , *helD* and *lial*,<sup>16-18</sup> was used to indicate likely modes of action of tatiomicin/tatiomicin\*. *B. subtilis* reporter strains were analysed in a Kirby Bauer disc diffusion assay using nutrient agar supplemented with X-Gal (100  $\mu\text{g}/\text{mL}$ ). LacZ activity is visualised by blue colouration due to hydrolysis of X-Gal. The plates were imaged on black background to observe the halo and on white background to observe the blue coloration.

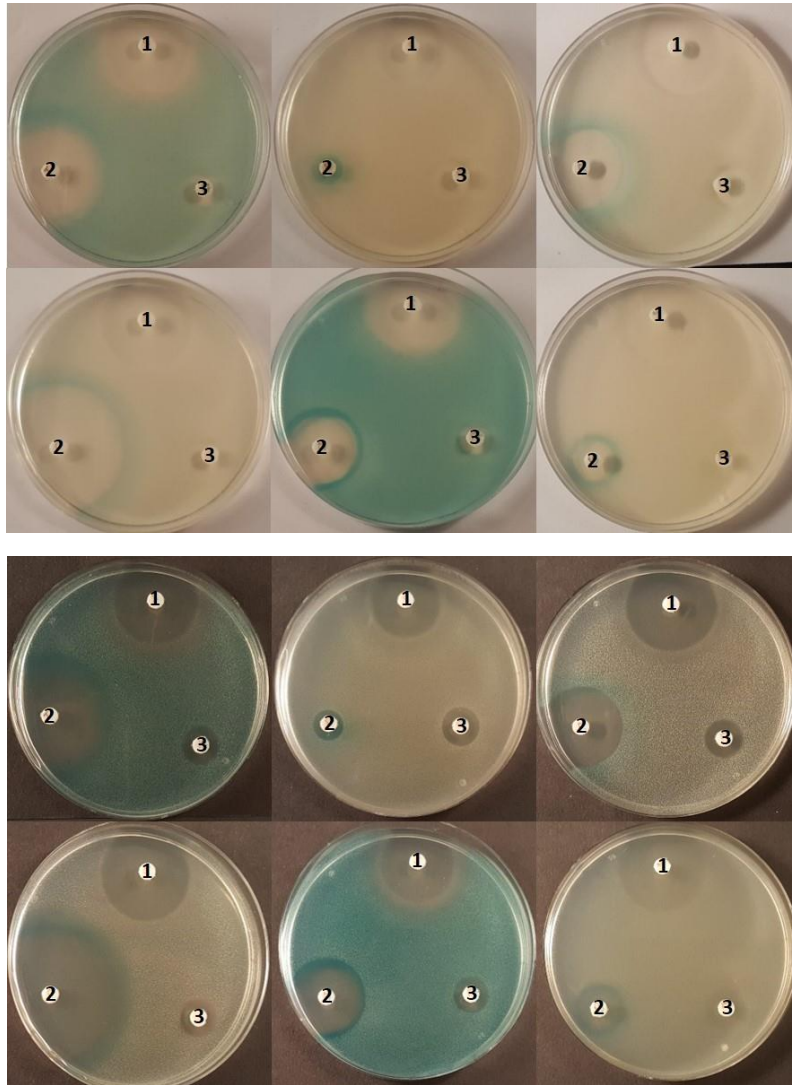

**Figure S36** Reporter panel analysis of tatiomicin/tatiomicin\*. Controls: **1**, (negative control) spectinomycin 1 mg; **2**, (positive controls) *fabHA* – Triclosan 250  $\mu\text{g}$ , *ypuA* – cefotaxime 10  $\mu\text{g}$ , *gyrA* – nalidixic acid 30  $\mu\text{g}$ ,  $\phi 105$  – doxorubicin 10  $\mu\text{g}$ , *helD* – rifampicin 10  $\mu\text{g}$ ; **3** tatiomicin 10  $\mu\text{g}$ . **Top, left to right:** fatty acid synthesis (*fabHA*), DNA damage ( $\phi 105$ ) RNA polymerase inhibition (*helD*). **Bottom, left to right:** cell wall damage (*ypuA*), gyrase inhibition (*gyrA*), cell envelope reporter (*lial*).

## Assessment of Michael acceptor ability of tatiomicin

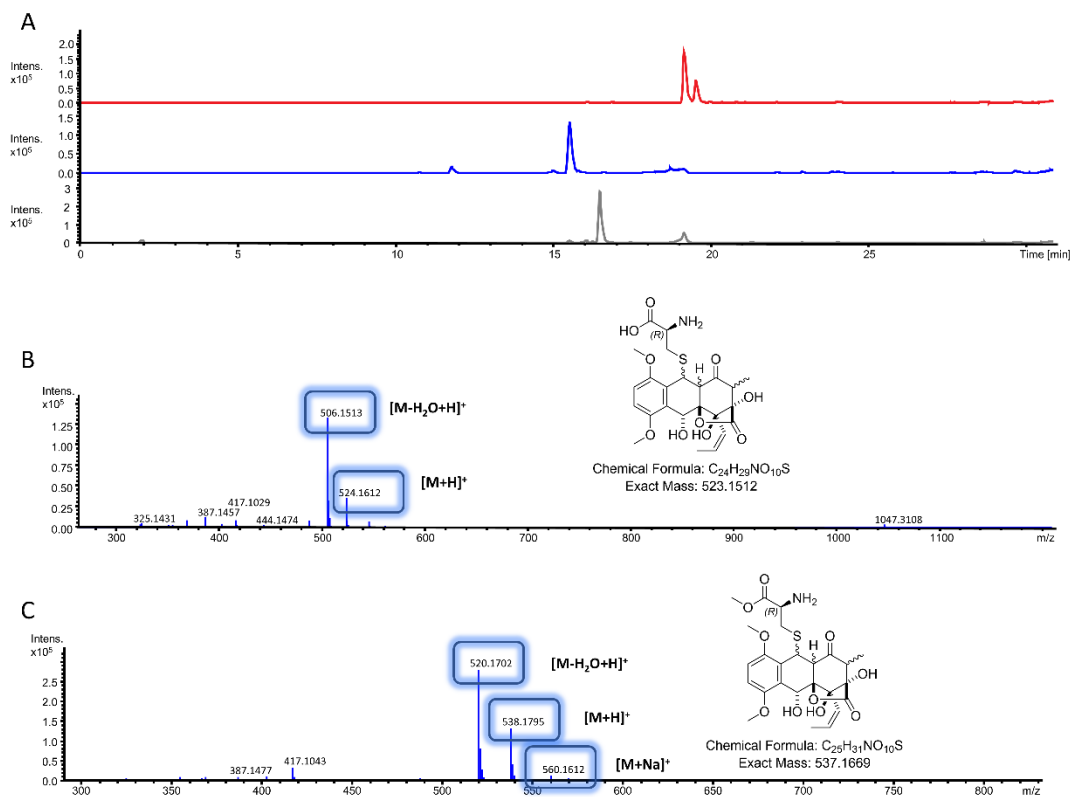

**Figure S37** Michael addition of tatiomicin with L-cystine and L-cystine methyl ester. LCMS base peak chromatograms of the resulting reactions are depicted (A). Red line tatiomicin control. Blue line tatiomicin with L-cystine. Grey line tatiomicin with L-cystine methyl ester. (B) MS spectrum of L-cystine with tatiomicin at 15.5min (theoretical product shown). (C) MS spectrum of L-cystine methyl ester with tatiomicin at 16.5min (theoretical product shown). The highest isotope peak is labelled.



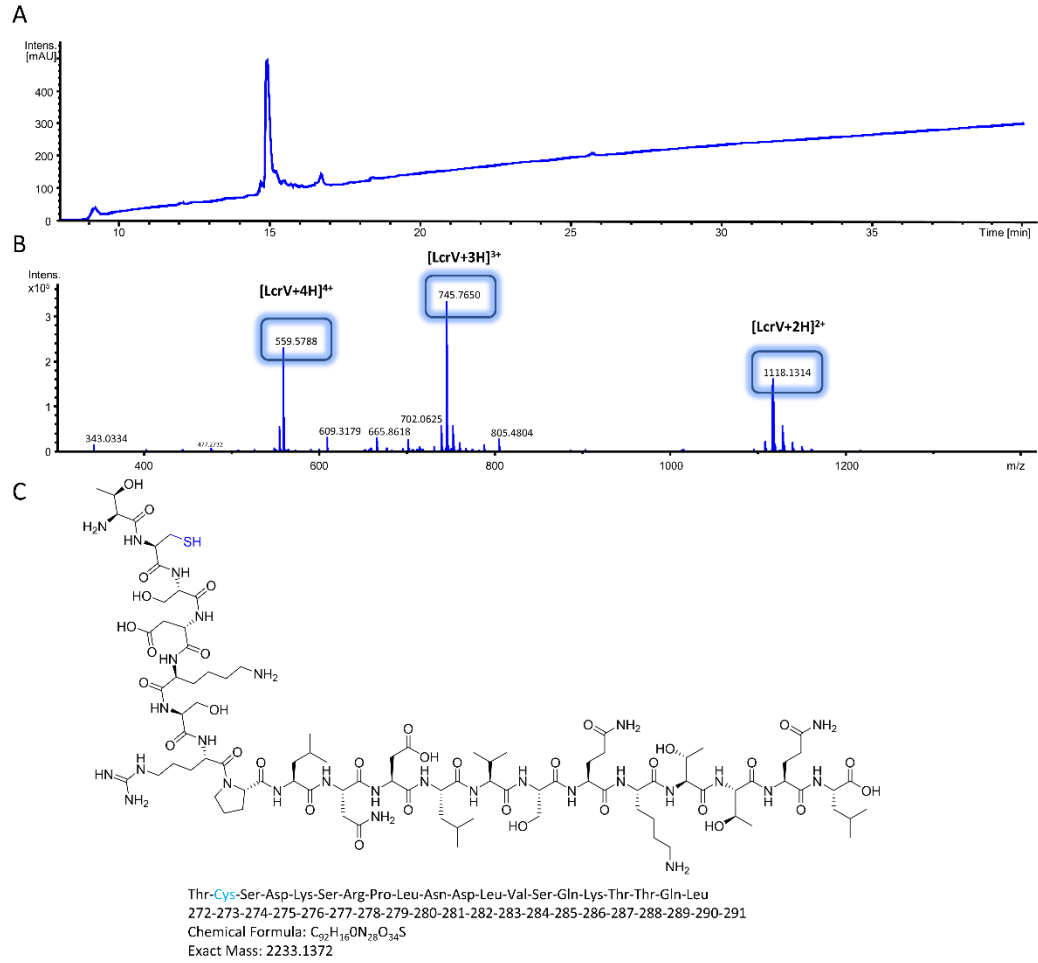

**Figure S38** LCMS base peak chromatograms of the peptide LcrV (272-291) (A). MS spectrum of LcrV (272-291) at 14.9 min. The highest isotope peak is labelled. (B). Structure of LcrV (272-291) with cysteine labelled in blue.

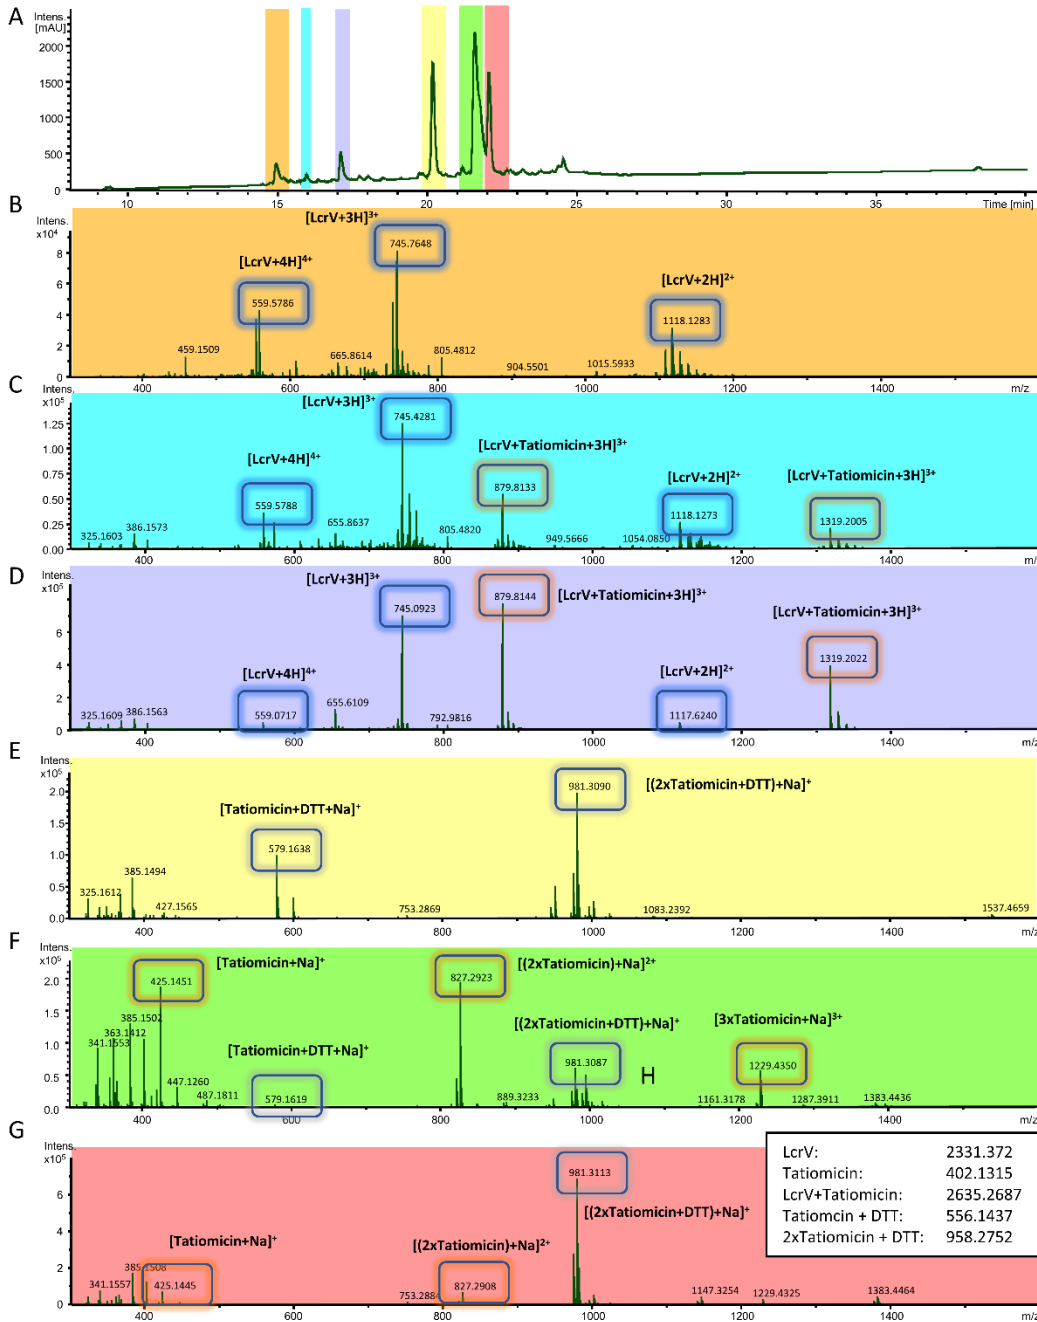

**Figure S39** Michael addition of tatiomicin with LcrV (271-291) in the presence of DTT. LCMS base peak chromatograms of the resulting reactions are depicted (A) the colour of each labelled peak corresponds to MS spectrum in the same colour below. (B – orange box) Mass spectrum at 15.0 min indicates unreacted LcrV (271-291). (C – turquoise box) Mass spectrum at 16.0 min. LcrV (271-291) reacted with tatiomicin. (D – purple box) Mass spectrum at 17.2 min indicates LcrV (271-291) reacted with tatiomicin. (E – yellow box) Mass spectrum at 20.2 min. Tatiomicin reacted with DTT. (F – green box) Mass spectrum at 21.6 Tatiomicin reacted with DTT. (G – turquoise red) Mass spectrum at 22.1 min. Tatiomicin reacted with DTT. The highest isotope peak in each MS chromatogram is labelled.

## Single cell microscopy

### Quantification

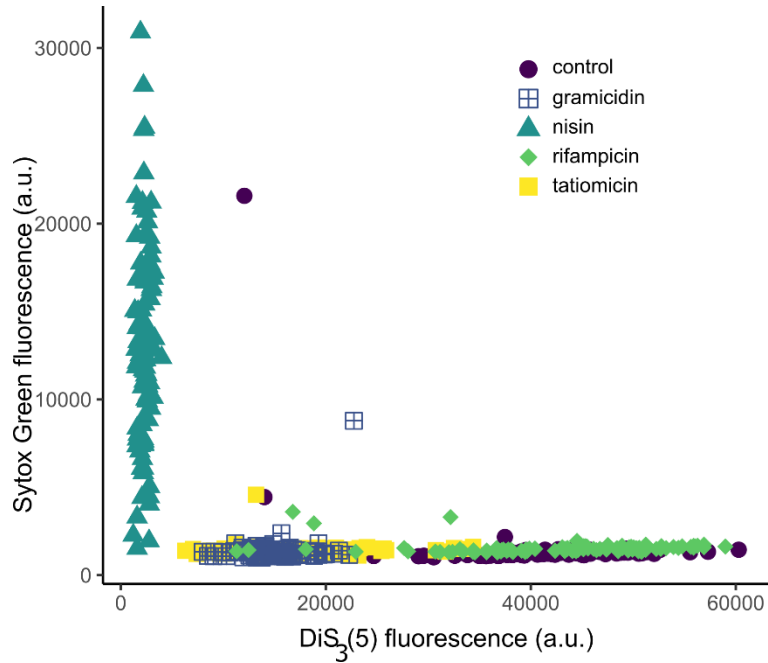

**Figure S40.** Cellular DiS<sub>3</sub>(5) and Sytox Green fluorescence values were quantified for cells treated with Gramicidin, nisin, rifampicin and tatiomicin. The scatter plot depicts the fluorescence intensity values of individual cells (n = 100 per compound) for both dyes.

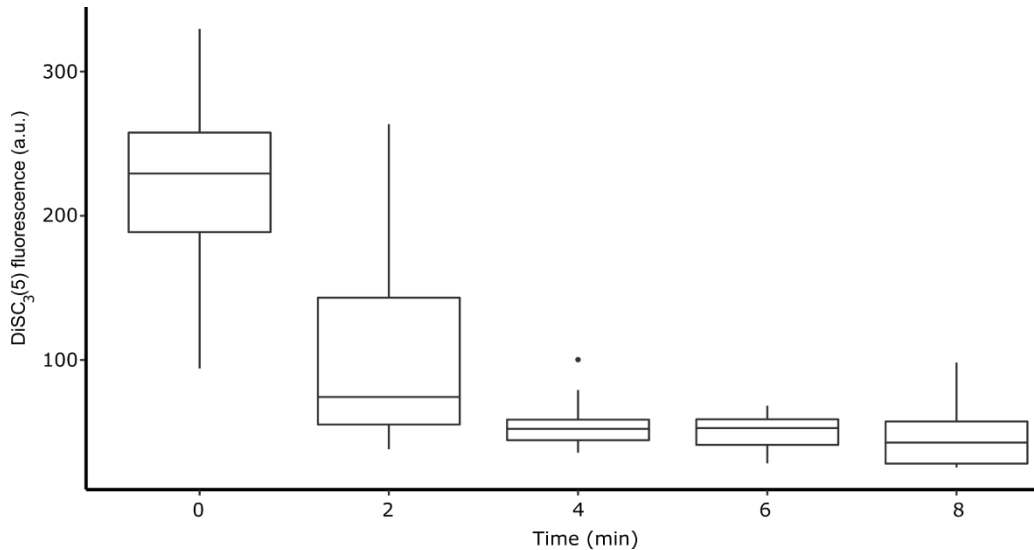

**Figure S41.** Cellular DiS<sub>3</sub>(5) fluorescence values for cells treated with tatiomicin. A fresh sample was analyzed every 2 min. The box plot depicts the fluorescence intensity values of individual cells (n = >30) over time.

### **Creation of tatiomicin/tatiomicin\* resistant mutants**

*B. subtilis* 168CA cells were grown to late exponential phase in LB broth ( $\sim 2 \times 10^8$  CFU/mL). We plated 100  $\mu$ L ( $2 \times 10^7$  CFU) on plates containing 4x MIC (64  $\mu$ g/mL) tatiomicin/tatiomicin\* in duplicates and incubated the plates at 37°C for 18h. We observed four colonies. However when these were re-streaked on plates containing 64  $\mu$ g/mL tatiomicin/tatiomicin\* no increase in resistance could be observed.

## Microorganisms used

**Table S15 Microorganisms used**

| Strain                                                                                                                                                                          | Reference   |
|---------------------------------------------------------------------------------------------------------------------------------------------------------------------------------|-------------|
| <i>Amycolatopsis</i> sp DEM30355                                                                                                                                                | 19-21       |
| <i>Bacillus subtilis</i> 168CA                                                                                                                                                  | 22          |
| <i>B. subtilis</i> PL39 <i>gyrA</i> ::pMUTIN4 <i>ermC gyrA'</i> - <i>lacZ</i> <i>P<sub>spac</sub>-gyrA</i> <sup>+</sup> . DNA Gyrase inhibition reporter                        | 19          |
| <i>B. subtilis</i> <i>ypuA</i> ::pMUTIN4 <i>ermC ypuA'</i> - <i>lacZ</i> . Cell wall damage reporter                                                                            | 17          |
| <i>B. subtilis</i> <i>fabHA</i> ::pMUTIN4 <i>ermC gyrA'</i> - <i>lacZ</i> <i>P<sub>spac</sub>-gyrA</i> <sup>+</sup> . Fatty acid synthesis inhibition reporter ( <i>fabHA</i> ) | 16          |
| <i>B. subtilis</i> DNA damage reporter ( <i>lacZ</i> fusion to a late promoter in a $\phi$ 105 prophage)                                                                        | 19          |
| <i>B. subtilis</i> <i>held</i> ::pMUTIN4 <i>held-lacZ ermC</i> . RNA polymerase inhibition reporter                                                                             | 17          |
| <i>B. subtilis</i> <i>lial</i> ::pMUTIN4 <i>lial-lacZ ermC</i> . Cell envelope stress reporter                                                                                  | 18          |
| <i>Streptomyces coelicolor</i> M1152                                                                                                                                            | 23          |
| <i>Escherichia coli</i> TOP10/pR9406                                                                                                                                            | 24          |
| <i>E. coli</i> ET12567                                                                                                                                                          | 25          |
| <i>B. subtilis</i> <i>trpC2 sacA</i> :: <i>hbs-mgfp</i> mut3 (cat)                                                                                                              | unpublished |
| CRW419 <i>B. subtilis</i> <i>trpC2 amyE</i> ::(spc Pxyl(M9R)-WALP23- <i>mcherry</i> (B))<br><i>sacA</i> :: <i>hbs-mgfp</i> mut3 (cat)                                           | unpublished |

## References

1. Z. Pragai, C. Eschevins, S. Bron and C. R. Harwood, *J Bacteriol*, 2001, **183**, 2505-2515.
2. H. Nowell, S. A. Barnett, K. E. Christensen, S. J. Teat and D. R. Allan, *J Synchrotron Radiat*, 2012, **19**, 435-441.
3. G. M. Sheldrick, *Acta Crystallogr A Found Adv*, 2015, **71**, 3-8.
4. G. M. Sheldrick, *Acta Crystallogr A*, 2008, **64**, 112-122.
5. D. R. Allan, H. Nowell, S. A. Barnett, M. R. Warren, A. Wilcox, J. Christensen, L. K. Saunders, A. Peach, M. T. Hooper, L. Zaja, S. Patel, L. Cahill, R. Marshall, S. Trimnell, A. J. Foster, T. Bates, S. Lay, M. A. Williams, P. V. Hathaway, G. Winter, M. Gerstel and R. W. Wooley, *Crystals*, 2017, **7**, 336.
6. H. D. Flack, *Acta Crystallographica Section A*, 1983, **39**, 876-881.
7. H. D. Flack and G. Bernardinelli, *Acta Crystallographica Section A*, 1999, **55**, 908-915.
8. H. D. Flack and G. Bernardinelli, *Journal of Applied Crystallography*, 2000, **33**, 1143-1148.
9. *Journal*.
10. R. K. Aziz, D. Bartels, A. A. Best, M. DeJongh, T. Disz, R. A. Edwards, K. Formsma, S. Gerdes, E. M. Glass, M. Kubal, F. Meyer, G. J. Olsen, R. Olson, A. L. Osterman, R. A. Overbeek, L. K. McNeil, D. Paarmann, T. Paczian, B. Parrello, G. D. Pusch, C. Reich, R. Stevens, O. Vassieva, V. Vonstein, A. Wilke and O. Zagnitko, *BMC Genomics*, 2008, **9**, 75.
11. K. Blin, S. Shaw, A. M. Kloosterman, Z. Charlop-Powers, G. P. van Wezel, Marnix H. Medema and T. Weber, *Nucleic Acids Research*, 2021, **49**, W29-W35.
12. X. Yan, K. Probst, A. Linnenbrink, M. Arnold, T. Paululat, A. Zeeck and A. Bechthold, *Chembiochem*, 2012, **13**, 224-230.
13. P. Schwarzer, O. Tsyplik, C. Zuo, A. Alali, J. Wunsch-Palasis, T. Heitzler, J. Derochefort, M. Bernhardt, X. Yan, T. Paululat and A. Bechthold, *Molecules*, 2020, **25**, 1955.
14. A. Alali, L. Zhang, J. Li, C. Zuo, D. Wassouf, X. Yan, P. Schwarzer, S. Günther, O. Einsle and A. Bechthold, *Molecular Biotechnology*, 2021, **63**, 502-514.
15. O. Tsyplik, R. Makitrynsky, B. Frensch, D. L. Zechel, T. Paululat, R. Teufel and A. Bechthold, *J Am Chem Soc*, 2020, **142**, 5913-5917.
16. H. P. Fischer, N. A. Brunner, B. Wieland, J. Paquette, L. Macko, K. Ziegelbauer and C. Freiberg, *Genome Res*, 2004, **14**, 90-98.
17. A. Urban, S. Eckermann, B. Fast, S. Metzger, M. Gehling, K. Ziegelbauer, H. Rubsamen-Waigmann and C. Freiberg, *Appl Environ Microbiol*, 2007, **73**, 6436-6443.
18. T. Mascher, S. L. Zimmer, T. A. Smith and J. D. Helmann, *Antimicrob Agents Chemother*, 2004, **48**, 2888-2896.
19. B. Kepplinger, S. Morton-Laing, K. H. Seistrup, E. C. L. Marrs, A. P. Hopkins, J. D. Perry, H. Strahl, M. J. Hall, J. Errington and N. E. E. Allenby, *ACS Chem Biol*, 2018, **13**, 207-214.
20. H. Mosaei, V. Molodtsov, B. Kepplinger, J. Harbottle, C. W. Moon, R. E. Jeeves, L. Ceccaroni, Y. Shin, S. Morton-Laing, E. C. L. Marrs, C. Wills, W. Clegg, Y. Yuzenkova, J. D. Perry, J. Bacon, J. Errington, N. E. E. Allenby, M. J. Hall, K. S. Murakami and N. Zenkin, *Mol Cell*, 2018, **72**, 263-274 e265.
21. C. K. Okoro, R. Brown, A. L. Jones, B. A. Andrews, J. A. Asenjo, M. Goodfellow and A. T. Bull, *Antonie Van Leeuwenhoek*, 2009, **95**, 121-133.
22. F. Kunst, N. Ogasawara, I. Moszer, A. M. Albertini, G. Alloni, V. Azevedo, M. G. Bertero, P. Bessières, A. Bolotin, S. Borchert, R. Borriss, L. Boursier, A. Brans, M. Braun, S. C. Brignell, S. Bron, S. Brouillet, C. V. Bruschi, B. Caldwell, V. Capuano, N. M. Carter, S. K. Choi, J. J. Cordani, I. F. Connerton, N. J. Cummings, R. A. Daniel, F. Denziot, K. M. Devine, A. Düsterhöft, S. D. Ehrlich, P. T. Emmerson, K. D. Entian, J. Errington, C. Fabret, E. Ferrari, D. Foulger, C. Fritz, M. Fujita, Y.

- Fujita, S. Fuma, A. Galizzi, N. Galleron, S. Y. Ghim, P. Glaser, A. Goffeau, E. J. Golightly, G. Grandi, G. Guiseppi, B. J. Guy, K. Haga, J. Haiech, C. R. Harwood, A. Hènaut, H. Hilbert, S. Holsappel, S. Hosono, M. F. Hullo, M. Itaya, L. Jones, B. Joris, D. Karamata, Y. Kasahara, M. Klaerr-Blanchard, C. Klein, Y. Kobayashi, P. Koetter, G. Koningstein, S. Krogh, M. Kumano, K. Kurita, A. Lapidus, S. Lardinois, J. Lauber, V. Lazarevic, S. M. Lee, A. Levine, H. Liu, S. Masuda, C. Mauël, C. Médigue, N. Medina, R. P. Mellado, M. Mizuno, D. Moestl, S. Nakai, M. Noback, D. Noone, M. O'Reilly, K. Ogawa, A. Ogiwara, B. Oudega, S. H. Park, V. Parro, T. M. Pohl, D. Portelle, S. Porwollik, A. M. Prescott, E. Presecan, P. Pujic, B. Purnelle, G. Rapoport, M. Rey, S. Reynolds, M. Rieger, C. Rivolta, E. Rocha, B. Roche, M. Rose, Y. Sadaie, T. Sato, E. Scanlan, S. Schleich, R. Schroeter, F. Scoffone, J. Sekiguchi, A. Sekowska, S. J. Seror, P. Serror, B. S. Shin, B. Soldo, A. Sorokin, E. Tacconi, T. Takagi, H. Takahashi, K. Takemaru, M. Takeuchi, A. Tamakoshi, T. Tanaka, P. Terpstra, A. Togoni, V. Tosato, S. Uchiyama, M. Vandebol, F. Vannier, A. Vassarotti, A. Viari, R. Wambutt, H. Wedler, T. Weitzenegger, P. Winters, A. Wipat, H. Yamamoto, K. Yamane, K. Yasumoto, K. Yata, K. Yoshida, H. F. Yoshikawa, E. Zumstein, H. Yoshikawa and A. Danchin, *Nature*, 1997, **390**, 249-256.
23. A. Thanapipatsiri, J. Claesen, J. P. Gomez-Escribano, M. Bibb and A. Thamchaipenet, *Microb Cell Fact*, 2015, **14**, 145.
24. A. C. Jones, B. Gust, A. Kulik, L. Heide, M. J. Buttner and M. J. Bibb, *PLoS One*, 2013, **8**, e69319.
25. D. J. MacNeil, K. M. Gewain, C. L. Ruby, G. Dezeny, P. H. Gibbons and T. MacNeil, *Gene*, 1992, **111**, 61-68.
